# Supplementary material for: A new frog of the Leptodactylus fuscus species group (Anura: Leptodactylidae), endemic from the South American Gran Chaco
Source: PeerJ. 2019 Oct 11;7:e7869. doi: 10.7717/peerj.7869 (PMC6791353; doi:10.7717/peerj.7869)
Supplement: Supplemental Information 10 [file peerj-07-7869-s010.xlsx]

## Sheet: Hoja1
Species	Sound File	Locality	Call Duration (s)	Dominant frequency (Hz)	Intercall interval (s)	Call rate (calls/s)
Leptodactylus apepyta sp. nov.	LGE-B 001	El Cadillal, Tucumán, Argentina.	0.033	2263	0.162	5.12821
Leptodactylus apepyta sp. nov.	LGE-B 001	El Cadillal, Tucumán, Argentina.	0.034	2285	0.127	6.21118
Leptodactylus apepyta sp. nov.	LGE-B 001	El Cadillal, Tucumán, Argentina.	0.034	2242	0.156	5.26316
Leptodactylus apepyta sp. nov.	LGE-B 001	El Cadillal, Tucumán, Argentina.	0.035	2263	0.156	5.2356
Leptodactylus apepyta sp. nov.	LGE-B 001	El Cadillal, Tucumán, Argentina.	0.034	2263	0.156	5.26316
Leptodactylus apepyta sp. nov.	LGE-B 001	El Cadillal, Tucumán, Argentina.	0.033	2263	0.156	5.29101
Leptodactylus apepyta sp. nov.	LGE-B 001	El Cadillal, Tucumán, Argentina.	0.035	2242	0.156	5.2356
Leptodactylus apepyta sp. nov.	LGE-B 001	El Cadillal, Tucumán, Argentina.	0.034	2242	0.156	5.26316
Leptodactylus apepyta sp. nov.	LGE-B 001	El Cadillal, Tucumán, Argentina.	0.035	2285	0.156	5.2356
Leptodactylus apepyta sp. nov.	LGE-B 001	El Cadillal, Tucumán, Argentina.	0.037	2263	0.156	5.18135
Leptodactylus apepyta sp. nov.	LGE-B 001	El Cadillal, Tucumán, Argentina.	0.034	2263	0.156	5.26316
Leptodactylus apepyta sp. nov.	LGE-B 001	El Cadillal, Tucumán, Argentina.	0.038	2263	0.156	5.15464
Leptodactylus apepyta sp. nov.	LGE-B 001	El Cadillal, Tucumán, Argentina.	0.033	2306	0.156	5.29101
Leptodactylus apepyta sp. nov.	LGE-B 001	El Cadillal, Tucumán, Argentina.	0.033	2263	0.156	5.29101
Leptodactylus apepyta sp. nov.	LGE-B 001	El Cadillal, Tucumán, Argentina.	0.035	2285	0.156	5.2356
Leptodactylus apepyta sp. nov.	LGE-B 001	El Cadillal, Tucumán, Argentina.	0.034	2328	0.156	5.26316
Leptodactylus apepyta sp. nov.	LGE-B 001	El Cadillal, Tucumán, Argentina.	0.034	2285	0.115	6.71141
Leptodactylus apepyta sp. nov.	LGE-B 001	El Cadillal, Tucumán, Argentina.	0.033	2263	0.115	6.75676
Leptodactylus apepyta sp. nov.	LGE-B 001	El Cadillal, Tucumán, Argentina.	0.033	2263	0.115	6.75676
Leptodactylus apepyta sp. nov.	LGE-B 001	El Cadillal, Tucumán, Argentina.	0.033	2285	0.112	6.89655
Leptodactylus apepyta sp. nov.	LGE-B 001	El Cadillal, Tucumán, Argentina.	0.033	2242	0.112	6.89655
Leptodactylus apepyta sp. nov.	LGE-B 001	El Cadillal, Tucumán, Argentina.	0.033	2263	0.112	6.89655
Leptodactylus apepyta sp. nov.	LGE-B 001	El Cadillal, Tucumán, Argentina.	0.034	2263	0.112	6.84932
Leptodactylus apepyta sp. nov.	LGE-B 001	El Cadillal, Tucumán, Argentina.	0.033	2263	0.112	6.89655
Leptodactylus apepyta sp. nov.	LGE-B 001	El Cadillal, Tucumán, Argentina.	0.032	2263	0.112	6.94444
Leptodactylus apepyta sp. nov.	LGE-B 001	El Cadillal, Tucumán, Argentina.	0.033	2242	0.116	6.71141
Leptodactylus apepyta sp. nov.	LGE-B 001	El Cadillal, Tucumán, Argentina.	0.032	2263	0.116	6.75676
Leptodactylus apepyta sp. nov.	LGE-B 001	El Cadillal, Tucumán, Argentina.	0.033	2263	0.116	6.71141
Leptodactylus apepyta sp. nov.	LGE-B 001	El Cadillal, Tucumán, Argentina.	0.033	2263	0.116	6.71141
Leptodactylus apepyta sp. nov.	LGE-B 001	El Cadillal, Tucumán, Argentina.	0.035	2242	0.116	6.62252
Leptodactylus apepyta sp. nov.	LGE-B 001	El Cadillal, Tucumán, Argentina.	0.035	2263	0.116	6.62252
Leptodactylus apepyta sp. nov.	LGE-B 001	El Cadillal, Tucumán, Argentina.	0.034	2242	0.116	6.66667
Leptodactylus apepyta sp. nov.	LGE-B 001	El Cadillal, Tucumán, Argentina.	0.033	2285	0.116	6.71141
Leptodactylus apepyta sp. nov.	LGE-B 001	El Cadillal, Tucumán, Argentina.	0.034	2242	0.118	6.57895
Leptodactylus apepyta sp. nov.	LGE-B 001	El Cadillal, Tucumán, Argentina.	0.035	2285	0.118	6.53595
Leptodactylus apepyta sp. nov.	LGE-B 001	El Cadillal, Tucumán, Argentina.	0.034	2242	0.118	6.57895
Leptodactylus apepyta sp. nov.	LGE-B 001	El Cadillal, Tucumán, Argentina.	0.032	2263	0.118	6.66667
Leptodactylus apepyta sp. nov.	LGE-B 001	El Cadillal, Tucumán, Argentina.	0.035	2263	0.118	6.53595
Leptodactylus apepyta sp. nov.	LGE-B 001	El Cadillal, Tucumán, Argentina.	0.033	2242	0.118	6.62252
Leptodactylus apepyta sp. nov.	LGE-B 001	El Cadillal, Tucumán, Argentina.	0.031	2263	0.118	6.71141
Leptodactylus apepyta sp. nov.	LGE-B 001	El Cadillal, Tucumán, Argentina.	0.033	2263	0.118	6.62252
Leptodactylus apepyta sp. nov.	LGE-B 002	El Ceibal, San Pablo, Tucumán, Argentina.	0.035	2242	0.099	7.46269
Leptodactylus apepyta sp. nov.	LGE-B 002	El Ceibal, San Pablo, Tucumán, Argentina.	0.034	2242	0.099	7.5188
Leptodactylus apepyta sp. nov.	LGE-B 002	El Ceibal, San Pablo, Tucumán, Argentina.	0.033	2242	0.104	7.29927
Leptodactylus apepyta sp. nov.	LGE-B 002	El Ceibal, San Pablo, Tucumán, Argentina.	0.034	2242	0.098	7.57576
Leptodactylus apepyta sp. nov.	LGE-B 002	El Ceibal, San Pablo, Tucumán, Argentina.	0.037	2242	0.097	7.46269
Leptodactylus apepyta sp. nov.	LGE-B 002	El Ceibal, San Pablo, Tucumán, Argentina.	0.036	2220	0.1	7.35294
Leptodactylus apepyta sp. nov.	LGE-B 002	El Ceibal, San Pablo, Tucumán, Argentina.	0.033	2220	0.1	7.5188
Leptodactylus apepyta sp. nov.	LGE-B 002	El Ceibal, San Pablo, Tucumán, Argentina.	0.035	2220	0.1	7.40741
Leptodactylus apepyta sp. nov.	LGE-B 002	El Ceibal, San Pablo, Tucumán, Argentina.	0.035	2242	0.1	7.40741
Leptodactylus apepyta sp. nov.	LGE-B 002	El Ceibal, San Pablo, Tucumán, Argentina.	0.033	2242	0.099	7.57576
Leptodactylus apepyta sp. nov.	LGE-B 002	El Ceibal, San Pablo, Tucumán, Argentina.	0.034	2220	0.099	7.5188
Leptodactylus apepyta sp. nov.	LGE-B 002	El Ceibal, San Pablo, Tucumán, Argentina.	0.033	2242	0.099	7.57576
Leptodactylus apepyta sp. nov.	LGE-B 002	El Ceibal, San Pablo, Tucumán, Argentina.	0.034	2242	0.1	7.46269
Leptodactylus apepyta sp. nov.	LGE-B 002	El Ceibal, San Pablo, Tucumán, Argentina.	0.033	2242	0.097	7.69231
Leptodactylus apepyta sp. nov.	LGE-B 002	El Ceibal, San Pablo, Tucumán, Argentina.	0.035	2242	0.097	7.57576
Leptodactylus apepyta sp. nov.	LGE-B 002	El Ceibal, San Pablo, Tucumán, Argentina.	0.034	2242	0.097	7.63359
Leptodactylus apepyta sp. nov.	LGE-B 002	El Ceibal, San Pablo, Tucumán, Argentina.	0.034	2242	0.102	7.35294
Leptodactylus apepyta sp. nov.	LGE-B 002	El Ceibal, San Pablo, Tucumán, Argentina.	0.034	2242	0.101	7.40741
Leptodactylus apepyta sp. nov.	LGE-B 002	El Ceibal, San Pablo, Tucumán, Argentina.	0.033	2220	0.108	7.0922
Leptodactylus apepyta sp. nov.	LGE-B 002	El Ceibal, San Pablo, Tucumán, Argentina.	0.032	2242	0.108	7.14286
Leptodactylus apepyta sp. nov.	LGE-B 002	El Ceibal, San Pablo, Tucumán, Argentina.	0.032	2242	0.108	7.14286
Leptodactylus apepyta sp. nov.	LGE-B 002	El Ceibal, San Pablo, Tucumán, Argentina.	0.031	2263	0.108	7.19424
Leptodactylus apepyta sp. nov.	LGE-B 002	El Ceibal, San Pablo, Tucumán, Argentina.	0.03	2263	0.108	7.24638
Leptodactylus apepyta sp. nov.	LGE-B 002	El Ceibal, San Pablo, Tucumán, Argentina.	0.041	2242	0.108	6.71141
Leptodactylus apepyta sp. nov.	LGE-B 002	El Ceibal, San Pablo, Tucumán, Argentina.	0.04	2242	0.108	6.75676
Leptodactylus apepyta sp. nov.	LGE-B 002	El Ceibal, San Pablo, Tucumán, Argentina.	0.043	2242	0.108	6.62252
Leptodactylus apepyta sp. nov.	LGE-B 002	El Ceibal, San Pablo, Tucumán, Argentina.	0.04	2263	0.108	6.75676
Leptodactylus apepyta sp. nov.	LGE-B 002	El Ceibal, San Pablo, Tucumán, Argentina.	0.04	2263	0.096	7.35294
Leptodactylus apepyta sp. nov.	LGE-B 002	El Ceibal, San Pablo, Tucumán, Argentina.	0.04	2263	0.094	7.46269
Leptodactylus apepyta sp. nov.	LGE-B 002	El Ceibal, San Pablo, Tucumán, Argentina.	0.039	2263	0.094	7.5188
Leptodactylus apepyta sp. nov.	LGE-B 002	El Ceibal, San Pablo, Tucumán, Argentina.	0.042	2263	0.094	7.35294
Leptodactylus apepyta sp. nov.	LGE-B 002	El Ceibal, San Pablo, Tucumán, Argentina.	0.045	2242	0.094	7.19424
Leptodactylus apepyta sp. nov.	LGE-B 002	El Ceibal, San Pablo, Tucumán, Argentina.	0.042	2242	0.097	7.19424
Leptodactylus apepyta sp. nov.	LGE-B 002	El Ceibal, San Pablo, Tucumán, Argentina.	0.042	2242	0.089	7.63359
Leptodactylus apepyta sp. nov.	LGE-B 002	El Ceibal, San Pablo, Tucumán, Argentina.	0.043	2242	0.089	7.57576
Leptodactylus apepyta sp. nov.	LGE-B 002	El Ceibal, San Pablo, Tucumán, Argentina.	0.046	2242	0.09	7.35294
Leptodactylus apepyta sp. nov.	LGE-B 002	El Ceibal, San Pablo, Tucumán, Argentina.	0.047	2242	0.09	7.29927
Leptodactylus apepyta sp. nov.	LGE-B 002	El Ceibal, San Pablo, Tucumán, Argentina.	0.046	2242	0.09	7.35294
Leptodactylus apepyta sp. nov.	LGE-B 002	El Ceibal, San Pablo, Tucumán, Argentina.	0.041	2242	0.09	7.63359
Leptodactylus apepyta sp. nov.	LGE-B 002	El Ceibal, San Pablo, Tucumán, Argentina.	0.044	2242	0.09	7.46269
Leptodactylus apepyta sp. nov.	LGE-B 002	El Ceibal, San Pablo, Tucumán, Argentina.	0.032	2242	0.105	7.29927
Leptodactylus apepyta sp. nov.	LGE-B 002	El Ceibal, San Pablo, Tucumán, Argentina.	0.033	2242	0.109	7.04225
Leptodactylus apepyta sp. nov.	LGE-B 002	El Ceibal, San Pablo, Tucumán, Argentina.	0.042	2242	0.109	6.62252
Leptodactylus apepyta sp. nov.	LGE-B 002	El Ceibal, San Pablo, Tucumán, Argentina.	0.031	2242	0.109	7.14286
Leptodactylus apepyta sp. nov.	LGE-B 002	El Ceibal, San Pablo, Tucumán, Argentina.	0.041	2242	0.101	7.04225
Leptodactylus apepyta sp. nov.	LGE-B 002	El Ceibal, San Pablo, Tucumán, Argentina.	0.038	2242	0.103	7.0922
Leptodactylus apepyta sp. nov.	LGE-B 002	El Ceibal, San Pablo, Tucumán, Argentina.	0.04	2242	0.103	6.99301
Leptodactylus apepyta sp. nov.	LGE-B 002	El Ceibal, San Pablo, Tucumán, Argentina.	0.041	2242	0.103	6.94444
Leptodactylus apepyta sp. nov.	LGE-B 002	El Ceibal, San Pablo, Tucumán, Argentina.	0.038	2242	0.1	7.24638
Leptodactylus apepyta sp. nov.	LGE-B 002	El Ceibal, San Pablo, Tucumán, Argentina.	0.041	2242	0.1	7.0922
Leptodactylus apepyta sp. nov.	LGE-B 003	El Ceibal, San Pablo, Tucumán, Argentina	0.05	2242	0.176	4.42478
Leptodactylus apepyta sp. nov.	LGE-B 003	El Ceibal, San Pablo, Tucumán, Argentina	0.052	2242	0.18	4.31034
Leptodactylus apepyta sp. nov.	LGE-B 003	El Ceibal, San Pablo, Tucumán, Argentina	0.049	2242	0.175	4.46429
Leptodactylus apepyta sp. nov.	LGE-B 003	El Ceibal, San Pablo, Tucumán, Argentina	0.053	2242	0.167	4.54545
Leptodactylus apepyta sp. nov.	LGE-B 003	El Ceibal, San Pablo, Tucumán, Argentina	0.051	2242	0.173	4.46429
Leptodactylus apepyta sp. nov.	LGE-B 003	El Ceibal, San Pablo, Tucumán, Argentina	0.052	2242	0.17	4.5045
Leptodactylus apepyta sp. nov.	LGE-B 003	El Ceibal, San Pablo, Tucumán, Argentina	0.049	2242	0.179	4.38596
Leptodactylus apepyta sp. nov.	LGE-B 003	El Ceibal, San Pablo, Tucumán, Argentina	0.057	2242	0.161	4.58716
Leptodactylus apepyta sp. nov.	LGE-B 003	El Ceibal, San Pablo, Tucumán, Argentina	0.053	2242	0.161	4.6729
Leptodactylus apepyta sp. nov.	LGE-B 003	El Ceibal, San Pablo, Tucumán, Argentina	0.051	2242	0.17	4.52489
Leptodactylus apepyta sp. nov.	LGE-B 003	El Ceibal, San Pablo, Tucumán, Argentina	0.05	2242	0.174	4.46429
Leptodactylus apepyta sp. nov.	LGE-B 003	El Ceibal, San Pablo, Tucumán, Argentina	0.051	2220	0.171	4.5045
Leptodactylus apepyta sp. nov.	LGE-B 003	El Ceibal, San Pablo, Tucumán, Argentina	0.052	2242	0.171	4.4843
Leptodactylus apepyta sp. nov.	LGE-B 003	El Ceibal, San Pablo, Tucumán, Argentina	0.052	2220	0.171	4.4843
Leptodactylus apepyta sp. nov.	LGE-B 003	El Ceibal, San Pablo, Tucumán, Argentina	0.05	2242	0.172	4.5045
Leptodactylus apepyta sp. nov.	LGE-B 003	El Ceibal, San Pablo, Tucumán, Argentina	0.049	2242	0.179	4.38596
Leptodactylus apepyta sp. nov.	LGE-B 003	El Ceibal, San Pablo, Tucumán, Argentina	0.05	2242	0.169	4.56621
Leptodactylus apepyta sp. nov.	LGE-B 003	El Ceibal, San Pablo, Tucumán, Argentina	0.055	2242	0.178	4.29185
Leptodactylus apepyta sp. nov.	LGE-B 003	El Ceibal, San Pablo, Tucumán, Argentina	0.05	2242	0.172	4.5045
Leptodactylus apepyta sp. nov.	LGE-B 003	El Ceibal, San Pablo, Tucumán, Argentina	0.053	2242	0.17	4.4843
Leptodactylus apepyta sp. nov.	LGE-B 003	El Ceibal, San Pablo, Tucumán, Argentina	0.051	2242	0.174	4.44444
Leptodactylus apepyta sp. nov.	LGE-B 003	El Ceibal, San Pablo, Tucumán, Argentina	0.05	2242	0.174	4.46429
Leptodactylus apepyta sp. nov.	LGE-B 003	El Ceibal, San Pablo, Tucumán, Argentina	0.054	2242	0.169	4.4843
Leptodactylus apepyta sp. nov.	LGE-B 003	El Ceibal, San Pablo, Tucumán, Argentina	0.05	2220	0.163	4.69484
Leptodactylus apepyta sp. nov.	LGE-B 003	El Ceibal, San Pablo, Tucumán, Argentina	0.049	2242	0.165	4.6729
Leptodactylus apepyta sp. nov.	LGE-B 003	El Ceibal, San Pablo, Tucumán, Argentina	0.053	2242	0.165	4.58716
Leptodactylus apepyta sp. nov.	LGE-B 003	El Ceibal, San Pablo, Tucumán, Argentina	0.052	2220	0.165	4.60829
Leptodactylus apepyta sp. nov.	LGE-B 003	El Ceibal, San Pablo, Tucumán, Argentina	0.052	2242	0.165	4.60829
Leptodactylus apepyta sp. nov.	LGE-B 003	El Ceibal, San Pablo, Tucumán, Argentina	0.055	2220	0.165	4.54545
Leptodactylus apepyta sp. nov.	LGE-B 003	El Ceibal, San Pablo, Tucumán, Argentina	0.055	2242	0.165	4.54545
Leptodactylus apepyta sp. nov.	LGE-B 003	El Ceibal, San Pablo, Tucumán, Argentina	0.051	2242	0.165	4.62963
Leptodactylus apepyta sp. nov.	LGE-B 003	El Ceibal, San Pablo, Tucumán, Argentina	0.051	2242	0.183	4.2735
Leptodactylus apepyta sp. nov.	LGE-B 003	El Ceibal, San Pablo, Tucumán, Argentina	0.053	2242	0.183	4.23729
Leptodactylus apepyta sp. nov.	LGE-B 003	El Ceibal, San Pablo, Tucumán, Argentina	0.052	2242	0.183	4.25532
Leptodactylus apepyta sp. nov.	LGE-B 003	El Ceibal, San Pablo, Tucumán, Argentina	0.048	2242	0.183	4.329
Leptodactylus apepyta sp. nov.	LGE-B 003	El Ceibal, San Pablo, Tucumán, Argentina	0.055	2242	0.165	4.54545
Leptodactylus apepyta sp. nov.	LGE-B 003	El Ceibal, San Pablo, Tucumán, Argentina	0.053	2242	0.165	4.58716
Leptodactylus apepyta sp. nov.	LGE-B 003	El Ceibal, San Pablo, Tucumán, Argentina	0.053	2242	0.165	4.58716
Leptodactylus apepyta sp. nov.	LGE-B 003	El Ceibal, San Pablo, Tucumán, Argentina	0.055	2242	0.165	4.54545
Leptodactylus apepyta sp. nov.	LGE-B 003	El Ceibal, San Pablo, Tucumán, Argentina	0.054	2242	0.165	4.56621
Leptodactylus apepyta sp. nov.	LGE-B 003	El Ceibal, San Pablo, Tucumán, Argentina	0.047	2242	0.165	4.71698
Leptodactylus apepyta sp. nov.	LGE-B 003	El Ceibal, San Pablo, Tucumán, Argentina	0.049	2242	0.165	4.6729
Leptodactylus apepyta sp. nov.	LGE-B 003	El Ceibal, San Pablo, Tucumán, Argentina	0.052	2242	0.165	4.60829
Leptodactylus apepyta sp. nov.	LGE-B 003	El Ceibal, San Pablo, Tucumán, Argentina	0.055	2242	0.204	3.861
Leptodactylus apepyta sp. nov.	LGE-B 003	El Ceibal, San Pablo, Tucumán, Argentina	0.054	2242	0.204	3.87597
Leptodactylus apepyta sp. nov.	LGE-B 003	El Ceibal, San Pablo, Tucumán, Argentina	0.052	2242	0.204	3.90625
Leptodactylus apepyta sp. nov.	LGE-B 003	El Ceibal, San Pablo, Tucumán, Argentina	0.051	2242	0.204	3.92157
Leptodactylus apepyta sp. nov.	LGE-B 003	El Ceibal, San Pablo, Tucumán, Argentina	0.052	2242	0.204	3.90625
Leptodactylus apepyta sp. nov.	LGE-B 003	El Ceibal, San Pablo, Tucumán, Argentina	0.054	2242	0.204	3.87597
Leptodactylus apepyta sp. nov.	LGE-B 003	El Ceibal, San Pablo, Tucumán, Argentina	0.055	2242	0.204	3.861
Leptodactylus apepyta sp. nov.	LGE-B 004	Las Lomitas, Formosa, Argentina.	0.042	2414	0.122	6.09756
Leptodactylus apepyta sp. nov.	LGE-B 004	Las Lomitas, Formosa, Argentina.	0.041	2414	0.124	6.06061
Leptodactylus apepyta sp. nov.	LGE-B 004	Las Lomitas, Formosa, Argentina.	0.039	2414	0.115	6.49351
Leptodactylus apepyta sp. nov.	LGE-B 004	Las Lomitas, Formosa, Argentina.	0.045	2414	0.114	6.28931
Leptodactylus apepyta sp. nov.	LGE-B 004	Las Lomitas, Formosa, Argentina.	0.042	2414	0.124	6.0241
Leptodactylus apepyta sp. nov.	LGE-B 004	Las Lomitas, Formosa, Argentina.	0.044	2414	0.113	6.36943
Leptodactylus apepyta sp. nov.	LGE-B 004	Las Lomitas, Formosa, Argentina.	0.039	2414	0.117	6.41026
Leptodactylus apepyta sp. nov.	LGE-B 004	Las Lomitas, Formosa, Argentina.	0.042	2414	0.113	6.45161
Leptodactylus apepyta sp. nov.	LGE-B 004	Las Lomitas, Formosa, Argentina.	0.037	2414	0.113	6.66667
Leptodactylus apepyta sp. nov.	LGE-B 004	Las Lomitas, Formosa, Argentina.	0.04	2414	0.124	6.09756
Leptodactylus apepyta sp. nov.	LGE-B 004	Las Lomitas, Formosa, Argentina.	0.04	2414	0.113	6.53595
Leptodactylus apepyta sp. nov.	LGE-B 004	Las Lomitas, Formosa, Argentina.	0.04	2414	0.112	6.57895
Leptodactylus apepyta sp. nov.	LGE-B 004	Las Lomitas, Formosa, Argentina.	0.042	2414	0.113	6.45161
Leptodactylus apepyta sp. nov.	LGE-B 004	Las Lomitas, Formosa, Argentina.	0.059	2414	0.113	5.81395
Leptodactylus apepyta sp. nov.	LGE-B 004	Las Lomitas, Formosa, Argentina.	0.039	2393	0.12	6.28931
Leptodactylus apepyta sp. nov.	LGE-B 004	Las Lomitas, Formosa, Argentina.	0.038	2414	0.121	6.28931
Leptodactylus apepyta sp. nov.	LGE-B 004	Las Lomitas, Formosa, Argentina.	0.036	2393	0.124	6.25
Leptodactylus apepyta sp. nov.	LGE-B 004	Las Lomitas, Formosa, Argentina.	0.039	2414	0.121	6.25
Leptodactylus apepyta sp. nov.	LGE-B 004	Las Lomitas, Formosa, Argentina.	0.037	2393	0.124	6.21118
Leptodactylus apepyta sp. nov.	LGE-B 004	Las Lomitas, Formosa, Argentina.	0.037	2414	0.128	6.06061
Leptodactylus apepyta sp. nov.	LGE-B 004	Las Lomitas, Formosa, Argentina.	0.038	2393	0.128	6.0241
Leptodactylus apepyta sp. nov.	LGE-B 004	Las Lomitas, Formosa, Argentina.	0.042	2443	0.12	6.17284
Leptodactylus apepyta sp. nov.	LGE-B 004	Las Lomitas, Formosa, Argentina.	0.043	2414	0.12	6.13497
Leptodactylus apepyta sp. nov.	LGE-B 004	Las Lomitas, Formosa, Argentina.	0.04	2457	0.132	5.81395
Leptodactylus apepyta sp. nov.	LGE-B 004	Las Lomitas, Formosa, Argentina.	0.037	2457	0.132	5.91716
Leptodactylus apepyta sp. nov.	LGE-B 004	Las Lomitas, Formosa, Argentina.	0.044	2328	0.132	5.68182
Leptodactylus apepyta sp. nov.	LGE-B 004	Las Lomitas, Formosa, Argentina.	0.038	2328	0.151	5.29101
Leptodactylus apepyta sp. nov.	LGE-B 004	Las Lomitas, Formosa, Argentina.	0.036	2349	0.137	5.78035
Leptodactylus apepyta sp. nov.	LGE-B 004	Las Lomitas, Formosa, Argentina.	0.042	2349	0.137	5.58659
Leptodactylus apepyta sp. nov.	LGE-B 004	Las Lomitas, Formosa, Argentina.	0.039	2393	0.137	5.68182
Leptodactylus apepyta sp. nov.	LGE-B 004	Las Lomitas, Formosa, Argentina.	0.038	2393	0.131	5.91716
Leptodactylus apepyta sp. nov.	LGE-B 004	Las Lomitas, Formosa, Argentina.	0.039	2414	0.134	5.78035
Leptodactylus apepyta sp. nov.	LGE-B 004	Las Lomitas, Formosa, Argentina.	0.04	2414	0.134	5.74713
Leptodactylus apepyta sp. nov.	LGE-B 004	Las Lomitas, Formosa, Argentina.	0.059	2436	0.103	6.17284
Leptodactylus apepyta sp. nov.	LGE-B 004	Las Lomitas, Formosa, Argentina.	0.043	2436	0.115	6.32911
Leptodactylus apepyta sp. nov.	LGE-B 004	Las Lomitas, Formosa, Argentina.	0.045	2436	0.106	6.62252
Leptodactylus apepyta sp. nov.	LGE-B 004	Las Lomitas, Formosa, Argentina.	0.045	2436	0.106	6.62252
Leptodactylus apepyta sp. nov.	LGE-B 004	Las Lomitas, Formosa, Argentina.	0.048	2414	0.106	6.49351
Leptodactylus apepyta sp. nov.	LGE-B 004	Las Lomitas, Formosa, Argentina.	0.059	2414	0.095	6.49351
Leptodactylus apepyta sp. nov.	LGE-B 004	Las Lomitas, Formosa, Argentina.	0.064	2414	0.095	6.28931
Leptodactylus apepyta sp. nov.	LGE-B 004	Las Lomitas, Formosa, Argentina.	0.06	2414	0.096	6.41026
Leptodactylus apepyta sp. nov.	LGE-B 004	Las Lomitas, Formosa, Argentina.	0.058	2414	0.096	6.49351
Leptodactylus apepyta sp. nov.	LGE-B 004	Las Lomitas, Formosa, Argentina.	0.063	2414	0.097	6.25
Leptodactylus apepyta sp. nov.	LGE-B 004	Las Lomitas, Formosa, Argentina.	0.059	2436	0.093	6.57895
Leptodactylus apepyta sp. nov.	LGE-B 004	Las Lomitas, Formosa, Argentina.	0.068	2414	0.088	6.41026
Leptodactylus apepyta sp. nov.	LGE-B 004	Las Lomitas, Formosa, Argentina.	0.06	2414	0.088	6.75676
Leptodactylus apepyta sp. nov.	LGE-B 004	Las Lomitas, Formosa, Argentina.	0.064	2436	0.088	6.57895
Leptodactylus apepyta sp. nov.	LGE-B 004	Las Lomitas, Formosa, Argentina.	0.066	2414	0.088	6.49351
Leptodactylus apepyta sp. nov.	LGE-B 004	Las Lomitas, Formosa, Argentina.	0.045	2414	0.088	7.5188
Leptodactylus apepyta sp. nov.	LGE-B 005	Presidente Hayes, Paraguay.	0.039	2177	0.151	5.26316
Leptodactylus apepyta sp. nov.	LGE-B 005	Presidente Hayes, Paraguay.	0.036	2177	0.157	5.18135
Leptodactylus apepyta sp. nov.	LGE-B 005	Presidente Hayes, Paraguay.	0.033	2177	0.157	5.26316
Leptodactylus apepyta sp. nov.	LGE-B 005	Presidente Hayes, Paraguay.	0.037	2177	0.165	4.9505
Leptodactylus apepyta sp. nov.	LGE-B 005	Presidente Hayes, Paraguay.	0.035	2177	0.148	5.46448
Leptodactylus apepyta sp. nov.	LGE-B 005	Presidente Hayes, Paraguay.	0.039	2177	0.145	5.43478
Leptodactylus apepyta sp. nov.	LGE-B 005	Presidente Hayes, Paraguay.	0.039	2177	0.149	5.31915
Leptodactylus apepyta sp. nov.	LGE-B 005	Presidente Hayes, Paraguay.	0.042	2177	0.14	5.49451
Leptodactylus apepyta sp. nov.	LGE-B 005	Presidente Hayes, Paraguay.	0.04	2177	0.144	5.43478
Leptodactylus apepyta sp. nov.	LGE-B 005	Presidente Hayes, Paraguay.	0.042	2177	0.141	5.46448
Leptodactylus apepyta sp. nov.	LGE-B 005	Presidente Hayes, Paraguay.	0.046	2177	0.135	5.52486
Leptodactylus apepyta sp. nov.	LGE-B 005	Presidente Hayes, Paraguay.	0.039	2177	0.144	5.46448
Leptodactylus apepyta sp. nov.	LGE-B 005	Presidente Hayes, Paraguay.	0.056	2177	0.122	5.61798
Leptodactylus apepyta sp. nov.	LGE-B 005	Presidente Hayes, Paraguay.	0.043	2177	0.143	5.37634
Leptodactylus apepyta sp. nov.	LGE-B 005	Presidente Hayes, Paraguay.	0.042	2177	0.145	5.34759
Leptodactylus apepyta sp. nov.	LGE-B 005	Presidente Hayes, Paraguay.	0.041	2177	0.147	5.31915
Leptodactylus apepyta sp. nov.	LGE-B 005	Presidente Hayes, Paraguay.	0.042	2177	0.133	5.71429
Leptodactylus apepyta sp. nov.	LGE-B 005	Presidente Hayes, Paraguay.	0.042	2177	0.146	5.31915
Leptodactylus apepyta sp. nov.	LGE-B 005	Presidente Hayes, Paraguay.	0.043	2177	0.133	5.68182
Leptodactylus apepyta sp. nov.	LGE-B 005	Presidente Hayes, Paraguay.	0.04	2177	0.145	5.40541
Leptodactylus apepyta sp. nov.	LGE-B 005	Presidente Hayes, Paraguay.	0.041	2177	0.145	5.37634
Leptodactylus apepyta sp. nov.	LGE-B 005	Presidente Hayes, Paraguay.	0.042	2177	0.137	5.58659
Leptodactylus apepyta sp. nov.	LGE-B 005	Presidente Hayes, Paraguay.	0.042	2177	0.137	5.58659
Leptodactylus apepyta sp. nov.	LGE-B 005	Presidente Hayes, Paraguay.	0.04	2177	0.135	5.71429
Leptodactylus apepyta sp. nov.	LGE-B 005	Presidente Hayes, Paraguay.	0.041	2177	0.131	5.81395
Leptodactylus apepyta sp. nov.	LGE-B 005	Presidente Hayes, Paraguay.	0.039	2155	0.138	5.64972
Leptodactylus apepyta sp. nov.	LGE-B 005	Presidente Hayes, Paraguay.	0.038	2177	0.139	5.64972
Leptodactylus apepyta sp. nov.	LGE-B 005	Presidente Hayes, Paraguay.	0.041	2177	0.141	5.49451
Leptodactylus apepyta sp. nov.	LGE-B 005	Presidente Hayes, Paraguay.	0.039	2177	0.135	5.74713
Leptodactylus apepyta sp. nov.	LGE-B 005	Presidente Hayes, Paraguay.	0.039	2177	0.145	5.43478
Leptodactylus apepyta sp. nov.	LGE-B 005	Presidente Hayes, Paraguay.	0.038	2177	0.134	5.81395
Leptodactylus apepyta sp. nov.	LGE-B 005	Presidente Hayes, Paraguay.	0.038	2177	0.138	5.68182
Leptodactylus apepyta sp. nov.	LGE-B 005	Presidente Hayes, Paraguay.	0.038	2177	0.138	5.68182
Leptodactylus apepyta sp. nov.	LGE-B 005	Presidente Hayes, Paraguay.	0.044	2177	0.14	5.43478
Leptodactylus apepyta sp. nov.	LGE-B 005	Presidente Hayes, Paraguay.	0.044	2155	0.138	5.49451
Leptodactylus apepyta sp. nov.	LGE-B 005	Presidente Hayes, Paraguay.	0.04	2177	0.141	5.52486
Leptodactylus apepyta sp. nov.	LGE-B 005	Presidente Hayes, Paraguay.	0.039	2177	0.138	5.64972
Leptodactylus apepyta sp. nov.	LGE-B 005	Presidente Hayes, Paraguay.	0.039	2177	0.136	5.71429
Leptodactylus apepyta sp. nov.	LGE-B 005	Presidente Hayes, Paraguay.	0.043	2177	0.131	5.74713
Leptodactylus apepyta sp. nov.	LGE-B 005	Presidente Hayes, Paraguay.	0.045	2177	0.136	5.52486
Leptodactylus apepyta sp. nov.	LGE-B 005	Presidente Hayes, Paraguay.	0.038	2177	0.144	5.49451
Leptodactylus apepyta sp. nov.	LGE-B 005	Presidente Hayes, Paraguay.	0.039	2177	0.142	5.52486
Leptodactylus apepyta sp. nov.	LGE-B 005	Presidente Hayes, Paraguay.	0.041	2177	0.137	5.61798
Leptodactylus apepyta sp. nov.	LGE-B 005	Presidente Hayes, Paraguay.	0.041	2155	0.136	5.64972
Leptodactylus apepyta sp. nov.	LGE-B 005	Presidente Hayes, Paraguay.	0.042	2177	0.136	5.61798
Leptodactylus apepyta sp. nov.	LGE-B 005	Presidente Hayes, Paraguay.	0.044	2177	0.134	5.61798
Leptodactylus apepyta sp. nov.	LGE-B 005	Presidente Hayes, Paraguay.	0.039	2177	0.145	5.43478
Leptodactylus apepyta sp. nov.	LGE-B 005	Presidente Hayes, Paraguay.	0.041	2177	0.137	5.61798
Leptodactylus apepyta sp. nov.	LGE-B 005	Presidente Hayes, Paraguay.	0.037	2177	0.142	5.58659
Leptodactylus apepyta sp. nov.	LGE-B 005	Presidente Hayes, Paraguay.	0.046	2177	0.142	5.31915
Leptodactylus mystacinus	LGE-B 006	Colonia Victoria, Misiones, Argentina.	0.044	2166	0.121	6.06061
Leptodactylus mystacinus	LGE-B 006	Colonia Victoria, Misiones, Argentina.	0.038	2185	0.168	4.85437
Leptodactylus mystacinus	LGE-B 006	Colonia Victoria, Misiones, Argentina.	0.04	2185	0.135	5.71429
Leptodactylus mystacinus	LGE-B 006	Colonia Victoria, Misiones, Argentina.	0.039	2166	0.132	5.84795
Leptodactylus mystacinus	LGE-B 006	Colonia Victoria, Misiones, Argentina.	0.039	2185	0.115	6.49351
Leptodactylus mystacinus	LGE-B 006	Colonia Victoria, Misiones, Argentina.	0.042	2222	0.119	6.21118
Leptodactylus mystacinus	LGE-B 006	Colonia Victoria, Misiones, Argentina.	0.041	2203	0.118	6.28931
Leptodactylus mystacinus	LGE-B 006	Colonia Victoria, Misiones, Argentina.	0.042	2185	0.146	5.31915
Leptodactylus mystacinus	LGE-B 006	Colonia Victoria, Misiones, Argentina.	0.043	2203	0.121	6.09756
Leptodactylus mystacinus	LGE-B 006	Colonia Victoria, Misiones, Argentina.	0.037	2129	0.127	6.09756
Leptodactylus mystacinus	LGE-B 006	Colonia Victoria, Misiones, Argentina.	0.043	2166	0.126	5.91716
Leptodactylus mystacinus	LGE-B 006	Colonia Victoria, Misiones, Argentina.	0.037	2129	0.138	5.71429
Leptodactylus mystacinus	LGE-B 006	Colonia Victoria, Misiones, Argentina.	0.038	2166	0.141	5.58659
Leptodactylus mystacinus	LGE-B 006	Colonia Victoria, Misiones, Argentina.	0.041	2320	0.119	6.25
Leptodactylus mystacinus	LGE-B 006	Colonia Victoria, Misiones, Argentina.	0.044	2281	0.119	6.13497
Leptodactylus mystacinus	LGE-B 006	Colonia Victoria, Misiones, Argentina.	0.043	2281	0.109	6.57895
Leptodactylus mystacinus	LGE-B 006	Colonia Victoria, Misiones, Argentina.	0.042	2281	0.11	6.57895
Leptodactylus mystacinus	LGE-B 006	Colonia Victoria, Misiones, Argentina.	0.038	2281	0.114	6.57895
Leptodactylus mystacinus	LGE-B 006	Colonia Victoria, Misiones, Argentina.	0.04	2281	0.112	6.57895
Leptodactylus mystacinus	LGE-B 006	Colonia Victoria, Misiones, Argentina.	0.038	2320	0.115	6.53595
Leptodactylus mystacinus	LGE-B 006	Colonia Victoria, Misiones, Argentina.	0.041	2281	0.112	6.53595
Leptodactylus mystacinus	LGE-B 006	Colonia Victoria, Misiones, Argentina.	0.04	2261	0.113	6.53595
Leptodactylus mystacinus	LGE-B 006	Colonia Victoria, Misiones, Argentina.	0.04	2261	0.128	5.95238
Leptodactylus mystacinus	LGE-B 006	Colonia Victoria, Misiones, Argentina.	0.04	2261	0.115	6.45161
Leptodactylus mystacinus	LGE-B 006	Colonia Victoria, Misiones, Argentina.	0.036	2281	0.145	5.52486
Leptodactylus mystacinus	LGE-B 006	Colonia Victoria, Misiones, Argentina.	0.038	2281	0.096	7.46269
Leptodactylus mystacinus	LGE-B 006	Colonia Victoria, Misiones, Argentina.	0.038	2281	0.108	6.84932
Leptodactylus mystacinus	LGE-B 006	Colonia Victoria, Misiones, Argentina.	0.038	2281	0.114	6.57895
Leptodactylus mystacinus	LGE-B 006	Colonia Victoria, Misiones, Argentina.	0.036	2300	0.114	6.66667
Leptodactylus mystacinus	LGE-B 006	Colonia Victoria, Misiones, Argentina.	0.037	2320	0.105	7.04225
Leptodactylus mystacinus	LGE-B 007	Colonia Victoria, Misiones, Argentina.	0.037	2185	0.125	6.17284
Leptodactylus mystacinus	LGE-B 007	Colonia Victoria, Misiones, Argentina.	0.04	2147	0.112	6.57895
Leptodactylus mystacinus	LGE-B 007	Colonia Victoria, Misiones, Argentina.	0.044	2203	0.111	6.45161
Leptodactylus mystacinus	LGE-B 007	Colonia Victoria, Misiones, Argentina.	0.038	2185	0.136	5.74713
Leptodactylus mystacinus	LGE-B 007	Colonia Victoria, Misiones, Argentina.	0.041	2185	0.144	5.40541
Leptodactylus mystacinus	LGE-B 007	Colonia Victoria, Misiones, Argentina.	0.042	2203	0.13	5.81395
Leptodactylus mystacinus	LGE-B 007	Colonia Victoria, Misiones, Argentina.	0.041	2185	0.096	7.29927
Leptodactylus mystacinus	LGE-B 007	Colonia Victoria, Misiones, Argentina.	0.04	2185	0.114	6.49351
Leptodactylus mystacinus	LGE-B 007	Colonia Victoria, Misiones, Argentina.	0.041	2203	0.118	6.28931
Leptodactylus mystacinus	LGE-B 007	Colonia Victoria, Misiones, Argentina.	0.042	2242	0.119	6.21118
Leptodactylus mystacinus	LGE-B 007	Colonia Victoria, Misiones, Argentina.	0.038	2281	0.136	5.74713
Leptodactylus mystacinus	LGE-B 007	Colonia Victoria, Misiones, Argentina.	0.041	2281	0.138	5.58659
Leptodactylus mystacinus	LGE-B 007	Colonia Victoria, Misiones, Argentina.	0.04	2242	0.118	6.32911
Leptodactylus mystacinus	LGE-B 007	Colonia Victoria, Misiones, Argentina.	0.038	2242	0.121	6.28931
Leptodactylus mystacinus	LGE-B 007	Colonia Victoria, Misiones, Argentina.	0.039	2242	0.137	5.68182
Leptodactylus mystacinus	LGE-B 007	Colonia Victoria, Misiones, Argentina.	0.044	2146	0.125	5.91716
Leptodactylus mystacinus	LGE-B 007	Colonia Victoria, Misiones, Argentina.	0.04	2242	0.155	5.12821
Leptodactylus mystacinus	LGE-B 007	Colonia Victoria, Misiones, Argentina.	0.042	2230	0.097	7.19424
Leptodactylus mystacinus	LGE-B 007	Colonia Victoria, Misiones, Argentina.	0.044	2242	0.099	6.99301
Leptodactylus mystacinus	LGE-B 007	Colonia Victoria, Misiones, Argentina.	0.041	2146	0.101	7.04225
Leptodactylus mystacinus	LGE-B 007	Colonia Victoria, Misiones, Argentina.	0.041	2146	0.102	6.99301
Leptodactylus mystacinus	LGE-B 007	Colonia Victoria, Misiones, Argentina.	0.042	2203	0.104	6.84932
Leptodactylus mystacinus	LGE-B 007	Colonia Victoria, Misiones, Argentina.	0.042	2147	0.104	6.84932
Leptodactylus mystacinus	LGE-B 007	Colonia Victoria, Misiones, Argentina.	0.038	2222	0.111	6.71141
Leptodactylus mystacinus	LGE-B 007	Colonia Victoria, Misiones, Argentina.	0.038	2242	0.098	7.35294
Leptodactylus mystacinus	LGE-B 007	Colonia Victoria, Misiones, Argentina.	0.039	2224	0.108	6.80272
Leptodactylus mystacinus	LGE-B 007	Colonia Victoria, Misiones, Argentina.	0.04	2161	0.112	6.57895
Leptodactylus mystacinus	LGE-B 007	Colonia Victoria, Misiones, Argentina.	0.041	2161	0.108	6.71141
Leptodactylus mystacinus	LGE-B 007	Colonia Victoria, Misiones, Argentina.	0.041	2222	0.132	5.78035
Leptodactylus mystacinus	LGE-B 007	Colonia Victoria, Misiones, Argentina.	0.04	2222	0.117	6.36943
Leptodactylus mystacinus	LGE-B 008	Rosario, Santa Fe, Argentina.	0.039	2281	0.108	6.80272
Leptodactylus mystacinus	LGE-B 008	Rosario, Santa Fe, Argentina.	0.038	2300	0.12	6.32911
Leptodactylus mystacinus	LGE-B 008	Rosario, Santa Fe, Argentina.	0.04	2300	0.117	6.36943
Leptodactylus mystacinus	LGE-B 008	Rosario, Santa Fe, Argentina.	0.044	2300	0.107	6.62252
Leptodactylus mystacinus	LGE-B 008	Rosario, Santa Fe, Argentina.	0.037	2281	0.117	6.49351
Leptodactylus mystacinus	LGE-B 008	Rosario, Santa Fe, Argentina.	0.036	2281	0.117	6.53595
Leptodactylus mystacinus	LGE-B 008	Rosario, Santa Fe, Argentina.	0.035	2300	0.121	6.41026
Leptodactylus mystacinus	LGE-B 008	Rosario, Santa Fe, Argentina.	0.037	2267	0.115	6.57895
Leptodactylus mystacinus	LGE-B 008	Rosario, Santa Fe, Argentina.	0.038	2281	0.114	6.57895
Leptodactylus mystacinus	LGE-B 008	Rosario, Santa Fe, Argentina.	0.042	2261	0.109	6.62252
Leptodactylus mystacinus	LGE-B 008	Rosario, Santa Fe, Argentina.	0.035	2281	0.117	6.57895
Leptodactylus mystacinus	LGE-B 008	Rosario, Santa Fe, Argentina.	0.038	2300	0.118	6.41026
Leptodactylus mystacinus	LGE-B 008	Rosario, Santa Fe, Argentina.	0.039	2300	0.117	6.41026
Leptodactylus mystacinus	LGE-B 008	Rosario, Santa Fe, Argentina.	0.04	2261	0.114	6.49351
Leptodactylus mystacinus	LGE-B 008	Rosario, Santa Fe, Argentina.	0.039	2261	0.114	6.53595
Leptodactylus mystacinus	LGE-B 008	Rosario, Santa Fe, Argentina.	0.037	2281	0.114	6.62252
Leptodactylus mystacinus	LGE-B 008	Rosario, Santa Fe, Argentina.	0.036	2300	0.115	6.62252
Leptodactylus mystacinus	LGE-B 008	Rosario, Santa Fe, Argentina.	0.04	2261	0.114	6.49351
Leptodactylus mystacinus	LGE-B 008	Rosario, Santa Fe, Argentina.	0.035	2261	0.118	6.53595
Leptodactylus mystacinus	LGE-B 008	Rosario, Santa Fe, Argentina.	0.036	2222	0.117	6.53595
Leptodactylus mystacinus	LGE-B 008	Rosario, Santa Fe, Argentina.	0.039	2222	0.12	6.28931
Leptodactylus mystacinus	LGE-B 008	Rosario, Santa Fe, Argentina.	0.038	2242	0.118	6.41026
Leptodactylus mystacinus	LGE-B 008	Rosario, Santa Fe, Argentina.	0.041	2242	0.113	6.49351
Leptodactylus mystacinus	LGE-B 008	Rosario, Santa Fe, Argentina.	0.04	2281	0.111	6.62252
Leptodactylus mystacinus	LGE-B 008	Rosario, Santa Fe, Argentina.	0.037	2281	0.115	6.57895
Leptodactylus mystacinus	LGE-B 008	Rosario, Santa Fe, Argentina.	0.035	2281	0.118	6.53595
Leptodactylus mystacinus	LGE-B 008	Rosario, Santa Fe, Argentina.	0.037	2281	0.127	6.09756
Leptodactylus mystacinus	LGE-B 008	Rosario, Santa Fe, Argentina.	0.042	2242	0.119	6.21118
Leptodactylus mystacinus	LGE-B 008	Rosario, Santa Fe, Argentina.	0.042	2281	0.115	6.36943
Leptodactylus mystacinus	LGE-B 008	Rosario, Santa Fe, Argentina.	0.037	2281	0.116	6.53595
Leptodactylus mystacinus	LGE-B 009	Rosario, Santa Fe, Argentina.	0.049	2281	0.161	4.7619
Leptodactylus mystacinus	LGE-B 009	Rosario, Santa Fe, Argentina.	0.055	2261	0.185	4.16667
Leptodactylus mystacinus	LGE-B 009	Rosario, Santa Fe, Argentina.	0.053	2300	0.174	4.40529
Leptodactylus mystacinus	LGE-B 009	Rosario, Santa Fe, Argentina.	0.052	2281	0.176	4.38596
Leptodactylus mystacinus	LGE-B 009	Rosario, Santa Fe, Argentina.	0.054	2281	0.183	4.21941
Leptodactylus mystacinus	LGE-B 009	Rosario, Santa Fe, Argentina.	0.056	2300	0.165	4.52489
Leptodactylus mystacinus	LGE-B 009	Rosario, Santa Fe, Argentina.	0.05	2261	0.17	4.54545
Leptodactylus mystacinus	LGE-B 009	Rosario, Santa Fe, Argentina.	0.051	2281	0.177	4.38596
Leptodactylus mystacinus	LGE-B 009	Rosario, Santa Fe, Argentina.	0.053	2281	0.181	4.2735
Leptodactylus mystacinus	LGE-B 009	Rosario, Santa Fe, Argentina.	0.054	2261	0.187	4.14938
Leptodactylus mystacinus	LGE-B 009	Rosario, Santa Fe, Argentina.	0.051	2281	0.162	4.69484
Leptodactylus mystacinus	LGE-B 009	Rosario, Santa Fe, Argentina.	0.052	2281	0.169	4.52489
Leptodactylus mystacinus	LGE-B 009	Rosario, Santa Fe, Argentina.	0.053	2320	0.171	4.46429
Leptodactylus mystacinus	LGE-B 009	Rosario, Santa Fe, Argentina.	0.05	2281	0.167	4.60829
Leptodactylus mystacinus	LGE-B 009	Rosario, Santa Fe, Argentina.	0.056	2281	0.176	4.31034
Leptodactylus mystacinus	LGE-B 009	Rosario, Santa Fe, Argentina.	0.056	2281	0.171	4.40529
Leptodactylus mystacinus	LGE-B 009	Rosario, Santa Fe, Argentina.	0.054	2261	0.161	4.65116
Leptodactylus mystacinus	LGE-B 009	Rosario, Santa Fe, Argentina.	0.054	2261	0.166	4.54545
Leptodactylus mystacinus	LGE-B 009	Rosario, Santa Fe, Argentina.	0.054	2261	0.181	4.25532
Leptodactylus mystacinus	LGE-B 009	Rosario, Santa Fe, Argentina.	0.055	2242	0.18	4.25532
Leptodactylus mystacinus	LGE-B 009	Rosario, Santa Fe, Argentina.	0.058	2300	0.172	4.34783
Leptodactylus mystacinus	LGE-B 009	Rosario, Santa Fe, Argentina.	0.054	2261	0.171	4.44444
Leptodactylus mystacinus	LGE-B 009	Rosario, Santa Fe, Argentina.	0.058	2281	0.181	4.1841
Leptodactylus mystacinus	LGE-B 009	Rosario, Santa Fe, Argentina.	0.058	2300	0.171	4.36681
Leptodactylus mystacinus	LGE-B 009	Rosario, Santa Fe, Argentina.	0.057	2281	0.176	4.29185
Leptodactylus mystacinus	LGE-B 009	Rosario, Santa Fe, Argentina.	0.051	2281	0.171	4.5045
Leptodactylus mystacinus	LGE-B 009	Rosario, Santa Fe, Argentina.	0.053	2320	0.195	4.03226
Leptodactylus mystacinus	LGE-B 009	Rosario, Santa Fe, Argentina.	0.051	2281	0.199	4
Leptodactylus mystacinus	LGE-B 009	Rosario, Santa Fe, Argentina.	0.055	2281	0.179	4.2735
Leptodactylus mystacinus	LGE-B 009	Rosario, Santa Fe, Argentina.	0.057	2281	0.175	4.31034
Leptodactylus mystacinus	LGE-B 010	Rosario, Santa Fe, Argentina.	0.031	2245	0.137	5.95238
Leptodactylus mystacinus	LGE-B 010	Rosario, Santa Fe, Argentina.	0.031	2192	0.133	6.09756
Leptodactylus mystacinus	LGE-B 010	Rosario, Santa Fe, Argentina.	0.032	2214	0.137	5.91716
Leptodactylus mystacinus	LGE-B 010	Rosario, Santa Fe, Argentina.	0.031	2259	0.14	5.84795
Leptodactylus mystacinus	LGE-B 010	Rosario, Santa Fe, Argentina.	0.037	2242	0.137	5.74713
Leptodactylus mystacinus	LGE-B 010	Rosario, Santa Fe, Argentina.	0.034	2242	0.143	5.64972
Leptodactylus mystacinus	LGE-B 010	Rosario, Santa Fe, Argentina.	0.031	2261	0.16	5.2356
Leptodactylus mystacinus	LGE-B 010	Rosario, Santa Fe, Argentina.	0.034	2242	0.161	5.12821
Leptodactylus mystacinus	LGE-B 010	Rosario, Santa Fe, Argentina.	0.032	2261	0.166	5.05051
Leptodactylus mystacinus	LGE-B 010	Rosario, Santa Fe, Argentina.	0.032	2261	0.136	5.95238
Leptodactylus mystacinus	LGE-B 010	Rosario, Santa Fe, Argentina.	0.031	2261	0.137	5.95238
Leptodactylus mystacinus	LGE-B 010	Rosario, Santa Fe, Argentina.	0.031	2261	0.131	6.17284
Leptodactylus mystacinus	LGE-B 010	Rosario, Santa Fe, Argentina.	0.03	2300	0.135	6.06061
Leptodactylus mystacinus	LGE-B 010	Rosario, Santa Fe, Argentina.	0.03	2300	0.133	6.13497
Leptodactylus mystacinus	LGE-B 010	Rosario, Santa Fe, Argentina.	0.031	2261	0.133	6.09756
Leptodactylus mystacinus	LGE-B 010	Rosario, Santa Fe, Argentina.	0.031	2261	0.15	5.52486
Leptodactylus mystacinus	LGE-B 010	Rosario, Santa Fe, Argentina.	0.031	2300	0.137	5.95238
Leptodactylus mystacinus	LGE-B 010	Rosario, Santa Fe, Argentina.	0.033	2281	0.135	5.95238
Leptodactylus mystacinus	LGE-B 010	Rosario, Santa Fe, Argentina.	0.031	2261	0.137	5.95238
Leptodactylus mystacinus	LGE-B 010	Rosario, Santa Fe, Argentina.	0.033	2261	0.133	6.0241
Leptodactylus mystacinus	LGE-B 010	Rosario, Santa Fe, Argentina.	0.035	2281	0.146	5.52486
Leptodactylus mystacinus	LGE-B 010	Rosario, Santa Fe, Argentina.	0.036	2281	0.146	5.49451
Leptodactylus mystacinus	LGE-B 010	Rosario, Santa Fe, Argentina.	0.032	2281	0.146	5.61798
Leptodactylus mystacinus	LGE-B 010	Rosario, Santa Fe, Argentina.	0.034	2281	0.142	5.68182
Leptodactylus mystacinus	LGE-B 010	Rosario, Santa Fe, Argentina.	0.034	2300	0.141	5.71429
Leptodactylus mystacinus	LGE-B 010	Rosario, Santa Fe, Argentina.	0.036	2281	0.136	5.81395
Leptodactylus mystacinus	LGE-B 010	Rosario, Santa Fe, Argentina.	0.033	2281	0.142	5.71429
Leptodactylus mystacinus	LGE-B 010	Rosario, Santa Fe, Argentina.	0.034	2281	0.145	5.58659
Leptodactylus mystacinus	LGE-B 010	Rosario, Santa Fe, Argentina.	0.032	2300	0.148	5.55556
Leptodactylus mystacinus	LGE-B 010	Rosario, Santa Fe, Argentina.	0.034	2261	0.151	5.40541
Leptodactylus mystacinus	LGE-B 011	Rosario, Santa Fe, Argentina.	0.031	2507	0.146	5.64972
Leptodactylus mystacinus	LGE-B 011	Rosario, Santa Fe, Argentina.	0.03	2572	0.14	5.88235
Leptodactylus mystacinus	LGE-B 011	Rosario, Santa Fe, Argentina.	0.032	2528	0.138	5.88235
Leptodactylus mystacinus	LGE-B 011	Rosario, Santa Fe, Argentina.	0.032	2550	0.14	5.81395
Leptodactylus mystacinus	LGE-B 011	Rosario, Santa Fe, Argentina.	0.033	2507	0.137	5.88235
Leptodactylus mystacinus	LGE-B 011	Rosario, Santa Fe, Argentina.	0.034	2485	0.141	5.71429
Leptodactylus mystacinus	LGE-B 011	Rosario, Santa Fe, Argentina.	0.034	2485	0.146	5.55556
Leptodactylus mystacinus	LGE-B 011	Rosario, Santa Fe, Argentina.	0.032	2528	0.141	5.78035
Leptodactylus mystacinus	LGE-B 011	Rosario, Santa Fe, Argentina.	0.032	2528	0.142	5.74713
Leptodactylus mystacinus	LGE-B 011	Rosario, Santa Fe, Argentina.	0.028	2507	0.147	5.71429
Leptodactylus mystacinus	LGE-B 011	Rosario, Santa Fe, Argentina.	0.027	2528	0.143	5.88235
Leptodactylus mystacinus	LGE-B 011	Rosario, Santa Fe, Argentina.	0.035	2485	0.141	5.68182
Leptodactylus mystacinus	LGE-B 011	Rosario, Santa Fe, Argentina.	0.032	2528	0.141	5.78035
Leptodactylus mystacinus	LGE-B 011	Rosario, Santa Fe, Argentina.	0.031	2528	0.14	5.84795
Leptodactylus mystacinus	LGE-B 011	Rosario, Santa Fe, Argentina.	0.028	2528	0.144	5.81395
Leptodactylus mystacinus	LGE-B 011	Rosario, Santa Fe, Argentina.	0.029	2528	0.146	5.71429
Leptodactylus mystacinus	LGE-B 011	Rosario, Santa Fe, Argentina.	0.03	2485	0.154	5.43478
Leptodactylus mystacinus	LGE-B 011	Rosario, Santa Fe, Argentina.	0.031	2485	0.15	5.52486
Leptodactylus mystacinus	LGE-B 011	Rosario, Santa Fe, Argentina.	0.03	2507	0.152	5.49451
Leptodactylus mystacinus	LGE-B 011	Rosario, Santa Fe, Argentina.	0.031	2528	0.147	5.61798
Leptodactylus mystacinus	LGE-B 011	Rosario, Santa Fe, Argentina.	0.03	2528	0.147	5.64972
Leptodactylus mystacinus	LGE-B 011	Rosario, Santa Fe, Argentina.	0.031	2507	0.154	5.40541
Leptodactylus mystacinus	LGE-B 011	Rosario, Santa Fe, Argentina.	0.033	2485	0.099	7.57576
Leptodactylus mystacinus	LGE-B 011	Rosario, Santa Fe, Argentina.	0.034	2507	0.099	7.5188
Leptodactylus mystacinus	LGE-B 011	Rosario, Santa Fe, Argentina.	0.033	2507	0.099	7.57576
Leptodactylus mystacinus	LGE-B 011	Rosario, Santa Fe, Argentina.	0.029	2507	0.111	7.14286
Leptodactylus mystacinus	LGE-B 011	Rosario, Santa Fe, Argentina.	0.03	2507	0.107	7.29927
Leptodactylus mystacinus	LGE-B 011	Rosario, Santa Fe, Argentina.	0.029	2507	0.11	7.19424
Leptodactylus mystacinus	LGE-B 011	Rosario, Santa Fe, Argentina.	0.028	2507	0.111	7.19424
Leptodactylus mystacinus	LGE-B 011	Rosario, Santa Fe, Argentina.	0.029	2485	0.116	6.89655
Leptodactylus mystacinus	LGE-B 012	Rosario, Santa Fe, Argentina.	0.034	2242	0.133	5.98802
Leptodactylus mystacinus	LGE-B 012	Rosario, Santa Fe, Argentina.	0.027	2242	0.148	5.71429
Leptodactylus mystacinus	LGE-B 012	Rosario, Santa Fe, Argentina.	0.036	2185	0.184	4.54545
Leptodactylus mystacinus	LGE-B 012	Rosario, Santa Fe, Argentina.	0.031	2203	0.194	4.44444
Leptodactylus mystacinus	LGE-B 012	Rosario, Santa Fe, Argentina.	0.033	2261	0.154	5.34759
Leptodactylus mystacinus	LGE-B 012	Rosario, Santa Fe, Argentina.	0.034	2261	0.151	5.40541
Leptodactylus mystacinus	LGE-B 012	Rosario, Santa Fe, Argentina.	0.031	2261	0.157	5.31915
Leptodactylus mystacinus	LGE-B 012	Rosario, Santa Fe, Argentina.	0.035	2222	0.154	5.29101
Leptodactylus mystacinus	LGE-B 012	Rosario, Santa Fe, Argentina.	0.034	2203	0.157	5.2356
Leptodactylus mystacinus	LGE-B 012	Rosario, Santa Fe, Argentina.	0.029	2166	0.16	5.29101
Leptodactylus mystacinus	LGE-B 012	Rosario, Santa Fe, Argentina.	0.031	2185	0.152	5.46448
Leptodactylus mystacinus	LGE-B 012	Rosario, Santa Fe, Argentina.	0.031	2185	0.171	4.9505
Leptodactylus mystacinus	LGE-B 012	Rosario, Santa Fe, Argentina.	0.033	2166	0.221	3.93701
Leptodactylus mystacinus	LGE-B 012	Rosario, Santa Fe, Argentina.	0.034	2111	0.143	5.64972
Leptodactylus mystacinus	LGE-B 012	Rosario, Santa Fe, Argentina.	0.038	2185	0.148	5.37634
Leptodactylus mystacinus	LGE-B 012	Rosario, Santa Fe, Argentina.	0.034	2185	0.15	5.43478
Leptodactylus mystacinus	LGE-B 012	Rosario, Santa Fe, Argentina.	0.03	2185	0.175	4.87805
Leptodactylus mystacinus	LGE-B 012	Rosario, Santa Fe, Argentina.	0.03	2242	0.171	4.97512
Leptodactylus mystacinus	LGE-B 012	Rosario, Santa Fe, Argentina.	0.032	2147	0.159	5.2356
Leptodactylus mystacinus	LGE-B 012	Rosario, Santa Fe, Argentina.	0.035	2166	0.139	5.74713
Leptodactylus mystacinus	LGE-B 012	Rosario, Santa Fe, Argentina.	0.036	2222	0.138	5.74713
Leptodactylus mystacinus	LGE-B 012	Rosario, Santa Fe, Argentina.	0.038	2185	0.17	4.80769
Leptodactylus mystacinus	LGE-B 012	Rosario, Santa Fe, Argentina.	0.037	2261	0.132	5.91716
Leptodactylus mystacinus	LGE-B 012	Rosario, Santa Fe, Argentina.	0.041	2203	0.126	5.98802
Leptodactylus mystacinus	LGE-B 012	Rosario, Santa Fe, Argentina.	0.039	2222	0.128	5.98802
Leptodactylus mystacinus	LGE-B 012	Rosario, Santa Fe, Argentina.	0.04	2281	0.127	5.98802
Leptodactylus mystacinus	LGE-B 012	Rosario, Santa Fe, Argentina.	0.037	2185	0.136	5.78035
Leptodactylus mystacinus	LGE-B 012	Rosario, Santa Fe, Argentina.	0.035	2242	0.124	6.28931
Leptodactylus mystacinus	LGE-B 012	Rosario, Santa Fe, Argentina.	0.036	2242	0.122	6.32911
Leptodactylus mystacinus	LGE-B 012	Rosario, Santa Fe, Argentina.	0.038	2185	0.129	5.98802
Leptodactylus mystacinus	LGE-B 013	Rosario, Santa Fe, Argentina.	0.056	2281	0.171	4.40529
Leptodactylus mystacinus	LGE-B 013	Rosario, Santa Fe, Argentina.	0.054	2261	0.161	4.65116
Leptodactylus mystacinus	LGE-B 013	Rosario, Santa Fe, Argentina.	0.054	2261	0.166	4.54545
Leptodactylus mystacinus	LGE-B 013	Rosario, Santa Fe, Argentina.	0.054	2261	0.181	4.25532
Leptodactylus mystacinus	LGE-B 013	Rosario, Santa Fe, Argentina.	0.055	2242	0.18	4.25532
Leptodactylus mystacinus	LGE-B 013	Rosario, Santa Fe, Argentina.	0.058	2300	0.172	4.34783
Leptodactylus mystacinus	LGE-B 013	Rosario, Santa Fe, Argentina.	0.054	2261	0.171	4.44444
Leptodactylus mystacinus	LGE-B 013	Rosario, Santa Fe, Argentina.	0.058	2281	0.181	4.1841
Leptodactylus mystacinus	LGE-B 013	Rosario, Santa Fe, Argentina.	0.058	2300	0.171	4.36681
Leptodactylus mystacinus	LGE-B 013	Rosario, Santa Fe, Argentina.	0.057	2281	0.176	4.29185
Leptodactylus mystacinus	LGE-B 013	Rosario, Santa Fe, Argentina.	0.051	2281	0.171	4.5045
Leptodactylus mystacinus	LGE-B 013	Rosario, Santa Fe, Argentina.	0.053	2320	0.195	4.03226
Leptodactylus mystacinus	LGE-B 013	Rosario, Santa Fe, Argentina.	0.051	2281	0.199	4
Leptodactylus mystacinus	LGE-B 013	Rosario, Santa Fe, Argentina.	0.055	2281	0.179	4.2735
Leptodactylus mystacinus	LGE-B 013	Rosario, Santa Fe, Argentina.	0.057	2281	0.175	4.31034
Leptodactylus mystacinus	LGE-B 013	Rosario, Santa Fe, Argentina.	0.037	2281	0.114	6.62252
Leptodactylus mystacinus	LGE-B 013	Rosario, Santa Fe, Argentina.	0.036	2300	0.115	6.62252
Leptodactylus mystacinus	LGE-B 013	Rosario, Santa Fe, Argentina.	0.04	2261	0.114	6.49351
Leptodactylus mystacinus	LGE-B 013	Rosario, Santa Fe, Argentina.	0.035	2261	0.118	6.53595
Leptodactylus mystacinus	LGE-B 013	Rosario, Santa Fe, Argentina.	0.036	2222	0.117	6.53595
Leptodactylus mystacinus	LGE-B 013	Rosario, Santa Fe, Argentina.	0.039	2222	0.12	6.28931
Leptodactylus mystacinus	LGE-B 013	Rosario, Santa Fe, Argentina.	0.038	2242	0.118	6.41026
Leptodactylus mystacinus	LGE-B 013	Rosario, Santa Fe, Argentina.	0.041	2242	0.113	6.49351
Leptodactylus mystacinus	LGE-B 013	Rosario, Santa Fe, Argentina.	0.04	2281	0.111	6.62252
Leptodactylus mystacinus	LGE-B 013	Rosario, Santa Fe, Argentina.	0.037	2281	0.115	6.57895
Leptodactylus mystacinus	LGE-B 013	Rosario, Santa Fe, Argentina.	0.035	2281	0.118	6.53595
Leptodactylus mystacinus	LGE-B 013	Rosario, Santa Fe, Argentina.	0.037	2281	0.127	6.09756
Leptodactylus mystacinus	LGE-B 013	Rosario, Santa Fe, Argentina.	0.042	2242	0.119	6.21118
Leptodactylus mystacinus	LGE-B 013	Rosario, Santa Fe, Argentina.	0.042	2281	0.115	6.36943
Leptodactylus mystacinus	LGE-B 013	Rosario, Santa Fe, Argentina.	0.037	2281	0.116	6.53595
Leptodactylus mystacinus	LGE-B 014	Rosario, Santa Fe, Argentina.	0.049	2281	0.161	4.7619
Leptodactylus mystacinus	LGE-B 014	Rosario, Santa Fe, Argentina.	0.055	2261	0.185	4.16667
Leptodactylus mystacinus	LGE-B 014	Rosario, Santa Fe, Argentina.	0.053	2300	0.174	4.40529
Leptodactylus mystacinus	LGE-B 014	Rosario, Santa Fe, Argentina.	0.052	2281	0.176	4.38596
Leptodactylus mystacinus	LGE-B 014	Rosario, Santa Fe, Argentina.	0.054	2281	0.183	4.21941
Leptodactylus mystacinus	LGE-B 014	Rosario, Santa Fe, Argentina.	0.056	2300	0.165	4.52489
Leptodactylus mystacinus	LGE-B 014	Rosario, Santa Fe, Argentina.	0.05	2261	0.17	4.54545
Leptodactylus mystacinus	LGE-B 014	Rosario, Santa Fe, Argentina.	0.051	2281	0.177	4.38596
Leptodactylus mystacinus	LGE-B 014	Rosario, Santa Fe, Argentina.	0.053	2281	0.181	4.2735
Leptodactylus mystacinus	LGE-B 014	Rosario, Santa Fe, Argentina.	0.054	2261	0.187	4.14938
Leptodactylus mystacinus	LGE-B 014	Rosario, Santa Fe, Argentina.	0.051	2281	0.162	4.69484
Leptodactylus mystacinus	LGE-B 014	Rosario, Santa Fe, Argentina.	0.052	2281	0.169	4.52489
Leptodactylus mystacinus	LGE-B 014	Rosario, Santa Fe, Argentina.	0.053	2320	0.171	4.46429
Leptodactylus mystacinus	LGE-B 014	Rosario, Santa Fe, Argentina.	0.05	2281	0.167	4.60829
Leptodactylus mystacinus	LGE-B 014	Rosario, Santa Fe, Argentina.	0.056	2281	0.176	4.31034
Leptodactylus mystacinus	LGE-B 014	Rosario, Santa Fe, Argentina.	0.039	2281	0.108	6.80272
Leptodactylus mystacinus	LGE-B 014	Rosario, Santa Fe, Argentina.	0.038	2300	0.12	6.32911
Leptodactylus mystacinus	LGE-B 014	Rosario, Santa Fe, Argentina.	0.04	2300	0.117	6.36943
Leptodactylus mystacinus	LGE-B 014	Rosario, Santa Fe, Argentina.	0.044	2300	0.107	6.62252
Leptodactylus mystacinus	LGE-B 014	Rosario, Santa Fe, Argentina.	0.037	2281	0.117	6.49351
Leptodactylus mystacinus	LGE-B 014	Rosario, Santa Fe, Argentina.	0.036	2281	0.117	6.53595
Leptodactylus mystacinus	LGE-B 014	Rosario, Santa Fe, Argentina.	0.035	2300	0.121	6.41026
Leptodactylus mystacinus	LGE-B 014	Rosario, Santa Fe, Argentina.	0.037	2267	0.115	6.57895
Leptodactylus mystacinus	LGE-B 014	Rosario, Santa Fe, Argentina.	0.038	2281	0.114	6.57895
Leptodactylus mystacinus	LGE-B 014	Rosario, Santa Fe, Argentina.	0.042	2261	0.109	6.62252
Leptodactylus mystacinus	LGE-B 014	Rosario, Santa Fe, Argentina.	0.035	2281	0.117	6.57895
Leptodactylus mystacinus	LGE-B 014	Rosario, Santa Fe, Argentina.	0.038	2300	0.118	6.41026
Leptodactylus mystacinus	LGE-B 014	Rosario, Santa Fe, Argentina.	0.039	2300	0.117	6.41026
Leptodactylus mystacinus	LGE-B 014	Rosario, Santa Fe, Argentina.	0.04	2261	0.114	6.49351
Leptodactylus mystacinus	LGE-B 014	Rosario, Santa Fe, Argentina.	0.039	2261	0.114	6.53595
Leptodactylus mystacinus	LGE-B 015	Santiago Vazquez, Montevideo, Uruguay.	0.054	2322	0.113	5.98802
Leptodactylus mystacinus	LGE-B 015	Santiago Vazquez, Montevideo, Uruguay.	0.056	2322	0.122	5.61798
Leptodactylus mystacinus	LGE-B 015	Santiago Vazquez, Montevideo, Uruguay.	0.055	2322	0.11	6.06061
Leptodactylus mystacinus	LGE-B 015	Santiago Vazquez, Montevideo, Uruguay.	0.046	2366	0.122	5.95238
Leptodactylus mystacinus	LGE-B 015	Santiago Vazquez, Montevideo, Uruguay.	0.046	2366	0.123	5.91716
Leptodactylus mystacinus	LGE-B 015	Santiago Vazquez, Montevideo, Uruguay.	0.046	2366	0.128	5.74713
Leptodactylus mystacinus	LGE-B 015	Santiago Vazquez, Montevideo, Uruguay.	0.051	2366	0.113	6.09756
Leptodactylus mystacinus	LGE-B 015	Santiago Vazquez, Montevideo, Uruguay.	0.053	2388	0.11	6.13497
Leptodactylus mystacinus	LGE-B 015	Santiago Vazquez, Montevideo, Uruguay.	0.052	2388	0.121	5.78035
Leptodactylus mystacinus	LGE-B 015	Santiago Vazquez, Montevideo, Uruguay.	0.054	2388	0.127	5.52486
Leptodactylus mystacinus	LGE-B 015	Santiago Vazquez, Montevideo, Uruguay.	0.046	2388	0.129	5.71429
Leptodactylus mystacinus	LGE-B 015	Santiago Vazquez, Montevideo, Uruguay.	0.043	2410	0.123	6.0241
Leptodactylus mystacinus	LGE-B 015	Santiago Vazquez, Montevideo, Uruguay.	0.044	2410	0.127	5.84795
Leptodactylus mystacinus	LGE-B 015	Santiago Vazquez, Montevideo, Uruguay.	0.045	2410	0.136	5.52486
Leptodactylus mystacinus	LGE-B 015	Santiago Vazquez, Montevideo, Uruguay.	0.051	2410	0.132	5.46448
Leptodactylus mystacinus	LGE-B 015	Santiago Vazquez, Montevideo, Uruguay.	0.044	2410	0.129	5.78035
Leptodactylus mystacinus	LGE-B 015	Santiago Vazquez, Montevideo, Uruguay.	0.044	2410	0.131	5.71429
Leptodactylus mystacinus	LGE-B 015	Santiago Vazquez, Montevideo, Uruguay.	0.049	2410	0.115	6.09756
Leptodactylus mystacinus	LGE-B 015	Santiago Vazquez, Montevideo, Uruguay.	0.046	2410	0.123	5.91716
Leptodactylus mystacinus	LGE-B 015	Santiago Vazquez, Montevideo, Uruguay.	0.048	2410	0.121	5.91716
Leptodactylus mystacinus	LGE-B 015	Santiago Vazquez, Montevideo, Uruguay.	0.047	2410	0.122	5.91716
Leptodactylus mystacinus	LGE-B 015	Santiago Vazquez, Montevideo, Uruguay.	0.044	2410	0.123	5.98802
Leptodactylus mystacinus	LGE-B 015	Santiago Vazquez, Montevideo, Uruguay.	0.045	2410	0.117	6.17284
Leptodactylus mystacinus	LGE-B 015	Santiago Vazquez, Montevideo, Uruguay.	0.05	2410	0.123	5.78035
Leptodactylus mystacinus	LGE-B 015	Santiago Vazquez, Montevideo, Uruguay.	0.049	2432	0.127	5.68182
Leptodactylus mystacinus	LGE-B 015	Santiago Vazquez, Montevideo, Uruguay.	0.045	2432	0.124	5.91716
Leptodactylus mystacinus	LGE-B 015	Santiago Vazquez, Montevideo, Uruguay.	0.047	2432	0.124	5.84795
Leptodactylus mystacinus	LGE-B 015	Santiago Vazquez, Montevideo, Uruguay.	0.048	2432	0.121	5.91716
Leptodactylus mystacinus	LGE-B 015	Santiago Vazquez, Montevideo, Uruguay.	0.047	2432	0.122	5.91716
Leptodactylus mystacinus	LGE-B 015	Santiago Vazquez, Montevideo, Uruguay.	0.048	2432	0.118	6.0241
Leptodactylus mystacinus	LGE-B 015	Santiago Vazquez, Montevideo, Uruguay.	0.042	2455	0.125	5.98802
Leptodactylus mystacinus	LGE-B 016	Ramallo, Buenos Aires, Argentina.	0.044	2300	0.107	6.62252
Leptodactylus mystacinus	LGE-B 016	Ramallo, Buenos Aires, Argentina.	0.039	2281	0.108	6.80272
Leptodactylus mystacinus	LGE-B 016	Ramallo, Buenos Aires, Argentina.	0.042	2261	0.109	6.62252
Leptodactylus mystacinus	LGE-B 016	Ramallo, Buenos Aires, Argentina.	0.04	2281	0.111	6.62252
Leptodactylus mystacinus	LGE-B 016	Ramallo, Buenos Aires, Argentina.	0.041	2242	0.113	6.49351
Leptodactylus mystacinus	LGE-B 016	Ramallo, Buenos Aires, Argentina.	0.038	2281	0.114	6.57895
Leptodactylus mystacinus	LGE-B 016	Ramallo, Buenos Aires, Argentina.	0.04	2261	0.114	6.49351
Leptodactylus mystacinus	LGE-B 016	Ramallo, Buenos Aires, Argentina.	0.039	2261	0.114	6.53595
Leptodactylus mystacinus	LGE-B 016	Ramallo, Buenos Aires, Argentina.	0.037	2281	0.114	6.62252
Leptodactylus mystacinus	LGE-B 016	Ramallo, Buenos Aires, Argentina.	0.04	2261	0.114	6.49351
Leptodactylus mystacinus	LGE-B 016	Ramallo, Buenos Aires, Argentina.	0.037	2267	0.115	6.57895
Leptodactylus mystacinus	LGE-B 016	Ramallo, Buenos Aires, Argentina.	0.036	2300	0.115	6.62252
Leptodactylus mystacinus	LGE-B 016	Ramallo, Buenos Aires, Argentina.	0.037	2281	0.115	6.57895
Leptodactylus mystacinus	LGE-B 016	Ramallo, Buenos Aires, Argentina.	0.042	2281	0.115	6.36943
Leptodactylus mystacinus	LGE-B 016	Ramallo, Buenos Aires, Argentina.	0.037	2281	0.116	6.53595
Leptodactylus mystacinus	LGE-B 016	Ramallo, Buenos Aires, Argentina.	0.04	2300	0.117	6.36943
Leptodactylus mystacinus	LGE-B 016	Ramallo, Buenos Aires, Argentina.	0.037	2281	0.117	6.49351
Leptodactylus mystacinus	LGE-B 016	Ramallo, Buenos Aires, Argentina.	0.036	2281	0.117	6.53595
Leptodactylus mystacinus	LGE-B 016	Ramallo, Buenos Aires, Argentina.	0.035	2281	0.117	6.57895
Leptodactylus mystacinus	LGE-B 016	Ramallo, Buenos Aires, Argentina.	0.039	2300	0.117	6.41026
Leptodactylus mystacinus	LGE-B 016	Ramallo, Buenos Aires, Argentina.	0.036	2222	0.117	6.53595
Leptodactylus mystacinus	LGE-B 016	Ramallo, Buenos Aires, Argentina.	0.038	2300	0.118	6.41026
Leptodactylus mystacinus	LGE-B 016	Ramallo, Buenos Aires, Argentina.	0.035	2261	0.118	6.53595
Leptodactylus mystacinus	LGE-B 016	Ramallo, Buenos Aires, Argentina.	0.038	2242	0.118	6.41026
Leptodactylus mystacinus	LGE-B 016	Ramallo, Buenos Aires, Argentina.	0.035	2281	0.118	6.53595
Leptodactylus mystacinus	LGE-B 016	Ramallo, Buenos Aires, Argentina.	0.042	2242	0.119	6.21118
Leptodactylus mystacinus	LGE-B 016	Ramallo, Buenos Aires, Argentina.	0.038	2300	0.12	6.32911
Leptodactylus mystacinus	LGE-B 016	Ramallo, Buenos Aires, Argentina.	0.039	2222	0.12	6.28931
Leptodactylus mystacinus	LGE-B 016	Ramallo, Buenos Aires, Argentina.	0.035	2300	0.121	6.41026
Leptodactylus mystacinus	LGE-B 016	Ramallo, Buenos Aires, Argentina.	0.037	2281	0.127	6.09756
Leptodactylus mystacinus	LGE-B 017	Ramallo, Buenos Aires, Argentina.	0.031	2261	0.131	6.17284
Leptodactylus mystacinus	LGE-B 017	Ramallo, Buenos Aires, Argentina.	0.031	2192	0.133	6.09756
Leptodactylus mystacinus	LGE-B 017	Ramallo, Buenos Aires, Argentina.	0.03	2300	0.133	6.13497
Leptodactylus mystacinus	LGE-B 017	Ramallo, Buenos Aires, Argentina.	0.031	2261	0.133	6.09756
Leptodactylus mystacinus	LGE-B 017	Ramallo, Buenos Aires, Argentina.	0.033	2261	0.133	6.0241
Leptodactylus mystacinus	LGE-B 017	Ramallo, Buenos Aires, Argentina.	0.03	2300	0.135	6.06061
Leptodactylus mystacinus	LGE-B 017	Ramallo, Buenos Aires, Argentina.	0.033	2281	0.135	5.95238
Leptodactylus mystacinus	LGE-B 017	Ramallo, Buenos Aires, Argentina.	0.032	2261	0.136	5.95238
Leptodactylus mystacinus	LGE-B 017	Ramallo, Buenos Aires, Argentina.	0.036	2281	0.136	5.81395
Leptodactylus mystacinus	LGE-B 017	Ramallo, Buenos Aires, Argentina.	0.031	2245	0.137	5.95238
Leptodactylus mystacinus	LGE-B 017	Ramallo, Buenos Aires, Argentina.	0.032	2214	0.137	5.91716
Leptodactylus mystacinus	LGE-B 017	Ramallo, Buenos Aires, Argentina.	0.037	2242	0.137	5.74713
Leptodactylus mystacinus	LGE-B 017	Ramallo, Buenos Aires, Argentina.	0.031	2261	0.137	5.95238
Leptodactylus mystacinus	LGE-B 017	Ramallo, Buenos Aires, Argentina.	0.031	2300	0.137	5.95238
Leptodactylus mystacinus	LGE-B 017	Ramallo, Buenos Aires, Argentina.	0.031	2261	0.137	5.95238
Leptodactylus mystacinus	LGE-B 017	Ramallo, Buenos Aires, Argentina.	0.032	2528	0.138	5.88235
Leptodactylus mystacinus	LGE-B 017	Ramallo, Buenos Aires, Argentina.	0.031	2259	0.14	5.84795
Leptodactylus mystacinus	LGE-B 017	Ramallo, Buenos Aires, Argentina.	0.03	2572	0.14	5.88235
Leptodactylus mystacinus	LGE-B 017	Ramallo, Buenos Aires, Argentina.	0.032	2550	0.14	5.81395
Leptodactylus mystacinus	LGE-B 017	Ramallo, Buenos Aires, Argentina.	0.034	2300	0.141	5.71429
Leptodactylus mystacinus	LGE-B 017	Ramallo, Buenos Aires, Argentina.	0.034	2281	0.142	5.68182
Leptodactylus mystacinus	LGE-B 017	Ramallo, Buenos Aires, Argentina.	0.033	2281	0.142	5.71429
Leptodactylus mystacinus	LGE-B 017	Ramallo, Buenos Aires, Argentina.	0.034	2242	0.143	5.64972
Leptodactylus mystacinus	LGE-B 017	Ramallo, Buenos Aires, Argentina.	0.034	2281	0.145	5.58659
Leptodactylus mystacinus	LGE-B 017	Ramallo, Buenos Aires, Argentina.	0.035	2281	0.146	5.52486
Leptodactylus mystacinus	LGE-B 017	Ramallo, Buenos Aires, Argentina.	0.036	2281	0.146	5.49451
Leptodactylus mystacinus	LGE-B 017	Ramallo, Buenos Aires, Argentina.	0.032	2281	0.146	5.61798
Leptodactylus mystacinus	LGE-B 017	Ramallo, Buenos Aires, Argentina.	0.031	2507	0.146	5.64972
Leptodactylus mystacinus	LGE-B 017	Ramallo, Buenos Aires, Argentina.	0.032	2300	0.148	5.55556
Leptodactylus mystacinus	LGE-B 017	Ramallo, Buenos Aires, Argentina.	0.031	2261	0.15	5.52486
Leptodactylus mystacinus	LGE-B 018	Ramallo, Buenos Aires, Argentina.	0.034	2261	0.151	5.40541
Leptodactylus mystacinus	LGE-B 018	Ramallo, Buenos Aires, Argentina.	0.031	2261	0.16	5.2356
Leptodactylus mystacinus	LGE-B 018	Ramallo, Buenos Aires, Argentina.	0.049	2281	0.161	4.7619
Leptodactylus mystacinus	LGE-B 018	Ramallo, Buenos Aires, Argentina.	0.054	2261	0.161	4.65116
Leptodactylus mystacinus	LGE-B 018	Ramallo, Buenos Aires, Argentina.	0.034	2242	0.161	5.12821
Leptodactylus mystacinus	LGE-B 018	Ramallo, Buenos Aires, Argentina.	0.051	2281	0.162	4.69484
Leptodactylus mystacinus	LGE-B 018	Ramallo, Buenos Aires, Argentina.	0.056	2300	0.165	4.52489
Leptodactylus mystacinus	LGE-B 018	Ramallo, Buenos Aires, Argentina.	0.054	2261	0.166	4.54545
Leptodactylus mystacinus	LGE-B 018	Ramallo, Buenos Aires, Argentina.	0.032	2261	0.166	5.05051
Leptodactylus mystacinus	LGE-B 018	Ramallo, Buenos Aires, Argentina.	0.05	2281	0.167	4.60829
Leptodactylus mystacinus	LGE-B 018	Ramallo, Buenos Aires, Argentina.	0.052	2281	0.169	4.52489
Leptodactylus mystacinus	LGE-B 018	Ramallo, Buenos Aires, Argentina.	0.05	2261	0.17	4.54545
Leptodactylus mystacinus	LGE-B 018	Ramallo, Buenos Aires, Argentina.	0.053	2320	0.171	4.46429
Leptodactylus mystacinus	LGE-B 018	Ramallo, Buenos Aires, Argentina.	0.056	2281	0.171	4.40529
Leptodactylus mystacinus	LGE-B 018	Ramallo, Buenos Aires, Argentina.	0.054	2261	0.171	4.44444
Leptodactylus mystacinus	LGE-B 018	Ramallo, Buenos Aires, Argentina.	0.058	2300	0.171	4.36681
Leptodactylus mystacinus	LGE-B 018	Ramallo, Buenos Aires, Argentina.	0.051	2281	0.171	4.5045
Leptodactylus mystacinus	LGE-B 018	Ramallo, Buenos Aires, Argentina.	0.058	2300	0.172	4.34783
Leptodactylus mystacinus	LGE-B 018	Ramallo, Buenos Aires, Argentina.	0.053	2300	0.174	4.40529
Leptodactylus mystacinus	LGE-B 018	Ramallo, Buenos Aires, Argentina.	0.057	2281	0.175	4.31034
Leptodactylus mystacinus	LGE-B 018	Ramallo, Buenos Aires, Argentina.	0.052	2281	0.176	4.38596
Leptodactylus mystacinus	LGE-B 018	Ramallo, Buenos Aires, Argentina.	0.056	2281	0.176	4.31034
Leptodactylus mystacinus	LGE-B 018	Ramallo, Buenos Aires, Argentina.	0.057	2281	0.176	4.29185
Leptodactylus mystacinus	LGE-B 018	Ramallo, Buenos Aires, Argentina.	0.051	2281	0.177	4.38596
Leptodactylus mystacinus	LGE-B 018	Ramallo, Buenos Aires, Argentina.	0.055	2281	0.179	4.2735
Leptodactylus mystacinus	LGE-B 018	Ramallo, Buenos Aires, Argentina.	0.055	2242	0.18	4.25532
Leptodactylus mystacinus	LGE-B 018	Ramallo, Buenos Aires, Argentina.	0.053	2281	0.181	4.2735
Leptodactylus mystacinus	LGE-B 018	Ramallo, Buenos Aires, Argentina.	0.054	2261	0.181	4.25532
Leptodactylus mystacinus	LGE-B 018	Ramallo, Buenos Aires, Argentina.	0.058	2281	0.181	4.1841
Leptodactylus mystacinus	LGE-B 018	Ramallo, Buenos Aires, Argentina.	0.054	2281	0.183	4.21941
Leptodactylus mystacinus	STE-007	Entre Ríos, Argentina	0.04	2795	0.096	7.35294
Leptodactylus mystacinus	STE-007	Entre Ríos, Argentina	0.033	2795	0.093	7.93651
Leptodactylus mystacinus	STE-007	Entre Ríos, Argentina	0.04	2795	0.096	7.35294
Leptodactylus mystacinus	STE-007	Entre Ríos, Argentina	0.03	2821	0.093	8.13008
Leptodactylus mystacinus	STE-007	Entre Ríos, Argentina	0.033	2821	0.097	7.69231
Leptodactylus mystacinus	STE-007	Entre Ríos, Argentina	0.033	2821	0.094	7.87402
Leptodactylus mystacinus	STE-007	Entre Ríos, Argentina	0.033	2821	0.091	8.06452
Leptodactylus mystacinus	STE-007	Entre Ríos, Argentina	0.035	2821	0.093	7.8125
Leptodactylus mystacinus	STE-007	Entre Ríos, Argentina	0.038	2821	0.084	8.19672
Leptodactylus mystacinus	STE-007	Entre Ríos, Argentina	0.031	2821	0.088	8.40336
Leptodactylus mystacinus	STE-007	Entre Ríos, Argentina	0.033	2821	0.102	7.40741
Leptodactylus mystacinus	STE-007	Entre Ríos, Argentina	0.033	2821	0.092	8
Leptodactylus mystacinus	STE-007	Entre Ríos, Argentina	0.031	2821	0.091	8.19672
Leptodactylus mystacinus	STE-007	Entre Ríos, Argentina	0.036	2821	0.088	8.06452
Leptodactylus mystacinus	STE-007	Entre Ríos, Argentina	0.032	2821	0.095	7.87402
Leptodactylus mystacinus	STE-007	Entre Ríos, Argentina	0.031	2821	0.098	7.75194
Leptodactylus mystacinus	STE-007	Entre Ríos, Argentina	0.028	2821	0.102	7.69231
Leptodactylus mystacinus	STE-007	Entre Ríos, Argentina	0.031	2821	0.107	7.24638
Leptodactylus mystacinus	STE-007	Entre Ríos, Argentina	0.035	2821	0.106	7.0922
Leptodactylus mystacinus	STE-007	Entre Ríos, Argentina	0.029	2821	0.09	8.40336
Leptodactylus mystacinus	STE-007	Entre Ríos, Argentina	0.036	2821	0.088	8.06452
Leptodactylus mystacinus	STE-007	Entre Ríos, Argentina	0.032	2821	0.095	7.87402
Leptodactylus mystacinus	STE-007	Entre Ríos, Argentina	0.031	2821	0.098	7.75194
Leptodactylus mystacinus	STE-007	Entre Ríos, Argentina	0.028	2821	0.102	7.69231
Leptodactylus mystacinus	STE-007	Entre Ríos, Argentina	0.031	2821	0.107	7.24638
Leptodactylus mystacinus	STE-007	Entre Ríos, Argentina	0.035	2821	0.106	7.0922
Leptodactylus mystacinus	STE-007	Entre Ríos, Argentina	0.031	2847	0.092	8.13008
Leptodactylus mystacinus	STE-007	Entre Ríos, Argentina	0.035	2847	0.088	8.13008
Leptodactylus mystacinus	STE-007	Entre Ríos, Argentina	0.031	2847	0.096	7.87402
Leptodactylus mystacinus	STE-007	Entre Ríos, Argentina	0.031	2874	0.093	8.06452
Leptodactylus mystacinus	STE-013	Entre Ríos, Argentina	0.034	2874	0.088	8.19672
Leptodactylus mystacinus	STE-013	Entre Ríos, Argentina	0.031	2874	0.1	7.63359
Leptodactylus mystacinus	STE-013	Entre Ríos, Argentina	0.031	2874	0.098	7.75194
Leptodactylus mystacinus	STE-013	Entre Ríos, Argentina	0.033	2874	0.093	7.93651
Leptodactylus mystacinus	STE-013	Entre Ríos, Argentina	0.034	2874	0.088	8.19672
Leptodactylus mystacinus	STE-013	Entre Ríos, Argentina	0.031	2874	0.1	7.63359
Leptodactylus mystacinus	STE-013	Entre Ríos, Argentina	0.04	2644	0.088	7.8125
Leptodactylus mystacinus	STE-013	Entre Ríos, Argentina	0.038	2668	0.098	7.35294
Leptodactylus mystacinus	STE-013	Entre Ríos, Argentina	0.037	2693	0.089	7.93651
Leptodactylus mystacinus	STE-013	Entre Ríos, Argentina	0.037	2693	0.1	7.29927
Leptodactylus mystacinus	STE-013	Entre Ríos, Argentina	0.038	2718	0.087	8
Leptodactylus mystacinus	STE-013	Entre Ríos, Argentina	0.038	2718	0.104	7.04225
Leptodactylus mystacinus	STE-013	Entre Ríos, Argentina	0.033	2744	0.094	7.87402
Leptodactylus mystacinus	STE-013	Entre Ríos, Argentina	0.035	2744	0.089	8.06452
Leptodactylus mystacinus	STE-013	Entre Ríos, Argentina	0.031	2744	0.092	8.13008
Leptodactylus mystacinus	STE-013	Entre Ríos, Argentina	0.032	2744	0.089	8.26446
Leptodactylus mystacinus	STE-013	Entre Ríos, Argentina	0.037	2744	0.091	7.8125
Leptodactylus mystacinus	STE-013	Entre Ríos, Argentina	0.032	2744	0.089	8.26446
Leptodactylus mystacinus	STE-013	Entre Ríos, Argentina	0.031	2766	0.093	8.06452
Leptodactylus mystacinus	STE-013	Entre Ríos, Argentina	0.047	2766	0.09	7.29927
Leptodactylus mystacinus	STE-013	Entre Ríos, Argentina	0.033	2769	0.094	7.87402
Leptodactylus mystacinus	STE-013	Entre Ríos, Argentina	0.04	2785	0.085	8
Leptodactylus mystacinus	STE-013	Entre Ríos, Argentina	0.032	2791	0.087	8.40336
Leptodactylus mystacinus	STE-013	Entre Ríos, Argentina	0.033	2795	0.094	7.87402
Leptodactylus mystacinus	STE-013	Entre Ríos, Argentina	0.037	2795	0.09	7.87402
Leptodactylus mystacinus	STE-013	Entre Ríos, Argentina	0.033	2795	0.09	8.13008
Leptodactylus mystacinus	STE-013	Entre Ríos, Argentina	0.034	2795	0.089	8.13008
Leptodactylus mystacinus	STE-013	Entre Ríos, Argentina	0.036	2795	0.088	8.06452
Leptodactylus mystacinus	STE-013	Entre Ríos, Argentina	0.035	2795	0.085	8.33333
Leptodactylus mystacinus	STE-013	Entre Ríos, Argentina	0.035	2795	0.088	8.13008
Leptodactylus mystacinus	FNVJ_13087	Pozo Verde, Córdoba, Argentina.	0.037	2012	0.14	5.64972
Leptodactylus mystacinus	FNVJ_13087	Pozo Verde, Córdoba, Argentina.	0.038	1995	0.156	5.15464
Leptodactylus mystacinus	FNVJ_13087	Pozo Verde, Córdoba, Argentina.	0.039	2012	0.143	5.49451
Leptodactylus mystacinus	FNVJ_13087	Pozo Verde, Córdoba, Argentina.	0.039	2012	0.153	5.20833
Leptodactylus mystacinus	FNVJ_13087	Pozo Verde, Córdoba, Argentina.	0.041	2012	0.124	6.06061
Leptodactylus mystacinus	FNVJ_13087	Pozo Verde, Córdoba, Argentina.	0.04	2012	0.127	5.98802
Leptodactylus mystacinus	FNVJ_13087	Pozo Verde, Córdoba, Argentina.	0.041	1995	0.126	5.98802
Leptodactylus mystacinus	FNVJ_13087	Pozo Verde, Córdoba, Argentina.	0.042	1995	0.129	5.84795
Leptodactylus mystacinus	FNVJ_13087	Pozo Verde, Córdoba, Argentina.	0.044	1978	0.127	5.84795
Leptodactylus mystacinus	FNVJ_13087	Pozo Verde, Córdoba, Argentina.	0.045	1960	0.128	5.78035
Leptodactylus mystacinus	FNVJ_13087	Pozo Verde, Córdoba, Argentina.	0.041	1995	0.125	6.0241
Leptodactylus mystacinus	FNVJ_13087	Pozo Verde, Córdoba, Argentina.	0.043	2012	0.136	5.58659
Leptodactylus mystacinus	FNVJ_13087	Pozo Verde, Córdoba, Argentina.	0.04	2012	0.121	6.21118
Leptodactylus mystacinus	FNVJ_13087	Pozo Verde, Córdoba, Argentina.	0.042	2012	0.144	5.37634
Leptodactylus mystacinus	FNVJ_13087	Pozo Verde, Córdoba, Argentina.	0.043	2012	0.125	5.95238
Leptodactylus mystacinus	FNVJ_13087	Pozo Verde, Córdoba, Argentina.	0.039	2012	0.128	5.98802
Leptodactylus mystacinus	FNVJ_13087	Pozo Verde, Córdoba, Argentina.	0.042	1992	0.128	5.88235
Leptodactylus mystacinus	FNVJ_13087	Pozo Verde, Córdoba, Argentina.	0.04	1978	0.124	6.09756
Leptodactylus mystacinus	FNVJ_13087	Pozo Verde, Córdoba, Argentina.	0.042	1978	0.151	5.18135
Leptodactylus mystacinus	FNVJ_13087	Pozo Verde, Córdoba, Argentina.	0.041	2012	0.148	5.29101
Leptodactylus mystacinus	FNVJ_13087	Pozo Verde, Córdoba, Argentina.	0.041	1978	0.132	5.78035
Leptodactylus mystacinus	FNVJ_13087	Pozo Verde, Córdoba, Argentina.	0.039	2012	0.121	6.25
Leptodactylus mystacinus	FNVJ_13087	Pozo Verde, Córdoba, Argentina.	0.04	2030	0.154	5.15464
Leptodactylus mystacinus	FNVJ_13087	Pozo Verde, Córdoba, Argentina.	0.04	1960	0.154	5.15464
Leptodactylus mystacinus	FNVJ_13087	Pozo Verde, Córdoba, Argentina.	0.041	1965	0.141	5.49451
Leptodactylus mystacinus	FNVJ_13087	Pozo Verde, Córdoba, Argentina.	0.039	1978	0.147	5.37634
Leptodactylus mystacinus	FNVJ_13087	Pozo Verde, Córdoba, Argentina.	0.04	1978	0.137	5.64972
Leptodactylus mystacinus	FNVJ_13087	Pozo Verde, Córdoba, Argentina.	0.045	1978	0.154	5.02513
Leptodactylus mystacinus	FNVJ_13087	Pozo Verde, Córdoba, Argentina.	0.042	2012	0.127	5.91716
Leptodactylus mystacinus	FNVJ_13087	Pozo Verde, Córdoba, Argentina.	0.042	1978	0.143	5.40541
Leptodactylus mystacinus	FNVJ_13087	Pozo Verde, Córdoba, Argentina.	0.042	2012	0.131	5.78035
Leptodactylus mystacinus	FNVJ_13087	Pozo Verde, Córdoba, Argentina.	0.041	1960	0.132	5.78035
Leptodactylus mystacinus	FNVJ_13087	Pozo Verde, Córdoba, Argentina.	0.04	2012	0.127	5.98802
Leptodactylus mystacinus	FNVJ_13087	Pozo Verde, Córdoba, Argentina.	0.039	2012	0.147	5.37634
Leptodactylus mystacinus	FNVJ_13087	Pozo Verde, Córdoba, Argentina.	0.037	2012	0.14	5.64972
Leptodactylus mystacinus	FNVJ_13087	Pozo Verde, Córdoba, Argentina.	0.041	1995	0.162	4.92611
Leptodactylus mystacinus	FNVJ_13087	Pozo Verde, Córdoba, Argentina.	0.04	1978	0.156	5.10204
Leptodactylus mystacinus	FNVJ_13087	Pozo Verde, Córdoba, Argentina.	0.04	2012	0.126	6.0241
Leptodactylus mystacinus	FNVJ_13087	Pozo Verde, Córdoba, Argentina.	0.042	1978	0.129	5.84795
Leptodactylus mystacinus	FNVJ_13087	Pozo Verde, Córdoba, Argentina.	0.041	1995	0.126	5.98802
Leptodactylus mystacinus	FNVJ_13087	Pozo Verde, Córdoba, Argentina.	0.039	1978	0.134	5.78035
Leptodactylus mystacinus	FNVJ_13087	Pozo Verde, Córdoba, Argentina.	0.037	1995	0.133	5.88235
Leptodactylus mystacinus	FNVJ_13087	Pozo Verde, Córdoba, Argentina.	0.037	1995	0.132	5.91716
Leptodactylus mystacinus	FNVJ_13087	Pozo Verde, Córdoba, Argentina.	0.036	1995	0.15	5.37634
Leptodactylus mystacinus	FNVJ_13087	Pozo Verde, Córdoba, Argentina.	0.041	1978	0.129	5.88235
Leptodactylus mystacinus	FNVJ_13087	Pozo Verde, Córdoba, Argentina.	0.038	2012	0.129	5.98802
Leptodactylus mystacinus	FNVJ_13087	Pozo Verde, Córdoba, Argentina.	0.038	2012	0.134	5.81395
Leptodactylus mystacinus	FNVJ_13087	Pozo Verde, Córdoba, Argentina.	0.037	2012	0.145	5.49451
Leptodactylus mystacinus	FNVJ_13087	Pozo Verde, Córdoba, Argentina.	0.044	2012	0.13	5.74713
Leptodactylus mystacinus	FNVJ_13087	Pozo Verde, Córdoba, Argentina.	0.041	2012	0.139	5.55556
Leptodactylus mystacinus	FNVJ_31047	Campinas, São Paulo, Brazil.	0.039	2442	0.121	6.25
Leptodactylus mystacinus	FNVJ_31047	Campinas, São Paulo, Brazil.	0.044	2410	0.108	6.57895
Leptodactylus mystacinus	FNVJ_31047	Campinas, São Paulo, Brazil.	0.046	2410	0.102	6.75676
Leptodactylus mystacinus	FNVJ_31047	Campinas, São Paulo, Brazil.	0.043	2410	0.099	7.04225
Leptodactylus mystacinus	FNVJ_31047	Campinas, São Paulo, Brazil.	0.057	2410	0.101	6.32911
Leptodactylus mystacinus	FNVJ_31047	Campinas, São Paulo, Brazil.	0.063	2410	0.088	6.62252
Leptodactylus mystacinus	FNVJ_31047	Campinas, São Paulo, Brazil.	0.06	2455	0.094	6.49351
Leptodactylus mystacinus	FNVJ_31047	Campinas, São Paulo, Brazil.	0.06	2455	0.115	5.71429
Leptodactylus mystacinus	FNVJ_31047	Campinas, São Paulo, Brazil.	0.059	2432	0.091	6.66667
Leptodactylus mystacinus	FNVJ_31047	Campinas, São Paulo, Brazil.	0.06	2455	0.092	6.57895
Leptodactylus mystacinus	FNVJ_31047	Campinas, São Paulo, Brazil.	0.052	2432	0.095	6.80272
Leptodactylus mystacinus	FNVJ_31047	Campinas, São Paulo, Brazil.	0.042	2455	0.112	6.49351
Leptodactylus mystacinus	FNVJ_31047	Campinas, São Paulo, Brazil.	0.041	2432	0.125	6.0241
Leptodactylus mystacinus	FNVJ_31047	Campinas, São Paulo, Brazil.	0.043	2432	0.098	7.0922
Leptodactylus mystacinus	FNVJ_31047	Campinas, São Paulo, Brazil.	0.043	2455	0.105	6.75676
Leptodactylus mystacinus	FNVJ_31047	Campinas, São Paulo, Brazil.	0.04	2410	0.101	7.0922
Leptodactylus mystacinus	FNVJ_31047	Campinas, São Paulo, Brazil.	0.042	2455	0.1	7.04225
Leptodactylus mystacinus	FNVJ_31047	Campinas, São Paulo, Brazil.	0.044	2432	0.137	5.52486
Leptodactylus mystacinus	FNVJ_31047	Campinas, São Paulo, Brazil.	0.039	2432	0.149	5.31915
Leptodactylus mystacinus	FNVJ_31047	Campinas, São Paulo, Brazil.	0.042	2455	0.108	6.66667
Leptodactylus mystacinus	FNVJ_31047	Campinas, São Paulo, Brazil.	0.041	2388	0.1	7.0922
Leptodactylus mystacinus	FNVJ_31047	Campinas, São Paulo, Brazil.	0.041	2455	0.108	6.71141
Leptodactylus mystacinus	FNVJ_31047	Campinas, São Paulo, Brazil.	0.043	2432	0.111	6.49351
Leptodactylus mystacinus	FNVJ_31047	Campinas, São Paulo, Brazil.	0.041	2432	0.102	6.99301
Leptodactylus mystacinus	FNVJ_31047	Campinas, São Paulo, Brazil.	0.04	2455	0.094	7.46269
Leptodactylus mystacinus	FNVJ_31047	Campinas, São Paulo, Brazil.	0.057	2432	0.119	5.68182
Leptodactylus mystacinus	FNVJ_31047	Campinas, São Paulo, Brazil.	0.059	2455	0.118	5.64972
Leptodactylus mystacinus	FNVJ_31047	Campinas, São Paulo, Brazil.	0.061	2432	0.112	5.78035
Leptodactylus mystacinus	FNVJ_31047	Campinas, São Paulo, Brazil.	0.057	2432	0.116	5.78035
Leptodactylus mystacinus	FNVJ_31047	Campinas, São Paulo, Brazil.	0.042	2432	0.108	6.66667
Leptodactylus mystacinus	FNVJ_31047	Campinas, São Paulo, Brazil.	0.055	2388	0.1	6.45161
Leptodactylus mystacinus	FNVJ_31047	Campinas, São Paulo, Brazil.	0.055	2388	0.101	6.41026
Leptodactylus mystacinus	FNVJ_31047	Campinas, São Paulo, Brazil.	0.051	2410	0.085	7.35294
Leptodactylus mystacinus	FNVJ_31047	Campinas, São Paulo, Brazil.	0.056	2410	0.093	6.71141
Leptodactylus mystacinus	FNVJ_31047	Campinas, São Paulo, Brazil.	0.055	2388	0.093	6.75676
Leptodactylus mystacinus	FNVJ_31047	Campinas, São Paulo, Brazil.	0.055	2388	0.095	6.66667
Leptodactylus mystacinus	FNVJ_31047	Campinas, São Paulo, Brazil.	0.048	2388	0.096	6.94444
Leptodactylus mystacinus	FNVJ_31047	Campinas, São Paulo, Brazil.	0.055	2388	0.1	6.45161
Leptodactylus mystacinus	FNVJ_31047	Campinas, São Paulo, Brazil.	0.053	2344	0.095	6.75676
Leptodactylus mystacinus	FNVJ_31047	Campinas, São Paulo, Brazil.	0.055	2344	0.095	6.66667
Leptodactylus mystacinus	FNVJ_31047	Campinas, São Paulo, Brazil.	0.054	2344	0.105	6.28931
Leptodactylus mystacinus	FNVJ_31047	Campinas, São Paulo, Brazil.	0.051	2432	0.11	6.21118
Leptodactylus mystacinus	FNVJ_31047	Campinas, São Paulo, Brazil.	0.047	2388	0.107	6.49351
Leptodactylus mystacinus	FNVJ_31047	Campinas, São Paulo, Brazil.	0.056	2366	0.095	6.62252
Leptodactylus mystacinus	FNVJ_31047	Campinas, São Paulo, Brazil.	0.052	2366	0.096	6.75676
Leptodactylus mystacinus	FNVJ_31047	Campinas, São Paulo, Brazil.	0.066	2366	0.095	6.21118
Leptodactylus mystacinus	FNVJ_31047	Campinas, São Paulo, Brazil.	0.049	2366	0.107	6.41026
Leptodactylus mystacinus	FNVJ_31047	Campinas, São Paulo, Brazil.	0.053	2366	0.101	6.49351
Leptodactylus mystacinus	FNVJ_31047	Campinas, São Paulo, Brazil.	0.066	2366	0.085	6.62252
Leptodactylus mystacinus	FNVJ_31047	Campinas, São Paulo, Brazil.	0.063	2388	0.097	6.25
Leptodactylus mystacinus	FNVJ_31048	Campinas, São Paulo, Brazil.	0.046	2410	0.115	6.21118
Leptodactylus mystacinus	FNVJ_31048	Campinas, São Paulo, Brazil.	0.047	2432	0.115	6.17284
Leptodactylus mystacinus	FNVJ_31048	Campinas, São Paulo, Brazil.	0.047	2410	0.114	6.21118
Leptodactylus mystacinus	FNVJ_31048	Campinas, São Paulo, Brazil.	0.048	2410	0.117	6.06061
Leptodactylus mystacinus	FNVJ_31048	Campinas, São Paulo, Brazil.	0.045	2410	0.115	6.25
Leptodactylus mystacinus	FNVJ_31048	Campinas, São Paulo, Brazil.	0.047	2432	0.109	6.41026
Leptodactylus mystacinus	FNVJ_31048	Campinas, São Paulo, Brazil.	0.046	2410	0.116	6.17284
Leptodactylus mystacinus	FNVJ_31048	Campinas, São Paulo, Brazil.	0.048	2410	0.111	6.28931
Leptodactylus mystacinus	FNVJ_31048	Campinas, São Paulo, Brazil.	0.046	2410	0.118	6.09756
Leptodactylus mystacinus	FNVJ_31048	Campinas, São Paulo, Brazil.	0.045	2410	0.123	5.95238
Leptodactylus mystacinus	FNVJ_31048	Campinas, São Paulo, Brazil.	0.044	2432	0.121	6.06061
Leptodactylus mystacinus	FNVJ_31048	Campinas, São Paulo, Brazil.	0.046	2432	0.118	6.09756
Leptodactylus mystacinus	FNVJ_31048	Campinas, São Paulo, Brazil.	0.044	2410	0.119	6.13497
Leptodactylus mystacinus	FNVJ_31048	Campinas, São Paulo, Brazil.	0.046	2455	0.119	6.06061
Leptodactylus mystacinus	FNVJ_31048	Campinas, São Paulo, Brazil.	0.045	2388	0.119	6.09756
Leptodactylus mystacinus	FNVJ_31048	Campinas, São Paulo, Brazil.	0.046	2455	0.126	5.81395
Leptodactylus mystacinus	FNVJ_31048	Campinas, São Paulo, Brazil.	0.045	2410	0.129	5.74713
Leptodactylus mystacinus	FNVJ_31048	Campinas, São Paulo, Brazil.	0.044	2410	0.127	5.84795
Leptodactylus mystacinus	FNVJ_31048	Campinas, São Paulo, Brazil.	0.044	2410	0.122	6.0241
Leptodactylus mystacinus	FNVJ_31048	Campinas, São Paulo, Brazil.	0.043	2410	0.123	6.0241
Leptodactylus mystacinus	FNVJ_31048	Campinas, São Paulo, Brazil.	0.049	2432	0.127	5.68182
Leptodactylus mystacinus	FNVJ_31048	Campinas, São Paulo, Brazil.	0.042	2455	0.125	5.98802
Leptodactylus mystacinus	FNVJ_31048	Campinas, São Paulo, Brazil.	0.044	2410	0.127	5.84795
Leptodactylus mystacinus	FNVJ_31048	Campinas, São Paulo, Brazil.	0.045	2410	0.136	5.52486
Leptodactylus mystacinus	FNVJ_31048	Campinas, São Paulo, Brazil.	0.051	2410	0.132	5.46448
Leptodactylus mystacinus	FNVJ_31048	Campinas, São Paulo, Brazil.	0.045	2432	0.124	5.91716
Leptodactylus mystacinus	FNVJ_31048	Campinas, São Paulo, Brazil.	0.047	2432	0.124	5.84795
Leptodactylus mystacinus	FNVJ_31048	Campinas, São Paulo, Brazil.	0.044	2410	0.129	5.78035
Leptodactylus mystacinus	FNVJ_31048	Campinas, São Paulo, Brazil.	0.044	2410	0.131	5.71429
Leptodactylus mystacinus	FNVJ_31048	Campinas, São Paulo, Brazil.	0.049	2410	0.115	6.09756
Leptodactylus mystacinus	FNVJ_31048	Campinas, São Paulo, Brazil.	0.046	2410	0.123	5.91716
Leptodactylus mystacinus	FNVJ_31048	Campinas, São Paulo, Brazil.	0.048	2410	0.121	5.91716
Leptodactylus mystacinus	FNVJ_31048	Campinas, São Paulo, Brazil.	0.048	2432	0.121	5.91716
Leptodactylus mystacinus	FNVJ_31048	Campinas, São Paulo, Brazil.	0.047	2432	0.122	5.91716
Leptodactylus mystacinus	FNVJ_31048	Campinas, São Paulo, Brazil.	0.046	2366	0.122	5.95238
Leptodactylus mystacinus	FNVJ_31048	Campinas, São Paulo, Brazil.	0.048	2432	0.118	6.0241
Leptodactylus mystacinus	FNVJ_31048	Campinas, São Paulo, Brazil.	0.047	2410	0.122	5.91716
Leptodactylus mystacinus	FNVJ_31048	Campinas, São Paulo, Brazil.	0.046	2366	0.123	5.91716
Leptodactylus mystacinus	FNVJ_31048	Campinas, São Paulo, Brazil.	0.044	2410	0.123	5.98802
Leptodactylus mystacinus	FNVJ_31048	Campinas, São Paulo, Brazil.	0.045	2410	0.117	6.17284
Leptodactylus mystacinus	FNVJ_31048	Campinas, São Paulo, Brazil.	0.05	2410	0.123	5.78035
Leptodactylus mystacinus	FNVJ_31048	Campinas, São Paulo, Brazil.	0.046	2366	0.128	5.74713
Leptodactylus mystacinus	FNVJ_31048	Campinas, São Paulo, Brazil.	0.053	2388	0.11	6.13497
Leptodactylus mystacinus	FNVJ_31048	Campinas, São Paulo, Brazil.	0.054	2322	0.113	5.98802
Leptodactylus mystacinus	FNVJ_31048	Campinas, São Paulo, Brazil.	0.056	2322	0.122	5.61798
Leptodactylus mystacinus	FNVJ_31048	Campinas, São Paulo, Brazil.	0.055	2322	0.11	6.06061
Leptodactylus mystacinus	FNVJ_31048	Campinas, São Paulo, Brazil.	0.051	2366	0.113	6.09756
Leptodactylus mystacinus	FNVJ_31048	Campinas, São Paulo, Brazil.	0.052	2388	0.121	5.78035
Leptodactylus mystacinus	FNVJ_31048	Campinas, São Paulo, Brazil.	0.054	2388	0.127	5.52486
Leptodactylus mystacinus	FNVJ_31048	Campinas, São Paulo, Brazil.	0.046	2388	0.129	5.71429
Leptodactylus mystacinus	FNVJ_31049	Santiago Vazquez, Montevideo, Uruguay.	0.031	2847	0.092	8.13008
Leptodactylus mystacinus	FNVJ_31049	Santiago Vazquez, Montevideo, Uruguay.	0.03	2821	0.093	8.13008
Leptodactylus mystacinus	FNVJ_31049	Santiago Vazquez, Montevideo, Uruguay.	0.033	2795	0.094	7.87402
Leptodactylus mystacinus	FNVJ_31049	Santiago Vazquez, Montevideo, Uruguay.	0.033	2744	0.094	7.87402
Leptodactylus mystacinus	FNVJ_31049	Santiago Vazquez, Montevideo, Uruguay.	0.031	2874	0.093	8.06452
Leptodactylus mystacinus	FNVJ_31049	Santiago Vazquez, Montevideo, Uruguay.	0.033	2821	0.097	7.69231
Leptodactylus mystacinus	FNVJ_31049	Santiago Vazquez, Montevideo, Uruguay.	0.033	2821	0.094	7.87402
Leptodactylus mystacinus	FNVJ_31049	Santiago Vazquez, Montevideo, Uruguay.	0.033	2821	0.091	8.06452
Leptodactylus mystacinus	FNVJ_31049	Santiago Vazquez, Montevideo, Uruguay.	0.035	2821	0.093	7.8125
Leptodactylus mystacinus	FNVJ_31049	Santiago Vazquez, Montevideo, Uruguay.	0.038	2821	0.084	8.19672
Leptodactylus mystacinus	FNVJ_31049	Santiago Vazquez, Montevideo, Uruguay.	0.031	2821	0.088	8.40336
Leptodactylus mystacinus	FNVJ_31049	Santiago Vazquez, Montevideo, Uruguay.	0.032	2791	0.087	8.40336
Leptodactylus mystacinus	FNVJ_31049	Santiago Vazquez, Montevideo, Uruguay.	0.033	2769	0.094	7.87402
Leptodactylus mystacinus	FNVJ_31049	Santiago Vazquez, Montevideo, Uruguay.	0.035	2744	0.089	8.06452
Leptodactylus mystacinus	FNVJ_31049	Santiago Vazquez, Montevideo, Uruguay.	0.035	2847	0.088	8.13008
Leptodactylus mystacinus	FNVJ_31049	Santiago Vazquez, Montevideo, Uruguay.	0.031	2744	0.092	8.13008
Leptodactylus mystacinus	FNVJ_31049	Santiago Vazquez, Montevideo, Uruguay.	0.033	2821	0.102	7.40741
Leptodactylus mystacinus	FNVJ_31049	Santiago Vazquez, Montevideo, Uruguay.	0.033	2821	0.092	8
Leptodactylus mystacinus	FNVJ_31049	Santiago Vazquez, Montevideo, Uruguay.	0.031	2766	0.093	8.06452
Leptodactylus mystacinus	FNVJ_31049	Santiago Vazquez, Montevideo, Uruguay.	0.047	2766	0.09	7.29927
Leptodactylus mystacinus	FNVJ_31049	Santiago Vazquez, Montevideo, Uruguay.	0.031	2821	0.091	8.19672
Leptodactylus mystacinus	FNVJ_31049	Santiago Vazquez, Montevideo, Uruguay.	0.037	2795	0.09	7.87402
Leptodactylus mystacinus	FNVJ_31049	Santiago Vazquez, Montevideo, Uruguay.	0.033	2795	0.09	8.13008
Leptodactylus mystacinus	FNVJ_31049	Santiago Vazquez, Montevideo, Uruguay.	0.034	2795	0.089	8.13008
Leptodactylus mystacinus	FNVJ_31049	Santiago Vazquez, Montevideo, Uruguay.	0.036	2795	0.088	8.06452
Leptodactylus mystacinus	FNVJ_31049	Santiago Vazquez, Montevideo, Uruguay.	0.035	2795	0.085	8.33333
Leptodactylus mystacinus	FNVJ_31049	Santiago Vazquez, Montevideo, Uruguay.	0.035	2795	0.088	8.13008
Leptodactylus mystacinus	FNVJ_31049	Santiago Vazquez, Montevideo, Uruguay.	0.036	2821	0.088	8.06452
Leptodactylus mystacinus	FNVJ_31049	Santiago Vazquez, Montevideo, Uruguay.	0.032	2744	0.089	8.26446
Leptodactylus mystacinus	FNVJ_31049	Santiago Vazquez, Montevideo, Uruguay.	0.034	2874	0.088	8.19672
Leptodactylus mystacinus	FNVJ_31049	Santiago Vazquez, Montevideo, Uruguay.	0.04	2795	0.096	7.35294
Leptodactylus mystacinus	FNVJ_31049	Santiago Vazquez, Montevideo, Uruguay.	0.031	2874	0.1	7.63359
Leptodactylus mystacinus	FNVJ_31049	Santiago Vazquez, Montevideo, Uruguay.	0.031	2874	0.098	7.75194
Leptodactylus mystacinus	FNVJ_31049	Santiago Vazquez, Montevideo, Uruguay.	0.032	2821	0.095	7.87402
Leptodactylus mystacinus	FNVJ_31049	Santiago Vazquez, Montevideo, Uruguay.	0.031	2821	0.098	7.75194
Leptodactylus mystacinus	FNVJ_31049	Santiago Vazquez, Montevideo, Uruguay.	0.028	2821	0.102	7.69231
Leptodactylus mystacinus	FNVJ_31049	Santiago Vazquez, Montevideo, Uruguay.	0.031	2821	0.107	7.24638
Leptodactylus mystacinus	FNVJ_31049	Santiago Vazquez, Montevideo, Uruguay.	0.035	2821	0.106	7.0922
Leptodactylus mystacinus	FNVJ_31049	Santiago Vazquez, Montevideo, Uruguay.	0.033	2795	0.093	7.93651
Leptodactylus mystacinus	FNVJ_31049	Santiago Vazquez, Montevideo, Uruguay.	0.029	2821	0.09	8.40336
Leptodactylus mystacinus	FNVJ_31049	Santiago Vazquez, Montevideo, Uruguay.	0.033	2874	0.093	7.93651
Leptodactylus mystacinus	FNVJ_31049	Santiago Vazquez, Montevideo, Uruguay.	0.031	2847	0.096	7.87402
Leptodactylus mystacinus	FNVJ_31049	Santiago Vazquez, Montevideo, Uruguay.	0.04	2785	0.085	8
Leptodactylus mystacinus	FNVJ_31049	Santiago Vazquez, Montevideo, Uruguay.	0.037	2693	0.089	7.93651
Leptodactylus mystacinus	FNVJ_31049	Santiago Vazquez, Montevideo, Uruguay.	0.04	2644	0.088	7.8125
Leptodactylus mystacinus	FNVJ_31049	Santiago Vazquez, Montevideo, Uruguay.	0.037	2744	0.091	7.8125
Leptodactylus mystacinus	FNVJ_31049	Santiago Vazquez, Montevideo, Uruguay.	0.038	2718	0.087	8
Leptodactylus mystacinus	FNVJ_31049	Santiago Vazquez, Montevideo, Uruguay.	0.038	2668	0.098	7.35294
Leptodactylus mystacinus	FNVJ_31049	Santiago Vazquez, Montevideo, Uruguay.	0.038	2718	0.104	7.04225
Leptodactylus mystacinus	FNVJ_31049	Santiago Vazquez, Montevideo, Uruguay.	0.037	2693	0.1	7.29927
Leptodactylus mystacinus	FNVJ_31502	Oberá, Misiones, Argentina.	0.043	2252	0.111	6.49351
Leptodactylus mystacinus	FNVJ_31502	Oberá, Misiones, Argentina.	0.041	2292	0.11	6.62252
Leptodactylus mystacinus	FNVJ_31502	Oberá, Misiones, Argentina.	0.042	2213	0.108	6.66667
Leptodactylus mystacinus	FNVJ_31502	Oberá, Misiones, Argentina.	0.043	2213	0.119	6.17284
Leptodactylus mystacinus	FNVJ_31502	Oberá, Misiones, Argentina.	0.041	2272	0.115	6.41026
Leptodactylus mystacinus	FNVJ_31502	Oberá, Misiones, Argentina.	0.049	2312	0.112	6.21118
Leptodactylus mystacinus	FNVJ_31502	Oberá, Misiones, Argentina.	0.047	2272	0.11	6.36943
Leptodactylus mystacinus	FNVJ_31502	Oberá, Misiones, Argentina.	0.043	2272	0.112	6.45161
Leptodactylus mystacinus	FNVJ_31502	Oberá, Misiones, Argentina.	0.049	2296	0.115	6.09756
Leptodactylus mystacinus	FNVJ_31502	Oberá, Misiones, Argentina.	0.043	2272	0.107	6.66667
Leptodactylus mystacinus	FNVJ_31502	Oberá, Misiones, Argentina.	0.043	2272	0.115	6.32911
Leptodactylus mystacinus	FNVJ_31502	Oberá, Misiones, Argentina.	0.044	2272	0.117	6.21118
Leptodactylus mystacinus	FNVJ_31502	Oberá, Misiones, Argentina.	0.043	2272	0.118	6.21118
Leptodactylus mystacinus	FNVJ_31502	Oberá, Misiones, Argentina.	0.044	2272	0.119	6.13497
Leptodactylus mystacinus	FNVJ_31502	Oberá, Misiones, Argentina.	0.043	2312	0.11	6.53595
Leptodactylus mystacinus	FNVJ_31502	Oberá, Misiones, Argentina.	0.043	2292	0.116	6.28931
Leptodactylus mystacinus	FNVJ_31502	Oberá, Misiones, Argentina.	0.043	2292	0.118	6.21118
Leptodactylus mystacinus	FNVJ_31502	Oberá, Misiones, Argentina.	0.045	2272	0.116	6.21118
Leptodactylus mystacinus	FNVJ_31502	Oberá, Misiones, Argentina.	0.053	2272	0.11	6.13497
Leptodactylus mystacinus	FNVJ_31502	Oberá, Misiones, Argentina.	0.055	2312	0.098	6.53595
Leptodactylus mystacinus	FNVJ_31502	Oberá, Misiones, Argentina.	0.054	2312	0.096	6.66667
Leptodactylus mystacinus	FNVJ_31502	Oberá, Misiones, Argentina.	0.051	2292	0.107	6.32911
Leptodactylus mystacinus	FNVJ_31502	Oberá, Misiones, Argentina.	0.042	2292	0.107	6.71141
Leptodactylus mystacinus	FNVJ_31502	Oberá, Misiones, Argentina.	0.043	2312	0.118	6.21118
Leptodactylus mystacinus	FNVJ_31502	Oberá, Misiones, Argentina.	0.054	2292	0.119	5.78035
Leptodactylus mystacinus	FNVJ_31502	Oberá, Misiones, Argentina.	0.043	2312	0.118	6.21118
Leptodactylus mystacinus	FNVJ_31502	Oberá, Misiones, Argentina.	0.043	2312	0.114	6.36943
Leptodactylus mystacinus	FNVJ_31502	Oberá, Misiones, Argentina.	0.048	2233	0.112	6.25
Leptodactylus mystacinus	FNVJ_31502	Oberá, Misiones, Argentina.	0.044	2233	0.12	6.09756
Leptodactylus mystacinus	FNVJ_31502	Oberá, Misiones, Argentina.	0.044	2233	0.124	5.95238
Leptodactylus mystacinus	FNVJ_31502	Oberá, Misiones, Argentina.	0.048	2252	0.107	6.45161
Leptodactylus mystacinus	FNVJ_31502	Oberá, Misiones, Argentina.	0.047	2252	0.112	6.28931
Leptodactylus mystacinus	FNVJ_31502	Oberá, Misiones, Argentina.	0.045	2252	0.112	6.36943
Leptodactylus mystacinus	FNVJ_31502	Oberá, Misiones, Argentina.	0.046	2272	0.122	5.95238
Leptodactylus mystacinus	FNVJ_31502	Oberá, Misiones, Argentina.	0.047	2272	0.122	5.91716
Leptodactylus mystacinus	FNVJ_31502	Oberá, Misiones, Argentina.	0.048	2272	0.112	6.25
Leptodactylus mystacinus	FNVJ_31502	Oberá, Misiones, Argentina.	0.045	2292	0.11	6.45161
Leptodactylus mystacinus	FNVJ_31502	Oberá, Misiones, Argentina.	0.045	2292	0.118	6.13497
Leptodactylus mystacinus	FNVJ_31502	Oberá, Misiones, Argentina.	0.044	2292	0.117	6.21118
Leptodactylus mystacinus	FNVJ_31502	Oberá, Misiones, Argentina.	0.047	2233	0.118	6.06061
Leptodactylus mystacinus	FNVJ_31502	Oberá, Misiones, Argentina.	0.042	2252	0.105	6.80272
Leptodactylus mystacinus	FNVJ_31502	Oberá, Misiones, Argentina.	0.046	2252	0.111	6.36943
Leptodactylus mystacinus	FNVJ_31502	Oberá, Misiones, Argentina.	0.047	2272	0.115	6.17284
Leptodactylus mystacinus	FNVJ_31502	Oberá, Misiones, Argentina.	0.043	2272	0.115	6.32911
Leptodactylus mystacinus	FNVJ_31502	Oberá, Misiones, Argentina.	0.045	2233	0.114	6.28931
Leptodactylus mystacinus	FNVJ_31502	Oberá, Misiones, Argentina.	0.043	2233	0.109	6.57895
Leptodactylus mystacinus	FNVJ_31502	Oberá, Misiones, Argentina.	0.044	2233	0.107	6.62252
Leptodactylus mystacinus	FNVJ_31502	Oberá, Misiones, Argentina.	0.043	2252	0.114	6.36943
Leptodactylus mystacinus	FNVJ_31502	Oberá, Misiones, Argentina.	0.044	2252	0.114	6.32911
Leptodactylus mystacinus	FNVJ_31502	Oberá, Misiones, Argentina.	0.046	2252	0.116	6.17284
Leptodactylus mystacinus	FNVJ_32074	Campinas, São Paulo, Brazil.	0.042	2272	0.107	6.71141
Leptodactylus mystacinus	FNVJ_32074	Campinas, São Paulo, Brazil.	0.042	2272	0.1	7.04225
Leptodactylus mystacinus	FNVJ_32074	Campinas, São Paulo, Brazil.	0.046	2272	0.102	6.75676
Leptodactylus mystacinus	FNVJ_32074	Campinas, São Paulo, Brazil.	0.048	2272	0.1	6.75676
Leptodactylus mystacinus	FNVJ_32074	Campinas, São Paulo, Brazil.	0.044	2292	0.11	6.49351
Leptodactylus mystacinus	FNVJ_32074	Campinas, São Paulo, Brazil.	0.048	2292	0.107	6.45161
Leptodactylus mystacinus	FNVJ_32074	Campinas, São Paulo, Brazil.	0.049	2292	0.156	4.87805
Leptodactylus mystacinus	FNVJ_32074	Campinas, São Paulo, Brazil.	0.049	2292	0.118	5.98802
Leptodactylus mystacinus	FNVJ_32074	Campinas, São Paulo, Brazil.	0.047	2292	0.143	5.26316
Leptodactylus mystacinus	FNVJ_32074	Campinas, São Paulo, Brazil.	0.049	2292	0.099	6.75676
Leptodactylus mystacinus	FNVJ_32074	Campinas, São Paulo, Brazil.	0.044	2292	0.102	6.84932
Leptodactylus mystacinus	FNVJ_32074	Campinas, São Paulo, Brazil.	0.05	2292	0.16	4.7619
Leptodactylus mystacinus	FNVJ_32074	Campinas, São Paulo, Brazil.	0.051	2292	0.146	5.07614
Leptodactylus mystacinus	FNVJ_32074	Campinas, São Paulo, Brazil.	0.047	2312	0.135	5.49451
Leptodactylus mystacinus	FNVJ_32074	Campinas, São Paulo, Brazil.	0.045	2312	0.136	5.52486
Leptodactylus mystacinus	FNVJ_32074	Campinas, São Paulo, Brazil.	0.046	2312	0.112	6.32911
Leptodactylus mystacinus	FNVJ_32074	Campinas, São Paulo, Brazil.	0.048	2278	0.107	6.45161
Leptodactylus mystacinus	FNVJ_32074	Campinas, São Paulo, Brazil.	0.049	2292	0.134	5.46448
Leptodactylus mystacinus	FNVJ_32074	Campinas, São Paulo, Brazil.	0.049	2292	0.12	5.91716
Leptodactylus mystacinus	FNVJ_32074	Campinas, São Paulo, Brazil.	0.046	2292	0.107	6.53595
Leptodactylus mystacinus	FNVJ_32074	Campinas, São Paulo, Brazil.	0.045	2292	0.105	6.66667
Leptodactylus mystacinus	FNVJ_32074	Campinas, São Paulo, Brazil.	0.046	2312	0.125	5.84795
Leptodactylus mystacinus	FNVJ_32074	Campinas, São Paulo, Brazil.	0.047	2312	0.11	6.36943
Leptodactylus mystacinus	FNVJ_32074	Campinas, São Paulo, Brazil.	0.049	2272	0.118	5.98802
Leptodactylus mystacinus	FNVJ_32074	Campinas, São Paulo, Brazil.	0.044	2292	0.115	6.28931
Leptodactylus mystacinus	FNVJ_32074	Campinas, São Paulo, Brazil.	0.049	2292	0.116	6.06061
Leptodactylus mystacinus	FNVJ_32074	Campinas, São Paulo, Brazil.	0.049	2292	0.106	6.45161
Leptodactylus mystacinus	FNVJ_32074	Campinas, São Paulo, Brazil.	0.044	2292	0.118	6.17284
Leptodactylus mystacinus	FNVJ_32074	Campinas, São Paulo, Brazil.	0.046	2292	0.15	5.10204
Leptodactylus mystacinus	FNVJ_32074	Campinas, São Paulo, Brazil.	0.05	2252	0.107	6.36943
Leptodactylus mystacinus	FNVJ_32074	Campinas, São Paulo, Brazil.	0.049	2272	0.109	6.32911
Leptodactylus mystacinus	FNVJ_32074	Campinas, São Paulo, Brazil.	0.049	2272	0.103	6.57895
Leptodactylus mystacinus	FNVJ_32074	Campinas, São Paulo, Brazil.	0.054	2292	0.108	6.17284
Leptodactylus mystacinus	FNVJ_32074	Campinas, São Paulo, Brazil.	0.051	2292	0.111	6.17284
Leptodactylus mystacinus	FNVJ_32074	Campinas, São Paulo, Brazil.	0.049	2292	0.111	6.25
Leptodactylus mystacinus	FNVJ_32074	Campinas, São Paulo, Brazil.	0.051	2292	0.11	6.21118
Leptodactylus mystacinus	FNVJ_32074	Campinas, São Paulo, Brazil.	0.056	2292	0.12	5.68182
Leptodactylus mystacinus	FNVJ_32074	Campinas, São Paulo, Brazil.	0.049	2312	0.109	6.32911
Leptodactylus mystacinus	FNVJ_32074	Campinas, São Paulo, Brazil.	0.056	2272	0.108	6.09756
Leptodactylus mystacinus	FNVJ_32074	Campinas, São Paulo, Brazil.	0.053	2252	0.108	6.21118
Leptodactylus mystacinus	FNVJ_32074	Campinas, São Paulo, Brazil.	0.054	2252	0.115	5.91716
Leptodactylus mystacinus	FNVJ_32074	Campinas, São Paulo, Brazil.	0.047	2272	0.108	6.45161
Leptodactylus mystacinus	FNVJ_32074	Campinas, São Paulo, Brazil.	0.048	2272	0.113	6.21118
Leptodactylus mystacinus	FNVJ_32074	Campinas, São Paulo, Brazil.	0.05	2272	0.107	6.36943
Leptodactylus mystacinus	FNVJ_32074	Campinas, São Paulo, Brazil.	0.052	2292	0.101	6.53595
Leptodactylus mystacinus	FNVJ_32074	Campinas, São Paulo, Brazil.	0.051	2312	0.11	6.21118
Leptodactylus mystacinus	FNVJ_32074	Campinas, São Paulo, Brazil.	0.053	2312	0.101	6.49351
Leptodactylus mystacinus	FNVJ_32074	Campinas, São Paulo, Brazil.	0.055	2272	0.108	6.13497
Leptodactylus mystacinus	FNVJ_32074	Campinas, São Paulo, Brazil.	0.054	2312	0.115	5.91716
Leptodactylus mystacinus	FNVJ_32074	Campinas, São Paulo, Brazil.	0.054	2272	0.117	5.84795
Leptodactylus mystacinus	FNVJ_32150	Valinhos, São Paulo, Brazil.	0.041	2312	0.13	5.84795
Leptodactylus mystacinus	FNVJ_32150	Valinhos, São Paulo, Brazil.	0.042	2312	0.134	5.68182
Leptodactylus mystacinus	FNVJ_32150	Valinhos, São Paulo, Brazil.	0.043	2312	0.113	6.41026
Leptodactylus mystacinus	FNVJ_32150	Valinhos, São Paulo, Brazil.	0.042	2393	0.12	6.17284
Leptodactylus mystacinus	FNVJ_32150	Valinhos, São Paulo, Brazil.	0.048	2418	0.129	5.64972
Leptodactylus mystacinus	FNVJ_32150	Valinhos, São Paulo, Brazil.	0.047	2332	0.121	5.95238
Leptodactylus mystacinus	FNVJ_32150	Valinhos, São Paulo, Brazil.	0.048	2414	0.121	5.91716
Leptodactylus mystacinus	FNVJ_32150	Valinhos, São Paulo, Brazil.	0.043	2414	0.135	5.61798
Leptodactylus mystacinus	FNVJ_32150	Valinhos, São Paulo, Brazil.	0.041	2499	0.12	6.21118
Leptodactylus mystacinus	FNVJ_32150	Valinhos, São Paulo, Brazil.	0.047	2414	0.124	5.84795
Leptodactylus mystacinus	FNVJ_32150	Valinhos, São Paulo, Brazil.	0.047	2414	0.121	5.95238
Leptodactylus mystacinus	FNVJ_32150	Valinhos, São Paulo, Brazil.	0.046	2414	0.135	5.52486
Leptodactylus mystacinus	FNVJ_32150	Valinhos, São Paulo, Brazil.	0.051	2435	0.121	5.81395
Leptodactylus mystacinus	FNVJ_32150	Valinhos, São Paulo, Brazil.	0.049	2414	0.11	6.28931
Leptodactylus mystacinus	FNVJ_32150	Valinhos, São Paulo, Brazil.	0.051	2414	0.124	5.71429
Leptodactylus mystacinus	FNVJ_32150	Valinhos, São Paulo, Brazil.	0.045	2393	0.129	5.74713
Leptodactylus mystacinus	FNVJ_32150	Valinhos, São Paulo, Brazil.	0.043	2332	0.129	5.81395
Leptodactylus mystacinus	FNVJ_32150	Valinhos, São Paulo, Brazil.	0.044	2395	0.125	5.91716
Leptodactylus mystacinus	FNVJ_32150	Valinhos, São Paulo, Brazil.	0.044	2435	0.125	5.91716
Leptodactylus mystacinus	FNVJ_32150	Valinhos, São Paulo, Brazil.	0.046	2414	0.122	5.95238
Leptodactylus mystacinus	FNVJ_32150	Valinhos, São Paulo, Brazil.	0.046	2414	0.12	6.0241
Leptodactylus mystacinus	FNVJ_32150	Valinhos, São Paulo, Brazil.	0.052	2332	0.11	6.17284
Leptodactylus mystacinus	FNVJ_32150	Valinhos, São Paulo, Brazil.	0.047	2435	0.117	6.09756
Leptodactylus mystacinus	FNVJ_32150	Valinhos, São Paulo, Brazil.	0.048	2435	0.118	6.0241
Leptodactylus mystacinus	FNVJ_32150	Valinhos, São Paulo, Brazil.	0.045	2435	0.118	6.13497
Leptodactylus mystacinus	FNVJ_32150	Valinhos, São Paulo, Brazil.	0.048	2393	0.124	5.81395
Leptodactylus mystacinus	FNVJ_32150	Valinhos, São Paulo, Brazil.	0.042	2393	0.136	5.61798
Leptodactylus mystacinus	FNVJ_32150	Valinhos, São Paulo, Brazil.	0.049	2456	0.115	6.09756
Leptodactylus mystacinus	FNVJ_32150	Valinhos, São Paulo, Brazil.	0.048	2456	0.118	6.0241
Leptodactylus mystacinus	FNVJ_32150	Valinhos, São Paulo, Brazil.	0.048	2435	0.119	5.98802
Leptodactylus mystacinus	FNVJ_32517	Valinhos, São Paulo, Brazil.	0.046	2435	0.116	6.17284
Leptodactylus mystacinus	FNVJ_32517	Valinhos, São Paulo, Brazil.	0.045	2435	0.121	6.0241
Leptodactylus mystacinus	FNVJ_32517	Valinhos, São Paulo, Brazil.	0.043	2435	0.12	6.13497
Leptodactylus mystacinus	FNVJ_32517	Valinhos, São Paulo, Brazil.	0.046	2414	0.112	6.32911
Leptodactylus mystacinus	FNVJ_32517	Valinhos, São Paulo, Brazil.	0.051	2431	0.115	6.0241
Leptodactylus mystacinus	FNVJ_32517	Valinhos, São Paulo, Brazil.	0.049	2431	0.12	5.91716
Leptodactylus mystacinus	FNVJ_32517	Valinhos, São Paulo, Brazil.	0.045	2431	0.116	6.21118
Leptodactylus mystacinus	FNVJ_32517	Valinhos, São Paulo, Brazil.	0.048	2414	0.113	6.21118
Leptodactylus mystacinus	FNVJ_32517	Valinhos, São Paulo, Brazil.	0.041	2456	0.12	6.21118
Leptodactylus mystacinus	FNVJ_32517	Valinhos, São Paulo, Brazil.	0.047	2393	0.109	6.41026
Leptodactylus mystacinus	FNVJ_32517	Valinhos, São Paulo, Brazil.	0.049	2435	0.119	5.95238
Leptodactylus mystacinus	FNVJ_32517	Valinhos, São Paulo, Brazil.	0.048	2456	0.116	6.09756
Leptodactylus mystacinus	FNVJ_32517	Valinhos, São Paulo, Brazil.	0.047	2456	0.112	6.28931
Leptodactylus mystacinus	FNVJ_32517	Valinhos, São Paulo, Brazil.	0.047	2435	0.124	5.84795
Leptodactylus mystacinus	FNVJ_32517	Valinhos, São Paulo, Brazil.	0.045	2456	0.124	5.91716
Leptodactylus mystacinus	FNVJ_32517	Valinhos, São Paulo, Brazil.	0.047	2414	0.12	5.98802
Leptodactylus mystacinus	FNVJ_32517	Valinhos, São Paulo, Brazil.	0.052	2414	0.119	5.84795
Leptodactylus mystacinus	FNVJ_32517	Valinhos, São Paulo, Brazil.	0.045	2414	0.112	6.36943
Leptodactylus mystacinus	FNVJ_32517	Valinhos, São Paulo, Brazil.	0.046	2435	0.12	6.0241
Leptodactylus mystacinus	FNVJ_32517	Valinhos, São Paulo, Brazil.	0.046	2456	0.12	6.0241
Leptodactylus mystacinus	FNVJ_32517	Valinhos, São Paulo, Brazil.	0.051	2478	0.149	5
Leptodactylus mystacinus	FNVJ_32517	Valinhos, São Paulo, Brazil.	0.05	2478	0.154	4.90196
Leptodactylus mystacinus	FNVJ_32517	Valinhos, São Paulo, Brazil.	0.046	2435	0.192	4.20168
Leptodactylus mystacinus	FNVJ_32517	Valinhos, São Paulo, Brazil.	0.048	2478	0.162	4.7619
Leptodactylus mystacinus	FNVJ_32517	Valinhos, São Paulo, Brazil.	0.049	2478	0.167	4.62963
Leptodactylus mystacinus	FNVJ_32517	Valinhos, São Paulo, Brazil.	0.048	2435	0.151	5.02513
Leptodactylus mystacinus	FNVJ_32517	Valinhos, São Paulo, Brazil.	0.052	2478	0.148	5
Leptodactylus mystacinus	FNVJ_32517	Valinhos, São Paulo, Brazil.	0.052	2435	0.158	4.7619
Leptodactylus mystacinus	FNVJ_32517	Valinhos, São Paulo, Brazil.	0.048	2478	0.153	4.97512
Leptodactylus mystacinus	FNVJ_32517	Valinhos, São Paulo, Brazil.	0.054	2478	0.148	4.9505
Leptodactylus mystacinus	FNVJ_32518	Valinhos, São Paulo, Brazil.	0.052	2414	0.15	4.9505
Leptodactylus mystacinus	FNVJ_32518	Valinhos, São Paulo, Brazil.	0.049	2414	0.17	4.56621
Leptodactylus mystacinus	FNVJ_32518	Valinhos, São Paulo, Brazil.	0.052	2414	0.136	5.31915
Leptodactylus mystacinus	FNVJ_32518	Valinhos, São Paulo, Brazil.	0.049	2414	0.134	5.46448
Leptodactylus mystacinus	FNVJ_32518	Valinhos, São Paulo, Brazil.	0.055	2393	0.157	4.71698
Leptodactylus mystacinus	FNVJ_32518	Valinhos, São Paulo, Brazil.	0.054	2456	0.151	4.87805
Leptodactylus mystacinus	FNVJ_32518	Valinhos, São Paulo, Brazil.	0.05	2435	0.153	4.92611
Leptodactylus mystacinus	FNVJ_32518	Valinhos, São Paulo, Brazil.	0.052	2435	0.15	4.9505
Leptodactylus mystacinus	FNVJ_32518	Valinhos, São Paulo, Brazil.	0.048	2435	0.16	4.80769
Leptodactylus mystacinus	FNVJ_32518	Valinhos, São Paulo, Brazil.	0.051	2414	0.162	4.69484
Leptodactylus mystacinus	FNVJ_32518	Valinhos, São Paulo, Brazil.	0.052	2414	0.168	4.54545
Leptodactylus mystacinus	FNVJ_32518	Valinhos, São Paulo, Brazil.	0.053	2393	0.127	5.55556
Leptodactylus mystacinus	FNVJ_32518	Valinhos, São Paulo, Brazil.	0.049	2431	0.12	5.91716
Leptodactylus mystacinus	FNVJ_32518	Valinhos, São Paulo, Brazil.	0.045	2431	0.116	6.21118
Leptodactylus mystacinus	FNVJ_32518	Valinhos, São Paulo, Brazil.	0.048	2414	0.113	6.21118
Leptodactylus mystacinus	FNVJ_32518	Valinhos, São Paulo, Brazil.	0.041	2456	0.12	6.21118
Leptodactylus mystacinus	FNVJ_32518	Valinhos, São Paulo, Brazil.	0.047	2393	0.109	6.41026
Leptodactylus mystacinus	FNVJ_32518	Valinhos, São Paulo, Brazil.	0.049	2435	0.119	5.95238
Leptodactylus mystacinus	FNVJ_32518	Valinhos, São Paulo, Brazil.	0.048	2456	0.116	6.09756
Leptodactylus mystacinus	FNVJ_32518	Valinhos, São Paulo, Brazil.	0.047	2456	0.112	6.28931
Leptodactylus mystacinus	FNVJ_32518	Valinhos, São Paulo, Brazil.	0.047	2435	0.124	5.84795
Leptodactylus mystacinus	FNVJ_32518	Valinhos, São Paulo, Brazil.	0.045	2456	0.124	5.91716
Leptodactylus mystacinus	FNVJ_32518	Valinhos, São Paulo, Brazil.	0.047	2414	0.12	5.98802
Leptodactylus mystacinus	FNVJ_32518	Valinhos, São Paulo, Brazil.	0.052	2414	0.119	5.84795
Leptodactylus mystacinus	FNVJ_32518	Valinhos, São Paulo, Brazil.	0.045	2414	0.112	6.36943
Leptodactylus mystacinus	FNVJ_32518	Valinhos, São Paulo, Brazil.	0.046	2435	0.12	6.0241
Leptodactylus mystacinus	FNVJ_32518	Valinhos, São Paulo, Brazil.	0.046	2456	0.12	6.0241
Leptodactylus mystacinus	FNVJ_32518	Valinhos, São Paulo, Brazil.	0.051	2478	0.149	5
Leptodactylus mystacinus	FNVJ_32518	Valinhos, São Paulo, Brazil.	0.05	2478	0.154	4.90196
Leptodactylus mystacinus	FNVJ_32518	Valinhos, São Paulo, Brazil.	0.046	2435	0.192	4.20168
Leptodactylus mystacinus	FNVJ_33149	Campinas, São Paulo, Brazil.	0.05	2252	0.107	6.36943
Leptodactylus mystacinus	FNVJ_33149	Campinas, São Paulo, Brazil.	0.053	2252	0.108	6.21118
Leptodactylus mystacinus	FNVJ_33149	Campinas, São Paulo, Brazil.	0.054	2252	0.115	5.91716
Leptodactylus mystacinus	FNVJ_33149	Campinas, São Paulo, Brazil.	0.042	2272	0.107	6.71141
Leptodactylus mystacinus	FNVJ_33149	Campinas, São Paulo, Brazil.	0.042	2272	0.1	7.04225
Leptodactylus mystacinus	FNVJ_33149	Campinas, São Paulo, Brazil.	0.046	2272	0.102	6.75676
Leptodactylus mystacinus	FNVJ_33149	Campinas, São Paulo, Brazil.	0.048	2272	0.1	6.75676
Leptodactylus mystacinus	FNVJ_33149	Campinas, São Paulo, Brazil.	0.049	2272	0.118	5.98802
Leptodactylus mystacinus	FNVJ_33149	Campinas, São Paulo, Brazil.	0.049	2272	0.109	6.32911
Leptodactylus mystacinus	FNVJ_33149	Campinas, São Paulo, Brazil.	0.049	2272	0.103	6.57895
Leptodactylus mystacinus	FNVJ_33149	Campinas, São Paulo, Brazil.	0.056	2272	0.108	6.09756
Leptodactylus mystacinus	FNVJ_33149	Campinas, São Paulo, Brazil.	0.047	2272	0.108	6.45161
Leptodactylus mystacinus	FNVJ_33149	Campinas, São Paulo, Brazil.	0.048	2272	0.113	6.21118
Leptodactylus mystacinus	FNVJ_33149	Campinas, São Paulo, Brazil.	0.05	2272	0.107	6.36943
Leptodactylus mystacinus	FNVJ_33149	Campinas, São Paulo, Brazil.	0.055	2272	0.108	6.13497
Leptodactylus mystacinus	FNVJ_33149	Campinas, São Paulo, Brazil.	0.054	2272	0.117	5.84795
Leptodactylus mystacinus	FNVJ_33149	Campinas, São Paulo, Brazil.	0.048	2278	0.107	6.45161
Leptodactylus mystacinus	FNVJ_33149	Campinas, São Paulo, Brazil.	0.044	2292	0.11	6.49351
Leptodactylus mystacinus	FNVJ_33149	Campinas, São Paulo, Brazil.	0.048	2292	0.107	6.45161
Leptodactylus mystacinus	FNVJ_33149	Campinas, São Paulo, Brazil.	0.049	2292	0.156	4.87805
Leptodactylus mystacinus	FNVJ_33149	Campinas, São Paulo, Brazil.	0.049	2292	0.118	5.98802
Leptodactylus mystacinus	FNVJ_33149	Campinas, São Paulo, Brazil.	0.047	2292	0.143	5.26316
Leptodactylus mystacinus	FNVJ_33149	Campinas, São Paulo, Brazil.	0.049	2292	0.099	6.75676
Leptodactylus mystacinus	FNVJ_33149	Campinas, São Paulo, Brazil.	0.044	2292	0.102	6.84932
Leptodactylus mystacinus	FNVJ_33149	Campinas, São Paulo, Brazil.	0.05	2292	0.16	4.7619
Leptodactylus mystacinus	FNVJ_33149	Campinas, São Paulo, Brazil.	0.051	2292	0.146	5.07614
Leptodactylus mystacinus	FNVJ_33149	Campinas, São Paulo, Brazil.	0.049	2292	0.134	5.46448
Leptodactylus mystacinus	FNVJ_33149	Campinas, São Paulo, Brazil.	0.049	2292	0.12	5.91716
Leptodactylus mystacinus	FNVJ_33149	Campinas, São Paulo, Brazil.	0.046	2292	0.107	6.53595
Leptodactylus mystacinus	FNVJ_33149	Campinas, São Paulo, Brazil.	0.045	2292	0.105	6.66667
Leptodactylus mystacinus	FNVJ_34064	Piracicaba, São Paulo, Brazil.	0.044	2292	0.115	6.28931
Leptodactylus mystacinus	FNVJ_34064	Piracicaba, São Paulo, Brazil.	0.049	2292	0.116	6.06061
Leptodactylus mystacinus	FNVJ_34064	Piracicaba, São Paulo, Brazil.	0.049	2292	0.106	6.45161
Leptodactylus mystacinus	FNVJ_34064	Piracicaba, São Paulo, Brazil.	0.044	2292	0.118	6.17284
Leptodactylus mystacinus	FNVJ_34064	Piracicaba, São Paulo, Brazil.	0.046	2292	0.15	5.10204
Leptodactylus mystacinus	FNVJ_34064	Piracicaba, São Paulo, Brazil.	0.054	2292	0.108	6.17284
Leptodactylus mystacinus	FNVJ_34064	Piracicaba, São Paulo, Brazil.	0.051	2292	0.111	6.17284
Leptodactylus mystacinus	FNVJ_34064	Piracicaba, São Paulo, Brazil.	0.049	2292	0.111	6.25
Leptodactylus mystacinus	FNVJ_34064	Piracicaba, São Paulo, Brazil.	0.051	2292	0.11	6.21118
Leptodactylus mystacinus	FNVJ_34064	Piracicaba, São Paulo, Brazil.	0.056	2292	0.12	5.68182
Leptodactylus mystacinus	FNVJ_34064	Piracicaba, São Paulo, Brazil.	0.052	2292	0.101	6.53595
Leptodactylus mystacinus	FNVJ_34064	Piracicaba, São Paulo, Brazil.	0.047	2312	0.135	5.49451
Leptodactylus mystacinus	FNVJ_34064	Piracicaba, São Paulo, Brazil.	0.045	2312	0.136	5.52486
Leptodactylus mystacinus	FNVJ_34064	Piracicaba, São Paulo, Brazil.	0.046	2312	0.112	6.32911
Leptodactylus mystacinus	FNVJ_34064	Piracicaba, São Paulo, Brazil.	0.046	2312	0.125	5.84795
Leptodactylus mystacinus	FNVJ_34064	Piracicaba, São Paulo, Brazil.	0.047	2312	0.11	6.36943
Leptodactylus mystacinus	FNVJ_34064	Piracicaba, São Paulo, Brazil.	0.049	2312	0.109	6.32911
Leptodactylus mystacinus	FNVJ_34064	Piracicaba, São Paulo, Brazil.	0.051	2312	0.11	6.21118
Leptodactylus mystacinus	FNVJ_34064	Piracicaba, São Paulo, Brazil.	0.053	2312	0.101	6.49351
Leptodactylus mystacinus	FNVJ_34064	Piracicaba, São Paulo, Brazil.	0.054	2312	0.115	5.91716
Leptodactylus mystacinus	FNVJ_34064	Piracicaba, São Paulo, Brazil.	0.054	2322	0.113	5.98802
Leptodactylus mystacinus	FNVJ_34064	Piracicaba, São Paulo, Brazil.	0.056	2322	0.122	5.61798
Leptodactylus mystacinus	FNVJ_34064	Piracicaba, São Paulo, Brazil.	0.055	2322	0.11	6.06061
Leptodactylus mystacinus	FNVJ_34064	Piracicaba, São Paulo, Brazil.	0.046	2366	0.122	5.95238
Leptodactylus mystacinus	FNVJ_34064	Piracicaba, São Paulo, Brazil.	0.046	2366	0.123	5.91716
Leptodactylus mystacinus	FNVJ_34064	Piracicaba, São Paulo, Brazil.	0.046	2366	0.128	5.74713
Leptodactylus mystacinus	FNVJ_34064	Piracicaba, São Paulo, Brazil.	0.051	2366	0.113	6.09756
Leptodactylus mystacinus	FNVJ_34064	Piracicaba, São Paulo, Brazil.	0.045	2388	0.119	6.09756
Leptodactylus mystacinus	FNVJ_34064	Piracicaba, São Paulo, Brazil.	0.053	2388	0.11	6.13497
Leptodactylus mystacinus	FNVJ_36549	Trancoso, Bahia, Brazil.	0.052	2388	0.121	5.78035
Leptodactylus mystacinus	FNVJ_36549	Trancoso, Bahia, Brazil.	0.054	2388	0.127	5.52486
Leptodactylus mystacinus	FNVJ_36549	Trancoso, Bahia, Brazil.	0.046	2388	0.129	5.71429
Leptodactylus mystacinus	FNVJ_36549	Trancoso, Bahia, Brazil.	0.046	2410	0.115	6.21118
Leptodactylus mystacinus	FNVJ_36549	Trancoso, Bahia, Brazil.	0.047	2410	0.114	6.21118
Leptodactylus mystacinus	FNVJ_36549	Trancoso, Bahia, Brazil.	0.048	2410	0.117	6.06061
Leptodactylus mystacinus	FNVJ_36549	Trancoso, Bahia, Brazil.	0.045	2410	0.115	6.25
Leptodactylus mystacinus	FNVJ_36549	Trancoso, Bahia, Brazil.	0.046	2410	0.116	6.17284
Leptodactylus mystacinus	FNVJ_36549	Trancoso, Bahia, Brazil.	0.048	2410	0.111	6.28931
Leptodactylus mystacinus	FNVJ_36549	Trancoso, Bahia, Brazil.	0.046	2410	0.118	6.09756
Leptodactylus mystacinus	FNVJ_36549	Trancoso, Bahia, Brazil.	0.045	2410	0.123	5.95238
Leptodactylus mystacinus	FNVJ_36549	Trancoso, Bahia, Brazil.	0.044	2410	0.119	6.13497
Leptodactylus mystacinus	FNVJ_36549	Trancoso, Bahia, Brazil.	0.045	2410	0.129	5.74713
Leptodactylus mystacinus	FNVJ_36549	Trancoso, Bahia, Brazil.	0.044	2410	0.127	5.84795
Leptodactylus mystacinus	FNVJ_36549	Trancoso, Bahia, Brazil.	0.044	2410	0.122	6.0241
Leptodactylus mystacinus	FNVJ_36549	Trancoso, Bahia, Brazil.	0.043	2410	0.123	6.0241
Leptodactylus mystacinus	FNVJ_36549	Trancoso, Bahia, Brazil.	0.044	2410	0.127	5.84795
Leptodactylus mystacinus	FNVJ_36549	Trancoso, Bahia, Brazil.	0.045	2410	0.136	5.52486
Leptodactylus mystacinus	FNVJ_36549	Trancoso, Bahia, Brazil.	0.051	2410	0.132	5.46448
Leptodactylus mystacinus	FNVJ_36549	Trancoso, Bahia, Brazil.	0.044	2410	0.129	5.78035
Leptodactylus mystacinus	FNVJ_36549	Trancoso, Bahia, Brazil.	0.044	2410	0.131	5.71429
Leptodactylus mystacinus	FNVJ_36549	Trancoso, Bahia, Brazil.	0.049	2410	0.115	6.09756
Leptodactylus mystacinus	FNVJ_36549	Trancoso, Bahia, Brazil.	0.046	2410	0.123	5.91716
Leptodactylus mystacinus	FNVJ_36550	Trancoso, Bahia, Brazil.	0.048	2410	0.121	5.91716
Leptodactylus mystacinus	FNVJ_36550	Trancoso, Bahia, Brazil.	0.047	2410	0.122	5.91716
Leptodactylus mystacinus	FNVJ_36550	Trancoso, Bahia, Brazil.	0.044	2410	0.123	5.98802
Leptodactylus mystacinus	FNVJ_36550	Trancoso, Bahia, Brazil.	0.045	2410	0.117	6.17284
Leptodactylus mystacinus	FNVJ_36550	Trancoso, Bahia, Brazil.	0.05	2410	0.123	5.78035
Leptodactylus mystacinus	FNVJ_36550	Trancoso, Bahia, Brazil.	0.052	2414	0.15	4.9505
Leptodactylus mystacinus	FNVJ_36550	Trancoso, Bahia, Brazil.	0.049	2414	0.17	4.56621
Leptodactylus mystacinus	FNVJ_36550	Trancoso, Bahia, Brazil.	0.047	2432	0.115	6.17284
Leptodactylus mystacinus	FNVJ_36550	Trancoso, Bahia, Brazil.	0.047	2432	0.109	6.41026
Leptodactylus mystacinus	FNVJ_36550	Trancoso, Bahia, Brazil.	0.044	2432	0.121	6.06061
Leptodactylus mystacinus	FNVJ_36550	Trancoso, Bahia, Brazil.	0.046	2432	0.118	6.09756
Leptodactylus mystacinus	FNVJ_36550	Trancoso, Bahia, Brazil.	0.049	2432	0.127	5.68182
Leptodactylus mystacinus	FNVJ_36550	Trancoso, Bahia, Brazil.	0.045	2432	0.124	5.91716
Leptodactylus mystacinus	FNVJ_36550	Trancoso, Bahia, Brazil.	0.047	2432	0.124	5.84795
Leptodactylus mystacinus	FNVJ_36550	Trancoso, Bahia, Brazil.	0.048	2432	0.121	5.91716
Leptodactylus mystacinus	FNVJ_36550	Trancoso, Bahia, Brazil.	0.047	2432	0.122	5.91716
Leptodactylus mystacinus	FNVJ_36550	Trancoso, Bahia, Brazil.	0.048	2432	0.118	6.0241
Leptodactylus mystacinus	FNVJ_36550	Trancoso, Bahia, Brazil.	0.048	2435	0.151	5.02513
Leptodactylus mystacinus	FNVJ_36550	Trancoso, Bahia, Brazil.	0.052	2435	0.158	4.7619
Leptodactylus mystacinus	FNVJ_36550	Trancoso, Bahia, Brazil.	0.046	2455	0.119	6.06061
Leptodactylus mystacinus	FNVJ_36550	Trancoso, Bahia, Brazil.	0.046	2455	0.126	5.81395
Leptodactylus mystacinus	FNVJ_36550	Trancoso, Bahia, Brazil.	0.042	2455	0.125	5.98802
Leptodactylus mystacinus	FNVJ_36550	Trancoso, Bahia, Brazil.	0.048	2478	0.162	4.7619
Leptodactylus mystacinus	FNVJ_36550	Trancoso, Bahia, Brazil.	0.049	2478	0.167	4.62963
Leptodactylus mystacinus	FNVJ_36550	Trancoso, Bahia, Brazil.	0.052	2478	0.148	5
Leptodactylus mystacinus	FNVJ_36550	Trancoso, Bahia, Brazil.	0.048	2478	0.153	4.97512
Leptodactylus mystacinus	FNVJ_36550	Trancoso, Bahia, Brazil.	0.054	2478	0.148	4.9505
Leptodactylus mystacinus	16682	Derrubadas, Rio Grande do Sul, Brazil.	0.052	2435	0.158	4.7619
Leptodactylus mystacinus	16682	Derrubadas, Rio Grande do Sul, Brazil.	0.05	2435	0.153	4.92611
Leptodactylus mystacinus	16682	Derrubadas, Rio Grande do Sul, Brazil.	0.052	2435	0.15	4.9505
Leptodactylus mystacinus	16682	Derrubadas, Rio Grande do Sul, Brazil.	0.048	2435	0.16	4.80769
Leptodactylus mystacinus	16682	Derrubadas, Rio Grande do Sul, Brazil.	0.049	2435	0.119	5.95238
Leptodactylus mystacinus	16682	Derrubadas, Rio Grande do Sul, Brazil.	0.047	2435	0.124	5.84795
Leptodactylus mystacinus	16682	Derrubadas, Rio Grande do Sul, Brazil.	0.046	2435	0.12	6.0241
Leptodactylus mystacinus	16682	Derrubadas, Rio Grande do Sul, Brazil.	0.046	2435	0.192	4.20168
Leptodactylus mystacinus	16682	Derrubadas, Rio Grande do Sul, Brazil.	0.049	2456	0.115	6.09756
Leptodactylus mystacinus	16682	Derrubadas, Rio Grande do Sul, Brazil.	0.048	2456	0.118	6.0241
Leptodactylus mystacinus	16682	Derrubadas, Rio Grande do Sul, Brazil.	0.041	2456	0.12	6.21118
Leptodactylus mystacinus	16682	Derrubadas, Rio Grande do Sul, Brazil.	0.048	2456	0.116	6.09756
Leptodactylus mystacinus	16682	Derrubadas, Rio Grande do Sul, Brazil.	0.047	2456	0.112	6.28931
Leptodactylus mystacinus	16682	Derrubadas, Rio Grande do Sul, Brazil.	0.045	2456	0.124	5.91716
Leptodactylus mystacinus	16682	Derrubadas, Rio Grande do Sul, Brazil.	0.046	2456	0.12	6.0241
Leptodactylus mystacinus	16682	Derrubadas, Rio Grande do Sul, Brazil.	0.054	2456	0.151	4.87805
Leptodactylus mystacinus	16682	Derrubadas, Rio Grande do Sul, Brazil.	0.041	2456	0.12	6.21118
Leptodactylus mystacinus	16682	Derrubadas, Rio Grande do Sul, Brazil.	0.048	2456	0.116	6.09756
Leptodactylus mystacinus	16682	Derrubadas, Rio Grande do Sul, Brazil.	0.047	2456	0.112	6.28931
Leptodactylus mystacinus	16682	Derrubadas, Rio Grande do Sul, Brazil.	0.045	2456	0.124	5.91716
Leptodactylus mystacinus	16682	Derrubadas, Rio Grande do Sul, Brazil.	0.046	2456	0.12	6.0241
Leptodactylus mystacinus	16682	Derrubadas, Rio Grande do Sul, Brazil.	0.051	2478	0.149	5
Leptodactylus mystacinus	16682	Derrubadas, Rio Grande do Sul, Brazil.	0.05	2478	0.154	4.90196
Leptodactylus mystacinus	16682	Derrubadas, Rio Grande do Sul, Brazil.	0.048	2478	0.162	4.7619
Leptodactylus mystacinus	16682	Derrubadas, Rio Grande do Sul, Brazil.	0.049	2478	0.167	4.62963
Leptodactylus mystacinus	16682	Derrubadas, Rio Grande do Sul, Brazil.	0.052	2478	0.148	5
Leptodactylus mystacinus	16682	Derrubadas, Rio Grande do Sul, Brazil.	0.048	2478	0.153	4.97512
Leptodactylus mystacinus	16682	Derrubadas, Rio Grande do Sul, Brazil.	0.054	2478	0.148	4.9505
Leptodactylus mystacinus	16682	Derrubadas, Rio Grande do Sul, Brazil.	0.051	2478	0.149	5
Leptodactylus mystacinus	16682	Derrubadas, Rio Grande do Sul, Brazil.	0.05	2478	0.154	4.90196
Leptodactylus mystacinus	16709	Derrubadas, Rio Grande do Sul, Brazil.	0.041	2499	0.12	6.21118
Leptodactylus mystacinus	16709	Derrubadas, Rio Grande do Sul, Brazil.	0.041	2312	0.13	5.84795
Leptodactylus mystacinus	16709	Derrubadas, Rio Grande do Sul, Brazil.	0.042	2312	0.134	5.68182
Leptodactylus mystacinus	16709	Derrubadas, Rio Grande do Sul, Brazil.	0.043	2312	0.113	6.41026
Leptodactylus mystacinus	16709	Derrubadas, Rio Grande do Sul, Brazil.	0.047	2332	0.121	5.95238
Leptodactylus mystacinus	16709	Derrubadas, Rio Grande do Sul, Brazil.	0.043	2332	0.129	5.81395
Leptodactylus mystacinus	16709	Derrubadas, Rio Grande do Sul, Brazil.	0.052	2332	0.11	6.17284
Leptodactylus mystacinus	16709	Derrubadas, Rio Grande do Sul, Brazil.	0.042	2393	0.12	6.17284
Leptodactylus mystacinus	16709	Derrubadas, Rio Grande do Sul, Brazil.	0.045	2393	0.129	5.74713
Leptodactylus mystacinus	16709	Derrubadas, Rio Grande do Sul, Brazil.	0.048	2393	0.124	5.81395
Leptodactylus mystacinus	16709	Derrubadas, Rio Grande do Sul, Brazil.	0.042	2393	0.136	5.61798
Leptodactylus mystacinus	16709	Derrubadas, Rio Grande do Sul, Brazil.	0.047	2393	0.109	6.41026
Leptodactylus mystacinus	16709	Derrubadas, Rio Grande do Sul, Brazil.	0.055	2393	0.157	4.71698
Leptodactylus mystacinus	16709	Derrubadas, Rio Grande do Sul, Brazil.	0.053	2393	0.127	5.55556
Leptodactylus mystacinus	16709	Derrubadas, Rio Grande do Sul, Brazil.	0.047	2393	0.109	6.41026
Leptodactylus mystacinus	16709	Derrubadas, Rio Grande do Sul, Brazil.	0.044	2395	0.125	5.91716
Leptodactylus mystacinus	16709	Derrubadas, Rio Grande do Sul, Brazil.	0.048	2414	0.121	5.91716
Leptodactylus mystacinus	16709	Derrubadas, Rio Grande do Sul, Brazil.	0.043	2414	0.135	5.61798
Leptodactylus mystacinus	16709	Derrubadas, Rio Grande do Sul, Brazil.	0.047	2414	0.124	5.84795
Leptodactylus mystacinus	16709	Derrubadas, Rio Grande do Sul, Brazil.	0.047	2414	0.121	5.95238
Leptodactylus mystacinus	16709	Derrubadas, Rio Grande do Sul, Brazil.	0.046	2414	0.135	5.52486
Leptodactylus mystacinus	16709	Derrubadas, Rio Grande do Sul, Brazil.	0.049	2414	0.11	6.28931
Leptodactylus mystacinus	16709	Derrubadas, Rio Grande do Sul, Brazil.	0.051	2414	0.124	5.71429
Leptodactylus mystacinus	16709	Derrubadas, Rio Grande do Sul, Brazil.	0.046	2414	0.122	5.95238
Leptodactylus mystacinus	16709	Derrubadas, Rio Grande do Sul, Brazil.	0.046	2414	0.12	6.0241
Leptodactylus mystacinus	16709	Derrubadas, Rio Grande do Sul, Brazil.	0.046	2414	0.112	6.32911
Leptodactylus mystacinus	16709	Derrubadas, Rio Grande do Sul, Brazil.	0.048	2414	0.113	6.21118
Leptodactylus mystacinus	16709	Derrubadas, Rio Grande do Sul, Brazil.	0.047	2414	0.12	5.98802
Leptodactylus mystacinus	16709	Derrubadas, Rio Grande do Sul, Brazil.	0.052	2414	0.119	5.84795
Leptodactylus mystacinus	17019	Derrubadas, Rio Grande do Sul, Brazil.	0.045	2414	0.112	6.36943
Leptodactylus mystacinus	17019	Derrubadas, Rio Grande do Sul, Brazil.	0.052	2414	0.15	4.9505
Leptodactylus mystacinus	17019	Derrubadas, Rio Grande do Sul, Brazil.	0.049	2414	0.17	4.56621
Leptodactylus mystacinus	17019	Derrubadas, Rio Grande do Sul, Brazil.	0.052	2414	0.136	5.31915
Leptodactylus mystacinus	17019	Derrubadas, Rio Grande do Sul, Brazil.	0.049	2414	0.134	5.46448
Leptodactylus mystacinus	17019	Derrubadas, Rio Grande do Sul, Brazil.	0.051	2414	0.162	4.69484
Leptodactylus mystacinus	17019	Derrubadas, Rio Grande do Sul, Brazil.	0.052	2414	0.168	4.54545
Leptodactylus mystacinus	17019	Derrubadas, Rio Grande do Sul, Brazil.	0.048	2414	0.113	6.21118
Leptodactylus mystacinus	17019	Derrubadas, Rio Grande do Sul, Brazil.	0.047	2414	0.12	5.98802
Leptodactylus mystacinus	17019	Derrubadas, Rio Grande do Sul, Brazil.	0.052	2414	0.119	5.84795
Leptodactylus mystacinus	17019	Derrubadas, Rio Grande do Sul, Brazil.	0.045	2414	0.112	6.36943
Leptodactylus mystacinus	17019	Derrubadas, Rio Grande do Sul, Brazil.	0.048	2418	0.129	5.64972
Leptodactylus mystacinus	17019	Derrubadas, Rio Grande do Sul, Brazil.	0.051	2431	0.115	6.0241
Leptodactylus mystacinus	17019	Derrubadas, Rio Grande do Sul, Brazil.	0.049	2431	0.12	5.91716
Leptodactylus mystacinus	17019	Derrubadas, Rio Grande do Sul, Brazil.	0.045	2431	0.116	6.21118
Leptodactylus mystacinus	17019	Derrubadas, Rio Grande do Sul, Brazil.	0.049	2431	0.12	5.91716
Leptodactylus mystacinus	17019	Derrubadas, Rio Grande do Sul, Brazil.	0.045	2431	0.116	6.21118
Leptodactylus mystacinus	17019	Derrubadas, Rio Grande do Sul, Brazil.	0.051	2435	0.121	5.81395
Leptodactylus mystacinus	17019	Derrubadas, Rio Grande do Sul, Brazil.	0.044	2435	0.125	5.91716
Leptodactylus mystacinus	17019	Derrubadas, Rio Grande do Sul, Brazil.	0.047	2435	0.117	6.09756
Leptodactylus mystacinus	17019	Derrubadas, Rio Grande do Sul, Brazil.	0.048	2435	0.118	6.0241
Leptodactylus mystacinus	17019	Derrubadas, Rio Grande do Sul, Brazil.	0.045	2435	0.118	6.13497
Leptodactylus mystacinus	17019	Derrubadas, Rio Grande do Sul, Brazil.	0.048	2435	0.119	5.98802
Leptodactylus mystacinus	17019	Derrubadas, Rio Grande do Sul, Brazil.	0.046	2435	0.116	6.17284
Leptodactylus mystacinus	17019	Derrubadas, Rio Grande do Sul, Brazil.	0.045	2435	0.121	6.0241
Leptodactylus mystacinus	17019	Derrubadas, Rio Grande do Sul, Brazil.	0.043	2435	0.12	6.13497
Leptodactylus mystacinus	17019	Derrubadas, Rio Grande do Sul, Brazil.	0.049	2435	0.119	5.95238
Leptodactylus mystacinus	17019	Derrubadas, Rio Grande do Sul, Brazil.	0.047	2435	0.124	5.84795
Leptodactylus mystacinus	17019	Derrubadas, Rio Grande do Sul, Brazil.	0.046	2435	0.12	6.0241
Leptodactylus mystacinus	17019	Derrubadas, Rio Grande do Sul, Brazil.	0.046	2435	0.192	4.20168
Leptodactylus mystacinus	17019	Derrubadas, Rio Grande do Sul, Brazil.	0.048	2435	0.151	5.02513
Leptodactylus mystacinus	16980	Candiota, Rio Grande do Sul, Brazil.	0.053	2388	0.11	6.13497
Leptodactylus mystacinus	16980	Candiota, Rio Grande do Sul, Brazil.	0.055	2322	0.11	6.06061
Leptodactylus mystacinus	16980	Candiota, Rio Grande do Sul, Brazil.	0.054	2322	0.113	5.98802
Leptodactylus mystacinus	16980	Candiota, Rio Grande do Sul, Brazil.	0.051	2366	0.113	6.09756
Leptodactylus mystacinus	16980	Candiota, Rio Grande do Sul, Brazil.	0.045	2410	0.117	6.17284
Leptodactylus mystacinus	16980	Candiota, Rio Grande do Sul, Brazil.	0.048	2432	0.118	6.0241
Leptodactylus mystacinus	16980	Candiota, Rio Grande do Sul, Brazil.	0.048	2410	0.121	5.91716
Leptodactylus mystacinus	16980	Candiota, Rio Grande do Sul, Brazil.	0.048	2432	0.121	5.91716
Leptodactylus mystacinus	16980	Candiota, Rio Grande do Sul, Brazil.	0.052	2388	0.121	5.78035
Leptodactylus mystacinus	16980	Candiota, Rio Grande do Sul, Brazil.	0.047	2432	0.122	5.91716
Leptodactylus mystacinus	16980	Candiota, Rio Grande do Sul, Brazil.	0.046	2366	0.122	5.95238
Leptodactylus mystacinus	16980	Candiota, Rio Grande do Sul, Brazil.	0.047	2410	0.122	5.91716
Leptodactylus mystacinus	16980	Candiota, Rio Grande do Sul, Brazil.	0.056	2322	0.122	5.61798
Leptodactylus mystacinus	16980	Candiota, Rio Grande do Sul, Brazil.	0.046	2410	0.123	5.91716
Leptodactylus mystacinus	16980	Candiota, Rio Grande do Sul, Brazil.	0.046	2366	0.123	5.91716
Leptodactylus mystacinus	16980	Candiota, Rio Grande do Sul, Brazil.	0.044	2410	0.123	5.98802
Leptodactylus mystacinus	16980	Candiota, Rio Grande do Sul, Brazil.	0.05	2410	0.123	5.78035
Leptodactylus mystacinus	16980	Candiota, Rio Grande do Sul, Brazil.	0.054	2388	0.127	5.52486
Leptodactylus mystacinus	16980	Candiota, Rio Grande do Sul, Brazil.	0.046	2366	0.128	5.74713
Leptodactylus mystacinus	16980	Candiota, Rio Grande do Sul, Brazil.	0.046	2388	0.129	5.71429
Leptodactylus mystacinus	17276	Santa Cruz do Sul, Rio Grande do Sul, Brazil.	0.045	2414	0.112	6.36943
Leptodactylus mystacinus	17276	Santa Cruz do Sul, Rio Grande do Sul, Brazil.	0.045	2414	0.112	6.36943
Leptodactylus mystacinus	17276	Santa Cruz do Sul, Rio Grande do Sul, Brazil.	0.048	2414	0.113	6.21118
Leptodactylus mystacinus	17276	Santa Cruz do Sul, Rio Grande do Sul, Brazil.	0.051	2431	0.115	6.0241
Leptodactylus mystacinus	17276	Santa Cruz do Sul, Rio Grande do Sul, Brazil.	0.045	2431	0.116	6.21118
Leptodactylus mystacinus	17276	Santa Cruz do Sul, Rio Grande do Sul, Brazil.	0.045	2431	0.116	6.21118
Leptodactylus mystacinus	17276	Santa Cruz do Sul, Rio Grande do Sul, Brazil.	0.052	2414	0.119	5.84795
Leptodactylus mystacinus	17276	Santa Cruz do Sul, Rio Grande do Sul, Brazil.	0.052	2414	0.119	5.84795
Leptodactylus mystacinus	17276	Santa Cruz do Sul, Rio Grande do Sul, Brazil.	0.047	2414	0.12	5.98802
Leptodactylus mystacinus	17276	Santa Cruz do Sul, Rio Grande do Sul, Brazil.	0.047	2414	0.12	5.98802
Leptodactylus mystacinus	17276	Santa Cruz do Sul, Rio Grande do Sul, Brazil.	0.049	2431	0.12	5.91716
Leptodactylus mystacinus	17276	Santa Cruz do Sul, Rio Grande do Sul, Brazil.	0.049	2431	0.12	5.91716
Leptodactylus mystacinus	17276	Santa Cruz do Sul, Rio Grande do Sul, Brazil.	0.048	2418	0.129	5.64972
Leptodactylus mystacinus	17276	Santa Cruz do Sul, Rio Grande do Sul, Brazil.	0.049	2414	0.134	5.46448
Leptodactylus mystacinus	17276	Santa Cruz do Sul, Rio Grande do Sul, Brazil.	0.052	2414	0.136	5.31915
Leptodactylus mystacinus	17276	Santa Cruz do Sul, Rio Grande do Sul, Brazil.	0.052	2414	0.15	4.9505
Leptodactylus mystacinus	17276	Santa Cruz do Sul, Rio Grande do Sul, Brazil.	0.051	2414	0.162	4.69484
Leptodactylus mystacinus	17276	Santa Cruz do Sul, Rio Grande do Sul, Brazil.	0.052	2414	0.168	4.54545
Leptodactylus mystacinus	17276	Santa Cruz do Sul, Rio Grande do Sul, Brazil.	0.049	2414	0.17	4.56621
Leptodactylus mystacinus	21082	Bella Vista, Corrientes, Argentina.	0.045	1960	0.124	5.91716
Leptodactylus mystacinus	21082	Bella Vista, Corrientes, Argentina.	0.04	1960	0.129	5.91716
Leptodactylus mystacinus	21082	Bella Vista, Corrientes, Argentina.	0.041	1960	0.132	5.78035
Leptodactylus mystacinus	21082	Bella Vista, Corrientes, Argentina.	0.041	1965	0.129	5.88235
Leptodactylus mystacinus	21082	Bella Vista, Corrientes, Argentina.	0.044	1978	0.121	6.06061
Leptodactylus mystacinus	21082	Bella Vista, Corrientes, Argentina.	0.04	1978	0.127	5.98802
Leptodactylus mystacinus	21082	Bella Vista, Corrientes, Argentina.	0.042	1978	0.127	5.91716
Leptodactylus mystacinus	21082	Bella Vista, Corrientes, Argentina.	0.041	1978	0.128	5.91716
Leptodactylus mystacinus	21082	Bella Vista, Corrientes, Argentina.	0.039	1978	0.129	5.95238
Leptodactylus mystacinus	21082	Bella Vista, Corrientes, Argentina.	0.04	1978	0.129	5.91716
Leptodactylus mystacinus	21082	Bella Vista, Corrientes, Argentina.	0.045	1978	0.13	5.71429
Leptodactylus mystacinus	21082	Bella Vista, Corrientes, Argentina.	0.042	1978	0.132	5.74713
Leptodactylus mystacinus	21082	Bella Vista, Corrientes, Argentina.	0.04	1978	0.137	5.64972
Leptodactylus mystacinus	21082	Bella Vista, Corrientes, Argentina.	0.042	1978	0.14	5.49451
Leptodactylus mystacinus	21082	Bella Vista, Corrientes, Argentina.	0.039	1978	0.141	5.55556
Leptodactylus mystacinus	21082	Bella Vista, Corrientes, Argentina.	0.041	1978	0.145	5.37634
Leptodactylus mystacinus	21082	Bella Vista, Corrientes, Argentina.	0.042	1992	0.127	5.91716
Leptodactylus mystacinus	21082	Bella Vista, Corrientes, Argentina.	0.038	1995	0.094	7.57576
Leptodactylus mystacinus	21082	Bella Vista, Corrientes, Argentina.	0.041	1995	0.104	6.89655
Leptodactylus mystacinus	21082	Bella Vista, Corrientes, Argentina.	0.042	1995	0.121	6.13497
Leptodactylus mystacinus	21083	Bella Vista, Corrientes, Argentina.	0.041	1995	0.124	6.06061
Leptodactylus mystacinus	21083	Bella Vista, Corrientes, Argentina.	0.041	1995	0.136	5.64972
Leptodactylus mystacinus	21083	Bella Vista, Corrientes, Argentina.	0.041	1995	0.14	5.52486
Leptodactylus mystacinus	21083	Bella Vista, Corrientes, Argentina.	0.037	1995	0.143	5.55556
Leptodactylus mystacinus	21083	Bella Vista, Corrientes, Argentina.	0.037	1995	0.143	5.55556
Leptodactylus mystacinus	21083	Bella Vista, Corrientes, Argentina.	0.036	1995	0.144	5.55556
Leptodactylus mystacinus	21083	Bella Vista, Corrientes, Argentina.	0.037	2012	0.094	7.63359
Leptodactylus mystacinus	21083	Bella Vista, Corrientes, Argentina.	0.039	2012	0.094	7.5188
Leptodactylus mystacinus	21083	Bella Vista, Corrientes, Argentina.	0.039	2012	0.098	7.29927
Leptodactylus mystacinus	21083	Bella Vista, Corrientes, Argentina.	0.041	2012	0.1	7.0922
Leptodactylus mystacinus	21083	Bella Vista, Corrientes, Argentina.	0.04	2012	0.102	7.04225
Leptodactylus mystacinus	21083	Bella Vista, Corrientes, Argentina.	0.043	2012	0.125	5.95238
Leptodactylus mystacinus	21083	Bella Vista, Corrientes, Argentina.	0.04	2012	0.125	6.06061
Leptodactylus mystacinus	21083	Bella Vista, Corrientes, Argentina.	0.042	2012	0.126	5.95238
Leptodactylus mystacinus	21083	Bella Vista, Corrientes, Argentina.	0.043	2012	0.126	5.91716
Leptodactylus mystacinus	21083	Bella Vista, Corrientes, Argentina.	0.039	2012	0.126	6.06061
Leptodactylus mystacinus	21083	Bella Vista, Corrientes, Argentina.	0.041	2012	0.127	5.95238
Leptodactylus mystacinus	21083	Bella Vista, Corrientes, Argentina.	0.039	2012	0.128	5.98802
Leptodactylus mystacinus	21083	Bella Vista, Corrientes, Argentina.	0.042	2012	0.131	5.78035
Leptodactylus mystacinus	21083	Bella Vista, Corrientes, Argentina.	0.042	2012	0.132	5.74713
Leptodactylus mystacinus	21084	Bella Vista, Corrientes, Argentina.	0.04	2012	0.133	5.78035
Leptodactylus mystacinus	21084	Bella Vista, Corrientes, Argentina.	0.039	2012	0.134	5.78035
Leptodactylus mystacinus	21084	Bella Vista, Corrientes, Argentina.	0.037	2012	0.134	5.84795
Leptodactylus mystacinus	21084	Bella Vista, Corrientes, Argentina.	0.04	2012	0.139	5.58659
Leptodactylus mystacinus	21084	Bella Vista, Corrientes, Argentina.	0.038	2012	0.147	5.40541
Leptodactylus mystacinus	21084	Bella Vista, Corrientes, Argentina.	0.038	2012	0.147	5.40541
Leptodactylus mystacinus	21084	Bella Vista, Corrientes, Argentina.	0.037	2012	0.148	5.40541
Leptodactylus mystacinus	21084	Bella Vista, Corrientes, Argentina.	0.044	2012	0.15	5.15464
Leptodactylus mystacinus	21084	Bella Vista, Corrientes, Argentina.	0.041	2012	0.151	5.20833
Leptodactylus mystacinus	21084	Bella Vista, Corrientes, Argentina.	0.04	2030	0.128	5.95238
Leptodactylus mystacinus	21084	Bella Vista, Corrientes, Argentina.	0.038	2668	0.084	8.19672
Leptodactylus mystacinus	21084	Bella Vista, Corrientes, Argentina.	0.037	2693	0.085	8.19672
Leptodactylus mystacinus	21084	Bella Vista, Corrientes, Argentina.	0.037	2693	0.085	8.19672
Leptodactylus mystacinus	21084	Bella Vista, Corrientes, Argentina.	0.038	2718	0.087	8
Leptodactylus mystacinus	21084	Bella Vista, Corrientes, Argentina.	0.038	2718	0.087	8
Leptodactylus mystacinus	21084	Bella Vista, Corrientes, Argentina.	0.033	2744	0.088	8.26446
Leptodactylus mystacinus	21084	Bella Vista, Corrientes, Argentina.	0.035	2744	0.088	8.13008
Leptodactylus mystacinus	21084	Bella Vista, Corrientes, Argentina.	0.031	2744	0.088	8.40336
Leptodactylus mystacinus	21084	Bella Vista, Corrientes, Argentina.	0.032	2744	0.088	8.33333
Leptodactylus mystacinus	21084	Bella Vista, Corrientes, Argentina.	0.037	2744	0.089	7.93651
Leptodactylus mystacinus	21085	Bella Vista, Corrientes, Argentina.	0.032	2744	0.089	8.26446
Leptodactylus mystacinus	21085	Bella Vista, Corrientes, Argentina.	0.031	2766	0.089	8.33333
Leptodactylus mystacinus	21085	Bella Vista, Corrientes, Argentina.	0.047	2766	0.089	7.35294
Leptodactylus mystacinus	21085	Bella Vista, Corrientes, Argentina.	0.033	2769	0.089	8.19672
Leptodactylus mystacinus	21085	Bella Vista, Corrientes, Argentina.	0.04	2785	0.09	7.69231
Leptodactylus mystacinus	21085	Bella Vista, Corrientes, Argentina.	0.032	2791	0.09	8.19672
Leptodactylus mystacinus	21085	Bella Vista, Corrientes, Argentina.	0.033	2795	0.09	8.13008
Leptodactylus mystacinus	21085	Bella Vista, Corrientes, Argentina.	0.037	2795	0.091	7.8125
Leptodactylus mystacinus	21085	Bella Vista, Corrientes, Argentina.	0.033	2795	0.091	8.06452
Leptodactylus mystacinus	21085	Bella Vista, Corrientes, Argentina.	0.034	2795	0.092	7.93651
Leptodactylus mystacinus	21085	Bella Vista, Corrientes, Argentina.	0.036	2795	0.092	7.8125
Leptodactylus mystacinus	21085	Bella Vista, Corrientes, Argentina.	0.035	2795	0.093	7.8125
Leptodactylus mystacinus	21085	Bella Vista, Corrientes, Argentina.	0.035	2795	0.093	7.8125
Leptodactylus mystacinus	21085	Bella Vista, Corrientes, Argentina.	0.035	2821	0.153	5.31915
Leptodactylus mystacinus	21085	Bella Vista, Corrientes, Argentina.	0.038	2821	0.154	5.20833
Leptodactylus mystacinus	21085	Bella Vista, Corrientes, Argentina.	0.031	2821	0.154	5.40541
Leptodactylus mystacinus	21085	Bella Vista, Corrientes, Argentina.	0.033	2821	0.154	5.34759
Leptodactylus mystacinus	21085	Bella Vista, Corrientes, Argentina.	0.033	2821	0.156	5.29101
Leptodactylus mystacinus	21085	Bella Vista, Corrientes, Argentina.	0.031	2821	0.156	5.34759
Leptodactylus mystacinus	21085	Bella Vista, Corrientes, Argentina.	0.036	2821	0.162	5.05051
Leptodactylus mystacinus	17689	Seará, Santa Catarina, Brazil.	0.039	2442	0.121	6.25
Leptodactylus mystacinus	17689	Seará, Santa Catarina, Brazil.	0.039	2410	0.108	6.80272
Leptodactylus mystacinus	17689	Seará, Santa Catarina, Brazil.	0.04	2410	0.102	7.04225
Leptodactylus mystacinus	17689	Seará, Santa Catarina, Brazil.	0.041	2410	0.099	7.14286
Leptodactylus mystacinus	17689	Seará, Santa Catarina, Brazil.	0.042	2410	0.101	6.99301
Leptodactylus mystacinus	17689	Seará, Santa Catarina, Brazil.	0.042	2410	0.088	7.69231
Leptodactylus mystacinus	17689	Seará, Santa Catarina, Brazil.	0.043	2455	0.094	7.29927
Leptodactylus mystacinus	17689	Seará, Santa Catarina, Brazil.	0.043	2455	0.115	6.32911
Leptodactylus mystacinus	17689	Seará, Santa Catarina, Brazil.	0.043	2432	0.091	7.46269
Leptodactylus mystacinus	17689	Seará, Santa Catarina, Brazil.	0.044	2455	0.092	7.35294
Leptodactylus mystacinus	17689	Seará, Santa Catarina, Brazil.	0.044	2432	0.095	7.19424
Leptodactylus mystacinus	17689	Seará, Santa Catarina, Brazil.	0.046	2455	0.112	6.32911
Leptodactylus mystacinus	17689	Seará, Santa Catarina, Brazil.	0.052	2432	0.125	5.64972
Leptodactylus mystacinus	17689	Seará, Santa Catarina, Brazil.	0.057	2432	0.098	6.45161
Leptodactylus mystacinus	17689	Seará, Santa Catarina, Brazil.	0.059	2455	0.105	6.09756
Leptodactylus mystacinus	17689	Seará, Santa Catarina, Brazil.	0.06	2410	0.101	6.21118
Leptodactylus mystacinus	17689	Seará, Santa Catarina, Brazil.	0.06	2455	0.1	6.25
Leptodactylus mystacinus	17689	Seará, Santa Catarina, Brazil.	0.06	2432	0.137	5.07614
Leptodactylus mystacinus	17689	Seará, Santa Catarina, Brazil.	0.063	2432	0.149	4.71698
Leptodactylus mystacinus	MNVOC031	Catas Altas, Minas Gerais, Brazil.	0.048	2432	0.109	6.36943
Leptodactylus mystacinus	MNVOC031	Catas Altas, Minas Gerais, Brazil.	0.044	2410	0.111	6.45161
Leptodactylus mystacinus	MNVOC031	Catas Altas, Minas Gerais, Brazil.	0.044	2410	0.114	6.32911
Leptodactylus mystacinus	MNVOC031	Catas Altas, Minas Gerais, Brazil.	0.044	2410	0.115	6.28931
Leptodactylus mystacinus	MNVOC031	Catas Altas, Minas Gerais, Brazil.	0.044	2410	0.115	6.28931
Leptodactylus mystacinus	MNVOC031	Catas Altas, Minas Gerais, Brazil.	0.046	2410	0.115	6.21118
Leptodactylus mystacinus	MNVOC031	Catas Altas, Minas Gerais, Brazil.	0.048	2432	0.115	6.13497
Leptodactylus mystacinus	MNVOC031	Catas Altas, Minas Gerais, Brazil.	0.044	2410	0.116	6.25
Leptodactylus mystacinus	MNVOC031	Catas Altas, Minas Gerais, Brazil.	0.044	2410	0.117	6.21118
Leptodactylus mystacinus	MNVOC031	Catas Altas, Minas Gerais, Brazil.	0.047	2410	0.117	6.09756
Leptodactylus mystacinus	MNVOC031	Catas Altas, Minas Gerais, Brazil.	0.044	2410	0.118	6.17284
Leptodactylus mystacinus	MNVOC031	Catas Altas, Minas Gerais, Brazil.	0.048	2432	0.118	6.0241
Leptodactylus mystacinus	MNVOC031	Catas Altas, Minas Gerais, Brazil.	0.049	2432	0.118	5.98802
Leptodactylus mystacinus	MNVOC031	Catas Altas, Minas Gerais, Brazil.	0.045	2410	0.119	6.09756
Leptodactylus mystacinus	MNVOC031	Catas Altas, Minas Gerais, Brazil.	0.05	2455	0.119	5.91716
Leptodactylus mystacinus	MNVOC031	Catas Altas, Minas Gerais, Brazil.	0.042	2388	0.121	6.13497
Leptodactylus mystacinus	MNVOC031	Catas Altas, Minas Gerais, Brazil.	0.046	2410	0.121	5.98802
Leptodactylus mystacinus	MNVOC031	Catas Altas, Minas Gerais, Brazil.	0.048	2432	0.121	5.91716
Leptodactylus mystacinus	MNVOC031	Catas Altas, Minas Gerais, Brazil.	0.048	2432	0.121	5.91716
Leptodactylus mystacinus	MNVOC031	Catas Altas, Minas Gerais, Brazil.	0.045	2410	0.122	5.98802
Leptodactylus mystacinus	MNVOC031	Catas Altas, Minas Gerais, Brazil.	0.047	2410	0.122	5.91716
Leptodactylus mystacinus	MNVOC031	Catas Altas, Minas Gerais, Brazil.	0.049	2432	0.122	5.84795
Leptodactylus mystacinus	MNVOC031	Catas Altas, Minas Gerais, Brazil.	0.045	2410	0.123	5.95238
Leptodactylus mystacinus	MNVOC031	Catas Altas, Minas Gerais, Brazil.	0.045	2410	0.123	5.95238
Leptodactylus mystacinus	MNVOC031	Catas Altas, Minas Gerais, Brazil.	0.046	2410	0.123	5.91716
Leptodactylus mystacinus	MNVOC031	Catas Altas, Minas Gerais, Brazil.	0.047	2410	0.123	5.88235
Leptodactylus mystacinus	MNVOC031	Catas Altas, Minas Gerais, Brazil.	0.047	2410	0.123	5.88235
Leptodactylus mystacinus	MNVOC031	Catas Altas, Minas Gerais, Brazil.	0.048	2432	0.124	5.81395
Leptodactylus mystacinus	MNVOC031	Catas Altas, Minas Gerais, Brazil.	0.048	2432	0.124	5.81395
Leptodactylus mystacinus	MNVOC046-05	Pirenópolis, Goiás, Brazil.	0.052	2455	0.125	5.64972
Leptodactylus mystacinus	MNVOC046-05	Pirenópolis, Goiás, Brazil.	0.051	2455	0.126	5.64972
Leptodactylus mystacinus	MNVOC046-05	Pirenópolis, Goiás, Brazil.	0.043	2388	0.127	5.88235
Leptodactylus mystacinus	MNVOC046-05	Pirenópolis, Goiás, Brazil.	0.045	2410	0.127	5.81395
Leptodactylus mystacinus	MNVOC046-05	Pirenópolis, Goiás, Brazil.	0.046	2410	0.127	5.78035
Leptodactylus mystacinus	MNVOC046-05	Pirenópolis, Goiás, Brazil.	0.048	2432	0.127	5.71429
Leptodactylus mystacinus	MNVOC046-05	Pirenópolis, Goiás, Brazil.	0.044	2388	0.129	5.78035
Leptodactylus mystacinus	MNVOC046-05	Pirenópolis, Goiás, Brazil.	0.045	2410	0.129	5.74713
Leptodactylus mystacinus	MNVOC046-05	Pirenópolis, Goiás, Brazil.	0.046	2410	0.129	5.71429
Leptodactylus mystacinus	MNVOC046-05	Pirenópolis, Goiás, Brazil.	0.046	2410	0.131	5.64972
Leptodactylus mystacinus	MNVOC046-05	Pirenópolis, Goiás, Brazil.	0.046	2410	0.132	5.61798
Leptodactylus mystacinus	MNVOC046-05	Pirenópolis, Goiás, Brazil.	0.046	2410	0.136	5.49451
Leptodactylus mystacinus	MNVOC046-05	Pirenópolis, Goiás, Brazil.	0.052	2478	0.148	5
Leptodactylus mystacinus	MNVOC046-05	Pirenópolis, Goiás, Brazil.	0.054	2478	0.148	4.9505
Leptodactylus mystacinus	MNVOC046-05	Pirenópolis, Goiás, Brazil.	0.047	2414	0.15	5.07614
Leptodactylus mystacinus	MNVOC046-05	Pirenópolis, Goiás, Brazil.	0.049	2435	0.151	5
Leptodactylus mystacinus	MNVOC046-05	Pirenópolis, Goiás, Brazil.	0.054	2478	0.153	4.83092
Leptodactylus mystacinus	MNVOC046-05	Pirenópolis, Goiás, Brazil.	0.049	2435	0.158	4.83092
Leptodactylus mystacinus	MNVOC046-05	Pirenópolis, Goiás, Brazil.	0.052	2478	0.162	4.6729
Leptodactylus mystacinus	MNVOC046-05	Pirenópolis, Goiás, Brazil.	0.052	2478	0.167	4.56621
Leptodactylus mystacinus	MNVOC046-05	Pirenópolis, Goiás, Brazil.	0.047	2414	0.17	4.60829
Leptodactylus mystacinus	MNVOC046-07	Pirenópolis, Goiás, Brazil.	0.052	2292	0.101	6.53595
Leptodactylus mystacinus	MNVOC046-07	Pirenópolis, Goiás, Brazil.	0.049	2292	0.106	6.45161
Leptodactylus mystacinus	MNVOC046-07	Pirenópolis, Goiás, Brazil.	0.054	2292	0.108	6.17284
Leptodactylus mystacinus	MNVOC046-07	Pirenópolis, Goiás, Brazil.	0.051	2292	0.11	6.21118
Leptodactylus mystacinus	MNVOC046-07	Pirenópolis, Goiás, Brazil.	0.051	2292	0.111	6.17284
Leptodactylus mystacinus	MNVOC046-07	Pirenópolis, Goiás, Brazil.	0.049	2292	0.111	6.25
Leptodactylus mystacinus	MNVOC046-07	Pirenópolis, Goiás, Brazil.	0.044	2292	0.115	6.28931
Leptodactylus mystacinus	MNVOC046-07	Pirenópolis, Goiás, Brazil.	0.049	2292	0.116	6.06061
Leptodactylus mystacinus	MNVOC046-07	Pirenópolis, Goiás, Brazil.	0.044	2292	0.118	6.17284
Leptodactylus mystacinus	MNVOC046-07	Pirenópolis, Goiás, Brazil.	0.044	2292	0.118	6.17284
Leptodactylus mystacinus	MNVOC046-07	Pirenópolis, Goiás, Brazil.	0.056	2292	0.12	5.68182
Leptodactylus mystacinus	MNVOC046-07	Pirenópolis, Goiás, Brazil.	0.046	2292	0.15	5.10204
Leptodactylus mystacinus	MNVOC046-07	Pirenópolis, Goiás, Brazil.	0.053	2388	0.11	6.13497
Leptodactylus mystacinus	MNVOC046-07	Pirenópolis, Goiás, Brazil.	0.055	2322	0.11	6.06061
Leptodactylus mystacinus	MNVOC046-07	Pirenópolis, Goiás, Brazil.	0.054	2322	0.113	5.98802
Leptodactylus mystacinus	MNVOC046-07	Pirenópolis, Goiás, Brazil.	0.051	2366	0.113	6.09756
Leptodactylus mystacinus	MNVOC046-07	Pirenópolis, Goiás, Brazil.	0.052	2388	0.121	5.78035
Leptodactylus mystacinus	MNVOC046-07	Pirenópolis, Goiás, Brazil.	0.056	2322	0.122	5.61798
Leptodactylus mystacinus	MNVOC046-07	Pirenópolis, Goiás, Brazil.	0.05	2410	0.123	5.78035
Leptodactylus mystacinus	MNVOC046-07	Pirenópolis, Goiás, Brazil.	0.054	2388	0.127	5.52486
Leptodactylus mystacinus	MNVOC046-07	Pirenópolis, Goiás, Brazil.	0.046	2366	0.128	5.74713
Leptodactylus mystacinus	MNVOC046-07	Pirenópolis, Goiás, Brazil.	0.046	2388	0.129	5.71429
