# Supplementary material for: A new frog of the Leptodactylus fuscus species group (Anura: Leptodactylidae), endemic from the South American Gran Chaco
Source: PeerJ. 2019 Oct 11;7:e7869. doi: 10.7717/peerj.7869 (PMC6791353; doi:10.7717/peerj.7869)
Supplement: Supplemental Information 11 [file peerj-07-7869-s011.xlsx]

## Sheet: males
Species	Voucher	Locality	Sex	SVL	HL	HW	ED	TYD	END	IND	IOD	FAL	HDL	THL	TL	TSL	FL
Leptodactylus apepyta sp. nov.	MACN 45796	Ingeniero Juarez; Formosa; Argentina	Male	47.23	16.11	18.21	5.13	3.53	4.35	3.52	2.79	9.01	11.34	20.69	20.86	10.81	21.21
Leptodactylus apepyta sp. nov.	MACN 24020	Santa Sylvina; Chaco; Argentina	Male	48.59	17.08	16.51	3.67	3.54	4.24	3.12	NA	10.35	10.91	16.09	19.86	10.84	19.24
Leptodactylus apepyta sp. nov.	CENAI 9878	Hickman; Salta; Argentina	Male	40.76	14.96	15.25	4.68	1.41	3.89	2.9	2.87	6.97	9.95	15.76	17.21	9.83	19.26
Leptodactylus apepyta sp. nov.	CENAI 2125	Loreto; Santiago del Estero; Argentina	Male	46.2	16.36	16.88	5.23	3.08	4.2	3.19	3.45	8.43	10.95	18.85	19.64	11.56	20.35
Leptodactylus apepyta sp. nov.	CENAI 2126	Loreto; Santiago del Estero; Argentina	Male	44.54	16.27	16.58	4.99	3.48	3.81	2.92	2.87	8.37	9.8	17.9	18.62	9.79	19.27
Leptodactylus apepyta sp. nov.	IIBP 1738	Estancia Aguada Siete; Boquerón ; Paraguay	Male	59.89	20.1	22.06	6.28	4.2	4.61	3.78	4.08	9.57	13.82	24.59	24.49	13.6	24.71
Leptodactylus apepyta sp. nov.	IIBP 2949	Distrito Dr. Pedro P. Peña; Boquerón; Paraguay	Male	59.08	20.61	21.59	6.1	4.17	4.26	3.79	3.97	12.45	13.11	25.2	25.47	13.27	24.54
Leptodactylus apepyta sp. nov.	IIBP 2848	Distrito Dr. Pedro P. Peña; Boquerón; Paraguay	Male	61.41	21.63	23.46	6.28	3.75	4.91	4.05	4.24	11.51	14.02	25.14	25.11	14.2	25.22
Leptodactylus apepyta sp. nov.	IIBP 0728	Ruta Concepción-Pozo Colorado; Presidente Hayes; Paraguay	Male	60.45	19.99	22.42	5.14	3.83	4.9	3.26	4.04	11.05	13.23	24.59	23.38	13.47	22.92
Leptodactylus apepyta sp. nov.	IIBP 0729	Ruta Concepción-Pozo Colorado; Presidente Hayes; Paraguay	Male	58.34	20.36	21.59	5.76	4.04	5.11	4.16	2.84	10.49	12.62	22.77	23.77	13.55	22.99
Leptodactylus apepyta sp. nov.	LGE 11231	Zapla; Jujuy; Argentina	Male	59.41	18.95	20.13	5.28	3.83	4.76	3.93	3.71	10.55	13.24	25.17	24.53	12.98	24.24
Leptodactylus apepyta sp. nov.	LGE 11232	Zapla; Jujuy; Argentina	Male	59.44	16.83	21.79	5.88	3.63	5.05	4.64	3.04	10.55	13.21	24.31	23.58	13.92	24.27
Leptodactylus apepyta sp. nov.	LGE 11233	Zapla; Jujuy; Argentina	Male	54.69	17.36	18.18	4.51	3.8	4.72	3.45	3.78	9.5	11.12	21.67	21.93	12.33	21.58
Leptodactylus apepyta sp. nov.	LGE 11538	Zapla; Jujuy; Argentina	Male	43.01	15.38	16.7	4.36	3.08	4.52	3.3	2.81	8.47	10.03	17.86	18.43	10.63	19.81
Leptodactylus apepyta sp. nov.	LGE 00122	Tafí Viejo; Tucumán; Argentina	Male	51.25	18.9	20.09	5.57	3.98	4.85	3.49	3.06	9.25	12.27	24.78	22.78	11.89	20.29
Leptodactylus apepyta sp. nov.	LGE 12290	27.8 km SE Nueva Pompeya; Chaco; Argentina	Male	54.39	18.27	19.33	5.68	4.15	3.64	3.46	3.34	9.81	12.38	22.83	21.33	11.97	21.5
Leptodactylus apepyta sp. nov.	LGE 12298	27.5 km SE Nueva Pompeya; Chaco; Argentina	Male	56.57	18.92	20.16	4.86	3.4	4.46	3.55	4.23	9.82	12.35	22.12	21.15	11.27	22.04
Leptodactylus apepyta sp. nov.	LGE 15214	Los Colorados; Salta; Argentina	Male	56.88	18.15	20.43	6.07	4.03	4.38	3.91	3.34	9.58	13.39	NA	21.38	14.12	23.75
Leptodactylus apepyta sp. nov.	LGE 15227	4 km NE Wichi; Chaco; Argentina	Male	52.89	19.5	21.3	5.71	3.79	4.7	4.16	3.38	8.4	13.95	22.37	23.83	13.52	23.03
Leptodactylus apepyta sp. nov.	LGE 15232	31 km NE Fuerte Esperanza; Chaco; Argentina	Male	46.46	17.82	18.87	4.54	3.48	5.15	3.81	3.47	9.88	10.75	19.36	19.92	12.08	21.42
Leptodactylus apepyta sp. nov.	LGE 15236	32 km SE Comandancia Frías; Chaco; Argentina	Male	60.67	20.3	22.73	6.76	3.99	5.08	4.36	4.54	10.83	13.63	24.99	23.41	15.05	24.22
Leptodactylus apepyta sp. nov.	LGE 15238	3 km N Embarcación; Salta; Argentina	Male	59.5	19.56	21.43	6.89	4.07	4.39	4.24	3.13	8.96	13.25	24.8	24.35	13.57	23.71
Leptodactylus apepyta sp. nov.	LGE 15241	Laprida; Santiago del Estero; Argentina	Male	56.11	16.64	20.25	4.7	3.52	5.15	4.3	4.4	9.65	12.75	20.62	23.43	12.74	23.26
Leptodactylus apepyta sp. nov.	LGE 15248	San Pablo, El Ceibal; Tucumán; Argentina	Male	46.8	15.31	16.58	4.45	3.9	4.45	3.33	3.45	7.74	11.8	NA	19.22	10.78	20.95
Leptodactylus apepyta sp. nov.	LGE 15249	San Pablo, El Ceibal; Tucumán; Argentina	Male	52.62	18.51	21.18	6.18	3.76	4.62	3.46	4.01	9.44	12.51	21.18	22.1	12.81	22.17
Leptodactylus apepyta sp. nov.	LGE 15250	3,5 km SE El Pintado; Chaco; Argentina	Male	51.85	19.99	21.73	5.7	4.22	5.13	4.21	4	9.53	13.47	25.66	23.66	13.36	24.23
Leptodactylus apepyta sp. nov.	LGE 15251	3,5 km SE El Pintado; Chaco; Argentina	Male	53.18	18.96	20.88	5.95	4.1	4.79	3.62	4.01	9.53	11.76	23.03	22.44	12.66	22.85
Leptodactylus apepyta sp. nov.	LGE 15268	Laprida; Santiago del Estero; Argentina	Male	58.65	18.33	21.13	6.18	3.78	5.02	4.03	4.39	9.75	12.99	22.79	23.13	14.42	22.75
Leptodactylus apepyta sp. nov.	LGE 15272	4 km NE Wichi; Chaco; Argentina	Male	50.35	17.98	20.19	5.43	3.64	5.36	4.28	4.14	9.1	12.81	22.81	22.91	13.84	22.74
Leptodactylus apepyta sp. nov.	LGE 15274	4 km NE Wichi; Chaco; Argentina	Male	52.4	18.02	21.51	5.83	4.02	4.55	3.72	4.31	9.96	13.39	23.94	22.99	12.81	23.77
Leptodactylus apepyta sp. nov.	LGE 15275	5 km NE Misión Nueva Pompeya; Chaco; Argentina	Male	57.36	19.02	20.74	7.11	3.88	5.03	4.41	4.19	11.22	12.5	23.87	23.16	15.43	22.77
Leptodactylus apepyta sp. nov.	LGE 15276	3,5 km SE El Pintado; Chaco; Argentina	Male	51.34	17.78	21.99	6.08	3.95	5.84	4.39	4.93	11.29	12.26	24.56	23.96	14	23.42
Leptodactylus apepyta sp. nov.	LGE 15279	4 km NE Wichi; Chaco; Argentina	Male	56.59	19.32	22.4	6.4	3.94	5.08	4.09	4.05	10.8	13.09	24.17	24.44	14.98	23.75
Leptodactylus apepyta sp. nov.	LGE 15280	5 km NE Misión Nueva Pompeya; Chaco; Argentina	Male	56.21	18.92	20.3	5.91	3.66	4.44	3.66	3.66	9.27	13.08	22.43	23	12.48	22.02
Leptodactylus apepyta sp. nov.	LGE 16944	5 km NE Misión Nueva Pompeya; Chaco; Argentina	Male	54.83	18.72	20.74	5.62	4.03	4.36	4.19	3.72	9.93	12.62	23.53	22.33	12.97	22.58
Leptodactylus apepyta sp. nov.	LGE 08085	Las Lomitas; Formosa; Argentina	Male	58.5	18.87	20.28	5.42	3.73	5.02	4.07	3.9	9.18	13	22.33	20.52	13.16	21.39
Leptodactylus apepyta sp. nov.	LGE 08086	Las Lomitas; Formosa; Argentina	Male	52.84	18.15	20.6	6.11	3.77	4.92	4.28	4.71	8.33	12.55	22.44	21.71	12.67	21.38
Leptodactylus apepyta sp. nov.	LGE 08087	Las Lomitas; Formosa; Argentina	Male	51.26	17.65	19.64	5.75	3.99	4.5	3.33	4.38	9.11	11.92	23.31	21.7	12.84	20.91
Leptodactylus apepyta sp. nov.	LGE 08113	Las Lomitas; Formosa; Argentina	Male	55.26	18.33	20.79	6.32	3.87	4.83	4.52	4.4	9.83	12.98	22.9	21.73	12.36	21.13
Leptodactylus apepyta sp. nov.	LGE 08114	Las Lomitas; Formosa; Argentina	Male	52.31	17.62	19.68	5.73	4.02	4.77	3.9	3.56	8.72	12.35	20.86	21.41	11.96	21.06
Leptodactylus apepyta sp. nov.	LGE 08181	Laguna Yelma; Formosa; Argentina	Male	53.16	18.4	20.27	5.71	3.97	4.62	3.53	3.13	9	12.85	21.55	20.82	12.05	21.93
Leptodactylus apepyta sp. nov.	LGE 08384	La Loma; Santiago del Estero; Argentina	Male	55.65	17.74	19.94	5.01	3.11	4.37	3.16	3.21	9.38	12.18	23.74	21.32	13.3	21.44
Leptodactylus apepyta sp. nov.	LGE 09399	Colonia Villafañe; Formosa; Argentina	Male	53.31	17.75	19.13	5.69	3.81	4.63	3.38	3.93	9.21	12.73	21.59	22.04	12.37	21.48
Leptodactylus apepyta sp. nov.	MACN 45795	Ingeniero Juarez; Formosa; Argentina	Female	66.21	21.55	23.4	5.26	4.25	5.58	3.99	NA	11.02	13.15	NA	25.23	14.64	25.19
Leptodactylus apepyta sp. nov.	MACN 45794	Ingeniero Juarez; Formosa; Argentina	Female	58.34	20.72	21.81	6.73	4.32	5.18	4.21	NA	10.96	12.8	24.57	23.49	13.18	24.46
Leptodactylus apepyta sp. nov.	MACN 36093	Tartagal; Salta; Argentina	Female	61.28	21.54	22.63	5.64	4.22	4.74	4	4.48	11.61	13.67	21.29	26.52	13.68	24.9
Leptodactylus apepyta sp. nov.	IIBP 2308	Ruta La Patria-Infante Rivarola; Boquerón; Paraguay	Female	63.64	21.33	24.3	6.37	4.08	5.15	4.44	5.32	14.31	13.21	26.94	26.57	14.59	26.03
Leptodactylus apepyta sp. nov.	LGE 12095	21 km NE Misión Nueva Pompeya; Chaco; Argentina	Female	53.88	18.59	19.97	5.25	4.17	4.12	3.67	3.17	9.21	12.08	21.88	22.34	13.16	22.29
Leptodactylus apepyta sp. nov.	LGE 15240	Paraje El Colorado; Chaco; Argentina	Female	51.67	18.13	20.24	5.63	3.84	4.33	3.65	3.93	10.15	12.04	23.1	22.87	11.75	22.76
Leptodactylus mystacinus	CENAI 6597	Dos de Mayo ; Misiones; Argentina	Male	48.55	20.3	17.52	3.68	4.25	4.81	3.27	3.65	8.97	12.13	20.09	24.08	12.61	22.75
Leptodactylus mystacinus	CENAI 1319	Realico-Sta Rosa; La Pampa; Argentina	Male	50.18	18.11	18.81	4.54	3.72	4.41	3.5	3.54	9.31	11.68	21.13	20.87	11.64	21.5
Leptodactylus mystacinus	CENAI 2393	Felipe Yofré; Corrientes; Argentina	Male	50.3	19.49	16.99	5.43	3.89	5.17	3.5	3.38	9.71	11.28	20.79	21.37	11.73	21.51
Leptodactylus mystacinus	CENAI 2394	Felipe Yofré; Corrientes; Argentina	Male	48.13	18.36	17.1	4.42	3.91	4.57	3.21	3.17	10.16	9.92	20.3	21.5	12.41	21.13
Leptodactylus mystacinus	CENAI 3128	Arroyo Urquiza; Entre Rios; Argentina	Male	46	16.16	16.69	5.4	4	4.03	3.51	3.54	9.22	10.98	21.22	21.64	10.36	23.16
Leptodactylus mystacinus	CENAI 3588	Parque Siquiman; Cordoba; Argentina	Male	51.7	19.03	18.02	4.59	3.14	4.32	3.74	3.54	9.24	12.1	22.68	20.69	11.38	21.81
Leptodactylus mystacinus	CENAI 3851	Parque Siquiman; Cordoba; Argentina	Male	47.03	17.31	15.84	7.37	3.34	NA	3.58	3.45	8.44	9.53	20.17	18.63	10.84	19.52
Leptodactylus mystacinus	CENAI 4131	Cerro Colorado; Cordoba; Argentina	Male	49.92	17.51	16.25	5.14	3.32	3.81	2.51	3.05	7.83	9.81	21.7	20.99	11.14	18.17
Leptodactylus mystacinus	CENAI 4132	Cerro Colorado; Cordoba; Argentina	Male	51.56	16.7	15.41	4.48	3.36	3.94	3.19	2.99	8.02	9.89	13.22	18.99	10.52	16.59
Leptodactylus mystacinus	CENAI 4397	Parque Siquiman; Cordoba; Argentina	Male	51.56	15.5	15.79	4.32	3.7	4.17	3.25	3.66	9.92	12.2	18.19	17.84	9.77	17.51
Leptodactylus mystacinus	CENAI 4398	Parque Siquiman; Cordoba; Argentina	Male	51.56	17.46	16.49	4.64	3.7	4.01	3.12	3.14	8.32	10.72	20.34	20.75	10.27	21.07
Leptodactylus mystacinus	CENAI 6301	Cerro de Montevideo; montevideo; Uruguay	Male	48.58	17.6	16.85	4.88	4.23	4.2	4.19	3.56	11.26	12.45	22.05	22.46	12.12	23.19
Leptodactylus mystacinus	CENAI 6302	Salsipuedes; Rio Negro; Uruguay	Male	53.93	18.35	17.58	5.21	4.35	3.73	3.16	4.12	10.4	12.94	20.94	23.08	13.67	21.52
Leptodactylus mystacinus	CENAI 6498	Eldorado; Misiones; Argentina	Male	56.89	20.11	20.19	5.2	5.77	5.51	4.3	4.11	11.97	11.64	23.54	25.96	14.21	25.95
Leptodactylus mystacinus	CENAI 6592	Dos de Mayo; Misiones; Argentina	Male	53.35	22.67	18.67	5.75	4.61	5.07	3.75	3.54	10.49	12.75	22.06	24.26	13.37	22.46
Leptodactylus mystacinus	CENAI 6594	Dos de Mayo; Misiones; Argentina	Male	55.95	20.61	18.56	6.05	4.69	5.22	4.05	NA	9.37	12.12	20.68	23.75	13.37	22.88
Leptodactylus mystacinus	CENAI 6598	Dos de Mayo; Misiones; Argentina	Male	53.91	20.23	18.4	5.49	5.01	4.6	4.27	NA	10.29	11.7	20.05	23.16	12.44	23.29
Leptodactylus mystacinus	CENAI 6599	Dos de Mayo; Misiones; Argentina	Male	52.12	20.2	17.64	4.66	4.92	4.3	3.51	3.24	9.87	12.2	19.95	23.35	12.25	23.75
Leptodactylus mystacinus	CENAI 6600	Dos de Mayo; Misiones; Argentina	Male	52.3	20.79	17.9	5.55	4.51	5.03	3.87	3.34	10.8	11.46	20.26	23.1	13.64	23.29
Leptodactylus mystacinus	CENAI 6601	Dos de Mayo; Misiones; Argentina	Male	52.11	19.72	18.56	4.95	4.39	4.52	4.07	NA	9.56	11.87	21.28	22.66	13.41	22.79
Leptodactylus mystacinus	CENAI 6708	Bdo irigoyen; Misiones; Argentina	Male	48.22	20.1	17.89	5.12	5.11	4.37	3.81	3.58	8.76	12.74	21.21	22.75	12.26	23.14
Leptodactylus mystacinus	CENAI 6709	Bdo irigoyen; Misiones; Argentina	Male	54.56	23.38	18.65	5.04	5.08	4.59	4.59	NA	10.81	12.81	22.94	24.27	13.74	25.1
Leptodactylus mystacinus	CENAI 6711	Bdo irigoyen; Misiones; Argentina	Male	53.19	21.01	18.63	5.29	4.75	4.44	4.04	4.84	8.58	12.81	22.02	24.11	13.55	25.43
Leptodactylus mystacinus	CENAI 6712	Bdo irigoyen; Misiones; Argentina	Male	52.67	19.79	17.74	3.41	4.24	4.67	3.4	3.5	9.29	11.74	20.08	23.47	12.79	23.26
Leptodactylus mystacinus	CENAI 6713	Bdo irigoyen; Misiones; Argentina	Male	53.49	21.03	18.57	4.86	4.52	4.57	3.82	4.23	10.38	11.79	19.93	23.55	14.09	23.39
Leptodactylus mystacinus	CENAI 6715	Bdo irigoyen; Misiones; Argentina	Male	53.66	21.64	18.53	4.83	5.1	4.99	3.9	NA	9.96	12.04	20.19	23.61	12.81	24.32
Leptodactylus mystacinus	CENAI 6717	Bdo irigoyen; Misiones; Argentina	Male	51.25	21.55	17.86	5.16	4.19	4.98	3.53	3.36	8.73	12.13	19.41	23.31	12.97	22.36
Leptodactylus mystacinus	CENAI 7075	Gral Belgrano; Misiones; Argentina	Male	50.42	18.09	17.9	5.28	4.91	4.78	3.85	3.53	12.38	10.29	22.56	23.64	13.3	22.14
Leptodactylus mystacinus	CENAI 80-1	Santa Rosa de Calamuchita; Córdoba; Argentina	Male	52.74	19.99	16.9	5.61	4.49	4.77	3.88	3.36	9.08	11.84	18.49	21.18	10.85	20.73
Leptodactylus mystacinus	CENAI 80-2	Santa Rosa de Calamuchita; Córdoba; Argentina	Male	49.62	16.55	17.08	5.3	3.76	4.09	3.22	3.33	9.34	11.11	18.54	20.96	11.69	19.91
Leptodactylus mystacinus	CENAI 80-3	Santa Rosa de Calamuchita; Córdoba; Argentina	Male	52.7	17.48	16.74	5.64	3.8	4.61	3.39	3.23	9.84	10.61	15.78	23.17	11.85	NA
Leptodactylus mystacinus	CENAI 9876	Primavera; Alto Paraguay; Paraguay	Male	52.9	20	18.5	5.26	5.45	5.28	4.29	3.44	9.17	13.47	22.23	24.33	12.75	24.75
Leptodactylus mystacinus	CENAI S/N	Justo Daract; San Luis; Argentina	Male	48.96	18.89	18.48	5.03	4.06	3.77	3.69	3.66	8.4	12.23	20.92	23.12	12.77	22.97
Leptodactylus mystacinus	CFBH 00406	Botucatu; São Paulo; Brazil	Male	54.42	21.63	18.4	5.11	5	4.83	4.11	3.95	10.32	12.04	22.1	22.91	13.53	23.19
Leptodactylus mystacinus	CFBH 00999	Campinas; São Paulo; Brazil	Male	52.55	21.98	18.27	6.74	4.6	4.15	3.76	3.7	9.88	12.16	21.53	22.7	12.18	23.63
Leptodactylus mystacinus	CFBH 01000	Campinas; São Paulo; Brazil	Male	54.1	21.13	18.43	6.46	4.42	4.94	4.31	4.62	9.51	12.11	23.06	22.69	13.3	23.75
Leptodactylus mystacinus	CFBH 01339	Corumbataí; São Paulo; Brazil	Male	52.62	21.91	19.39	5.65	5.23	5.08	4.05	4	9	11.73	23.5	23.08	10.76	22.3
Leptodactylus mystacinus	CFBH 02499	Ribeirão Branco; São Paulo; Brazil	Male	49.32	21.13	18.05	5.15	4.63	5.04	3.67	3.7	9.26	11.4	21.99	22.31	13.05	22.91
Leptodactylus mystacinus	CFBH 03829	Piracicaba; São Paulo; Brazil	Male	53.76	21.57	18.16	5.49	4.71	4.3	4.31	4.31	10.46	12.04	21.42	24.32	13.21	23.1
Leptodactylus mystacinus	CFBH 06433	Rio Claro; São Paulo; Brazil	Male	53.4	19.86	18.94	5.86	4.47	3.86	3.72	3.1	8.64	12.27	21.32	22.65	12.46	22.87
Leptodactylus mystacinus	CFBH 06465	Rio Claro; São Paulo; Brazil	Male	53.98	21.57	18.38	5.43	4.24	4.81	3.76	4.81	10.11	12.81	22.04	22.81	12.69	24.01
Leptodactylus mystacinus	CFBH 06519	Itirapina; São Paulo; Brazil	Male	51.38	20.35	18.85	5.52	4.9	5.17	3.58	3.97	10.92	11.22	22.73	21.55	11.02	22.11
Leptodactylus mystacinus	CFBH 06959	Machadinho; Rio Grande do Sul; Brazil	Male	52.7	22.69	18.11	5.5	4.36	4.98	3.76	3.79	8.7	11.77	21.91	23.13	13.99	22.84
Leptodactylus mystacinus	CFBH 07129	Rio Claro; São Paulo; Brazil	Male	54.96	21.23	18.76	4.85	4.86	4.96	3.54	3.53	8.76	12.86	23.49	23.68	12.59	24.83
Leptodactylus mystacinus	CFBH 07130	Rio Claro; São Paulo; Brazil	Male	49.11	20.77	17.31	5.94	4.48	4.32	3.62	2.27	9.59	11.52	20.33	22.07	12.38	22.69
Leptodactylus mystacinus	CFBH 07615	Rio Claro; São Paulo; Brazil	Male	46.84	19.47	16.87	4.89	4.21	4.7	3.45	3.15	9.17	12.15	22.19	21.47	10.92	23.55
Leptodactylus mystacinus	CFBH 09535	Canela; Rio Grande do Sul; Brazil	Male	53.31	20.32	18.9	4.87	4.31	4.44	3.05	4.01	10.34	11.47	21.7	21.52	11.21	24.01
Leptodactylus mystacinus	CFBH 09536	Canela; Rio Grande do Sul; Brazil	Male	54.37	21.59	19.08	4.81	4.86	4.58	3.36	3.62	11.64	12.31	21.92	20.76	12.42	22.48
Leptodactylus mystacinus	CFBH 09787	Itirapina; São Paulo; Brazil	Male	57.92	23.16	19.21	5.45	5.56	5.22	4.4	NA	9.68	13.82	25.22	24.88	13.18	24.29
Leptodactylus mystacinus	CFBH 09788	Itirapina; São Paulo; Brazil	Male	55.04	23.26	18.06	5.24	4.96	4.77	3.83	3.62	8.83	11.6	22.82	23.07	11.59	22.27
Leptodactylus mystacinus	CFBH 09789	Itirapina; São Paulo; Brazil	Male	55.42	20.07	18.05	4.66	5.04	2.62	3.68	3.5	8.93	13.3	23.93	23.67	13.46	22.38
Leptodactylus mystacinus	CFBH 09790	itirapina; São Paulo; Brazil	Male	53.37	20.67	18.5	4.87	4.31	4.95	3.99	NA	9.04	12.72	22.21	22.87	13.3	24.62
Leptodactylus mystacinus	CFBH 09791	Itirapina; São Paulo; Brazil	Male	54.84	23.2	19.12	5.46	5.03	5.35	4.1	NA	9.97	13.99	25.05	23.34	12.78	23.18
Leptodactylus mystacinus	CFBH 09792	Itirapina; São Paulo; Brazil	Male	47.53	18.09	16.52	4.96	3.99	4.89	3.31	3.03	7.52	12.23	20.76	21.01	12.23	22.13
Leptodactylus mystacinus	CFBH 09793	Itirapina; São Paulo; Brazil	Male	52.76	22.41	17.19	5.24	4.41	4.71	4.16	3.77	8.96	11.09	22.38	22.77	12.35	22.93
Leptodactylus mystacinus	CFBH 09794	Itirapina; São Paulo; Brazil	Male	52.08	19.9	18.07	5.12	4.96	4.81	3.76	4.11	9.95	12.23	22.3	22.88	12.28	23.49
Leptodactylus mystacinus	CFBH 09795	Itirapina; São Paulo; Brazil	Male	55.64	20.74	18.73	4.81	4.98	5.43	4.23	NA	10.06	12.62	22.3	24.02	13.24	24.03
Leptodactylus mystacinus	CFBH 09796	Itirapina; São Paulo; Brazil	Male	54.96	19.54	17.6	5.76	5.12	5.68	3.99	4.44	8.83	13	23.39	23.16	13.36	24.26
Leptodactylus mystacinus	CFBH 09798	Itirapina; São Paulo; Brazil	Male	55.33	20.73	17.2	5.86	5.26	5.87	4.14	NA	9.43	12.68	22.64	22.89	13.06	24.09
Leptodactylus mystacinus	CFBH 09800	Itirapina; São Paulo; Brazil	Male	49.33	20.28	16.26	3.44	4.45	4.82	3.76	3.55	9.2	11.46	21.26	21.22	12.17	22.01
Leptodactylus mystacinus	CFBH 09801	Brotas; São Paulo; Brazil	Male	47.06	19.93	17.19	5.08	5.32	5.22	3.96	4.47	8.9	12.31	23.03	22.93	12.32	24.19
Leptodactylus mystacinus	CFBH 09802	Brotas; São Paulo; Brazil	Male	52.51	21.05	18.34	6.11	4.75	5.12	3.99	3.99	8.7	12.29	22.79	23.08	13.53	23.56
Leptodactylus mystacinus	CFBH 09811	Itirapina; São Paulo; Brazil	Male	53.19	22	17.24	5.61	5.02	5.02	3.8	3.57	9.08	12.1	21.31	23.5	13.03	23.68
Leptodactylus mystacinus	CFBH 09813	Itirapina; São Paulo; Brazil	Male	53.93	22.37	19.12	6.46	5.37	5.38	4.01	4.32	9.39	13.72	22.51	23.43	14.4	23.38
Leptodactylus mystacinus	CFBH 09814	Itirapina; São Paulo; Brazil	Male	55.36	21.02	17.72	5.5	4.78	4.81	4.02	4.1	9.54	11.96	22.34	23.3	12.12	23.69
Leptodactylus mystacinus	CFBH 09815	Itirapina; São Paulo; Brazil	Male	53.67	20.09	18.19	5.41	4.57	4.38	3.65	4.38	9.07	12.49	22.86	22.25	12.15	23.76
Leptodactylus mystacinus	CFBH 09816	Itirapina; São Paulo; Brazil	Male	54.96	20.12	18.56	5.34	4.71	5.03	4.1	4.62	9.17	12.87	23.78	23.4	12.62	23.07
Leptodactylus mystacinus	CFBH 09817	Itirapina; São Paulo; Brazil	Male	53.98	21.59	18.01	5.28	5.06	5.23	4.24	NA	9.96	12.69	24.15	23.32	12.81	24.17
Leptodactylus mystacinus	CFBH 09818	Itirapina; São Paulo; Brazil	Male	47.61	18.86	15.91	5.69	4.37	4.6	3.47	3.41	8.47	10.71	20.43	20.86	11.9	22.1
Leptodactylus mystacinus	CFBH 09819	Itirapina; São Paulo; Brazil	Male	53.88	21.19	19.14	5.68	5.54	5.17	4.57	3.98	9.4	13.88	24.94	24.08	12.55	23.06
Leptodactylus mystacinus	CFBH 09820	Itirapina; São Paulo; Brazil	Male	51.89	21.1	17.55	5.17	4.69	5.16	3.68	3.5	7.92	12.14	23.13	22.69	12.44	23.65
Leptodactylus mystacinus	CFBH 09832	Brotas; São Paulo; Brazil	Male	46.66	17.91	15.71	5.01	4.09	2.44	3.4	3.67	7.28	11.52	19.99	20.02	11.43	21.42
Leptodactylus mystacinus	CFBH 09833	Brotas; São Paulo; Brazil	Male	48.52	18.77	16.01	4.85	3.91	4.43	3.26	3.13	8.05	12.25	21.59	22.21	22.26	21.64
Leptodactylus mystacinus	CFBH 10083	Teodoro Sampaio; São Paulo; Brazil	Male	52.19	20.76	18	5.92	4.63	5.31	4.11	NA	9.55	12.53	22.96	23.07	12.63	24.92
Leptodactylus mystacinus	CFBH 10084	Teodoro Sampaio; São Paulo; Brazil	Male	48.07	21.29	17.22	5.54	3.98	4.94	3.62	3.45	8.93	11.83	21.36	21.24	11.33	21.85
Leptodactylus mystacinus	CFBH 10088	Teodoro Sampaio; São Paulo; Brazil	Male	54.33	21.38	19.25	6.19	4.69	5.23	4.11	4.83	9.56	12.79	23.21	22.7	11.34	25.39
Leptodactylus mystacinus	CFBH 10090	Teodoro Sampaio; São Paulo; Brazil	Male	54.48	21.9	20.95	5.89	5.05	3.08	4.23	4.04	8.65	13.49	24.1	24.24	13.57	26.74
Leptodactylus mystacinus	CFBH 10221	Grão Mogol; Minas Gerais; Brazil	Male	51.56	17.53	15.84	5.2	3.79	4.06	2.86	3.84	8.74	9.9	17.44	18.08	9.77	19.35
Leptodactylus mystacinus	CFBH 13596	Três Lagoas; Mato Grosso do Sul; Brazil	Male	54.96	22.24	18.51	5.8	4.8	5.34	3.76	3.56	9.47	12.24	22.66	24.06	12.17	23.88
Leptodactylus mystacinus	CFBH 17243	Maringá; Paraná; Brazil	Male	55.27	22.65	18.33	5.03	4.75	4.32	3.61	4.07	10.77	11.84	21.28	24.74	12.01	23.41
Leptodactylus mystacinus	CFBH 17244	Maringá; Paraná; Brazil	Male	55.51	19.71	18.49	5.73	4.41	5.56	2.37	4.16	10.51	12.08	21.11	24.74	13.82	24.69
Leptodactylus mystacinus	CFBH 18299	Teodoro Sampaio; São Paulo; Brazil	Male	51.03	20.27	16.96	5.6	4.48	4.33	3.65	3.48	10.42	11.37	21.58	20.81	10.58	23.56
Leptodactylus mystacinus	CFBH 18834	Assis; São Paulo; Brazil	Male	45.88	20.18	16.13	5.09	4.06	4.72	3.25	3.8	8.84	11.08	20.84	20.63	11.76	22.81
Leptodactylus mystacinus	CFBH 18860	Assis; São Paulo; Brazil	Male	52.22	21.42	17.23	5.17	4.36	5.06	3.62	2.96	10.12	11.53	23.15	22.72	13.53	22.43
Leptodactylus mystacinus	CFBH 19764	Bauru; São Paulo; Brazil	Male	57.97	22.59	19.88	6.13	4.8	5.01	3.83	4.29	11.39	12.54	24.54	23.76	14.14	24.42
Leptodactylus mystacinus	CFBH 19765	Bauru; São Paulo; Brazil	Male	58.63	21.67	19.3	5.48	4.85	4.53	4.02	NA	11.41	12.35	24.05	25.11	14.64	25.04
Leptodactylus mystacinus	CFBH 19766	Bauru; São Paulo; Brazil	Male	45.48	18.3	15.69	4.41	4.17	4.91	3.51	3.59	9.55	11.46	19.91	20.18	11.06	21.59
Leptodactylus mystacinus	CFBH 19767	Bauru; São Paulo; Brazil	Male	54.89	20.95	18.38	5.17	5.07	5.03	3.65	3.49	11.86	11.55	23.87	24.23	13.21	25
Leptodactylus mystacinus	CFBH 19768	Bauru; São Paulo; Brazil	Male	47.79	19.46	15.92	2.82	3.82	4.52	4.49	3.06	8.88	10.39	20.19	21.01	12.11	21.5
Leptodactylus mystacinus	CFBH 20060	Assis; São Paulo; Brazil	Male	48.78	18.72	17.62	5.01	4.16	5.25	3.79	4	10.85	11.52	22.29	21.85	12.06	22.3
Leptodactylus mystacinus	CFBH 20061	Assis; São Paulo; Brazil	Male	54.38	21.76	19.38	5.14	4.64	4.78	3.99	3.62	9.07	12.65	23.61	24.35	13.07	24.86
Leptodactylus mystacinus	CFBH 21084	Caetité; Bahía; Brazil	Male	49.79	20.3	17.9	4.92	4.22	4.74	3.61	3.36	8.55	12.43	23.54	21.66	12.98	20.54
Leptodactylus mystacinus	CFBH 23137	Angatuba; São Paulo; Brazil	Male	51.54	21.5	18.12	5.84	4.3	4.83	4.05	NA	9.2	11.48	21.81	22.35	11.28	22.68
Leptodactylus mystacinus	CFBH 23332	Tapiraí; São Paulo; Brazil	Male	53.48	19.45	17.09	4.44	5.08	4.67	4.03	NA	8.92	10.07	21.34	20.97	11.91	21.4
Leptodactylus mystacinus	CFBH 26430	Linhares; Espiritu Santo; Brazil	Male	52.47	20.94	19.49	6.47	4.26	5.17	3.51	4.41	11.08	12.99	23.79	23.78	12.95	24.96
Leptodactylus mystacinus	CFBH 26890	São Carlos; São Paulo; Brazil	Male	48.66	19.73	17.52	5.35	4.47	4.36	4.07	3.73	11.27	11.59	22.84	23.05	12.49	22.41
Leptodactylus mystacinus	CFBH 30126	palmeiras; Bahía; Brazil	Male	49.71	19.49	18.24	4.66	3.93	4.56	2.94	2.69	8.4	13.43	21.63	22.1	11.01	23.3
Leptodactylus mystacinus	CFBH 30189	Palmeiras; Bahía; Brazil	Male	48.37	18.54	17.93	3.84	3.69	2.82	2.99	3.5	8.74	11.95	21.32	21.72	11.94	22.2
Leptodactylus mystacinus	CFBH 32248	Jequié; Bahía; Brazil	Male	50.73	19.85	18.03	5.64	4.48	4.93	3.2	3.4	8.78	12.9	23.44	22.16	11.54	24.48
Leptodactylus mystacinus	CFBH 33098	Luis Antônio; São Paulo; Brazil	Male	53.09	20.67	18.29	5.21	4.64	5.39	3.51	3.46	10.28	12.05	23.63	23.13	12.81	24.91
Leptodactylus mystacinus	CFBH 33099	Luis Antônio; São Paulo; Brazil	Male	52.19	19.67	18.24	5.4	4.66	5.02	3.8	3.17	9.29	12.35	23.31	23.44	13.37	24.03
Leptodactylus mystacinus	CFBH 33100	Luis Antônio; São Paulo; Brazil	Male	45.38	17.55	16.03	4.92	3.9	4.58	3.35	3.13	8.74	10.96	22.53	22.79	12.71	23.61
Leptodactylus mystacinus	CFBH 33101	Luis Antônio; São Paulo; Brazil	Male	48.06	19.02	18.18	3.04	3.86	4.93	3.43	3.51	10.35	11.45	21.81	22.65	12.58	22.55
Leptodactylus mystacinus	CFBH 33102	Luis Antônio; São Paulo; Brazil	Male	53.17	20.81	18.07	5.43	4.62	4.4	3.54	3.59	9.52	11.74	23.08	23.87	13.13	24.71
Leptodactylus mystacinus	CFBH 33103	Luis Antônio; São Paulo; Brazil	Male	50.12	18.95	16.9	5.52	4.17	4.92	3.71	3.56	9.66	11.51	23.74	21.84	12.12	23.95
Leptodactylus mystacinus	CFBH 33105	Luis Antônio; São Paulo; Brazil	Male	52.98	19.61	18.31	3.7	4.43	4.71	3.71	3.52	10.4	11.22	22.6	22.16	12.98	23.61
Leptodactylus mystacinus	CFBH 33106	Luis Antônio; São Paulo; Brazil	Male	45.63	19.23	18.12	5.09	4.4	4.51	4	NA	8.78	12.48	22.24	22.13	12.35	21.06
Leptodactylus mystacinus	CFBH 33108	Luis Antônio; São Paulo; Brazil	Male	55.65	20.27	17.73	5.32	4.45	5.28	3.28	3.9	9.41	12.53	23.27	23.73	12.67	24.29
Leptodactylus mystacinus	CFBH 33111	Luis Antônio; São Paulo; Brazil	Male	52.61	20.36	16.65	5.16	4.15	4.51	4.03	NA	9.58	12.62	22.58	22.91	12.09	24.96
Leptodactylus mystacinus	CFBH 33112	Luis Antônio; São Paulo; Brazil	Male	57.98	20.63	18.85	4.96	4.55	5.06	4	3.43	11.37	12.28	25.05	25.05	13.37	25.37
Leptodactylus mystacinus	CFBH 33114	Luis Antônio; São Paulo; Brazil	Male	54.96	20.8	18.9	5.51	4.83	4.59	3.88	3.64	9.6	12.01	23.88	24.19	13.75	22.93
Leptodactylus mystacinus	CFBH 33115	Luis Antônio; São Paulo; Brazil	Male	48.84	19.82	17.68	5.32	4.09	5.13	3	3.26	9.68	11.83	23.06	21.71	12.45	23.79
Leptodactylus mystacinus	CFBH 33116	Luis Antônio; São Paulo; Brazil	Male	52.51	20.2	17.89	5.9	4.75	4.95	3.56	3.88	8.78	12.83	23.95	23.17	13.7	23.43
Leptodactylus mystacinus	CFBH 33117	Luis Antônio; São Paulo; Brazil	Male	49.35	19.06	16.61	5.15	4.43	4.85	3.92	4.4	9.21	10.97	23.21	22.42	12.57	22.05
Leptodactylus mystacinus	CFBH 33118	Luis Antônio; São Paulo; Brazil	Male	53.51	19.74	18.34	5.16	4.28	5.15	4	3.97	10.22	12.52	23.52	24.35	13.35	24.01
Leptodactylus mystacinus	CFBH 33554	Cristina; Minas Gerais; Brazil	Male	54.65	20.56	17.86	4.64	5.55	5.14	3.64	3.15	9.94	12.37	22.69	22.53	13.51	23.72
Leptodactylus mystacinus	CFBH 34585	itaitu; Bahía; Brazil	Male	49.83	19.19	18.19	5.47	3.96	4.03	3.94	4.56	8.33	12.63	21.83	21.8	11.74	23.18
Leptodactylus mystacinus	CFBH 34631	Miguel Calmon; Bahía; Brazil	Male	45.58	18.44	16.95	4.95	3.68	4.57	2.9	4.04	8.79	11.61	19.16	19.77	10.05	21.65
Leptodactylus mystacinus	CFBH 34632	Miguel Calmon; Bahía; Brazil	Male	50.04	19.52	17.32	4.66	4.09	4.59	3.21	3.48	8.6	11.93	20.66	21.29	11.52	23.29
Leptodactylus mystacinus	CFBH 34633	Miguel Calmon; Bahía; Brazil	Male	53.51	20.88	19.61	4.82	4.14	5.31	3.2	3.57	9.66	12.63	23.36	22.94	12.1	22.5
Leptodactylus mystacinus	CFBH 34947	Campinas; São Paulo; Brazil	Male	53.2	22.86	19.59	5.65	5.1	5.19	3.97	2.84	9.39	12.78	21.5	25.03	13.04	26.28
Leptodactylus mystacinus	CFBH 35037	campinas; São Paulo; Brazil	Male	51.51	20.71	17.81	6.45	4.83	4.44	4.07	3.82	9.38	11.82	21.99	22.73	11.45	21.87
Leptodactylus mystacinus	CFBH 35404	Campinas; São Paulo; Brazil	Male	52.62	19.94	18.25	6.19	4.21	4.15	3.46	3.74	8.9	12.38	23.08	23.32	13.39	22.81
Leptodactylus mystacinus	CFBH 35792	Piquete; São Paulo; Brazil	Male	56.33	22.08	19.15	6.58	4.87	5.01	3.79	4.01	10.04	12.12	22.98	23.9	12.58	23.41
Leptodactylus mystacinus	CFBH 36360	Botucatu; São Paulo; Brazil	Male	54.14	21.02	18.6	5.71	5	5.38	3.69	5	10.87	11.33	23.4	23.42	13.45	24.57
Leptodactylus mystacinus	CFBH 38243	Salvador do Sul; Rio Grande do Sul; Brazil	Male	51.74	21.33	18.92	5.45	3.65	4.5	3.36	3.89	10.53	11.97	20.36	21.3	12.39	23.03
Leptodactylus mystacinus	CFBH 38397	Assis; São Paulo; Brazil	Male	53.74	19.82	18.11	5.71	3.14	4.94	3.31	3.98	9.86	11.99	23.09	22.71	12.68	24
Leptodactylus mystacinus	CFBH 38543	Luís Antonio; São Paulo; Brazil	Male	52.5	21.3	17.53	5.7	5.03	4.6	3.97	4.07	8.61	12.07	23.89	23.02	13.15	23.5
Leptodactylus mystacinus	CFBH 39840	Santana do Riacho; Minas Gerais; Brazil	Male	54.33	22.03	19.14	6.8	4.65	5.04	3.74	4.51	8.36	13.38	23.89	22.82	12.57	25.45
Leptodactylus mystacinus	CFBH 42142	Macaé; Rio de Janeiro; Brazil	Male	56.45	21.16	20.12	5.81	4.55	5.04	3.52	3.58	10.45	11.42	22.48	21.78	12.93	24.79
Leptodactylus mystacinus	IIBP 0072	Reserva Mbaracayú; Canindeyú; Paraguay	Male	54.35	18.81	19.15	5.46	4.4	4.66	3.85	3.65	10.31	12.81	23.67	23.42	13.7	24.76
Leptodactylus mystacinus	IIBP 0254	San Lorenzo, UNA, Facultad de Veterinaria; Central ; Paraguay	Male	49.56	17.06	18.07	5.41	4	4.41	4.08	3.4	8.91	10.7	19.62	21.22	11.61	22.05
Leptodactylus mystacinus	IIBP 1085	Estancia Pirá Potrero (Vierci); Amambay ; Paraguay	Male	58.63	19.96	20.46	5.99	4.84	4.8	4.32	3.62	11.11	13.47	23.25	24.95	13.98	25.13
Leptodactylus mystacinus	IIBP 1086	Estancia Pirá Potrero (Vierci); Amambay ; Paraguay	Male	57.95	19.46	18.98	5.96	4.24	4.33	3.98	3.01	9.07	12.81	23.02	24.21	12.84	20.79
Leptodactylus mystacinus	IIBP 1185	Yatai; Itapua ; Paraguay	Male	53.8	17.85	19.58	6.09	5.09	4.36	4.16	3.84	9.09	12.92	23.59	24.14	13.72	25.48
Leptodactylus mystacinus	IIBP 1394	Parque Nacional San Rafael; Itapua ; Paraguay	Male	53.55	19.52	19.88	7.12	4.94	4.71	4.17	3.72	9.79	13.22	24.05	24.49	13.16	24.86
Leptodactylus mystacinus	IIBP 1999	Reserva Guyrá-Retá ; Itapua ; Paraguay	Male	51.78	18.94	18.9	5.25	4.82	4.63	3.84	3.96	9.19	13.19	22.26	24.74	13.24	25.15
Leptodactylus mystacinus	LGE 00014	Posadas; Misiones; Argentina	Male	46.68	16.85	16.05	4.71	4.37	4.49	3.41	2.82	7.51	11.46	19.79	20.58	11.96	21.59
Leptodactylus mystacinus	LGE 00264	PP El Piñalito; Misiones; Argentina	Male	52.34	17.92	18.74	5.36	5.02	5.64	4.14	4.15	9.4	12.98	24.28	24.67	12.84	23.49
Leptodactylus mystacinus	LGE 00265	PP El Piñalito; Misiones; Argentina	Male	56.19	18.01	19.34	5	5.3	4.84	4.04	3.94	8.64	13.43	24.74	25.17	13.77	24.94
Leptodactylus mystacinus	LGE 00418	Río Tercero; Córdoba; Argentina	Male	49.1	16.23	17.16	4.17	3.56	4.44	3.62	3.48	8.57	11.49	19.88	20.65	11.29	21.45
Leptodactylus mystacinus	LGE 01542	PP El Palmar; Entre Rios; Argentina	Male	51.56	19.44	18.56	4.04	3.25	3.52	3.72	2.91	NA	9.41	15.78	16.96	9.77	18
Leptodactylus mystacinus	LGE 01565	San Ignacio; Misiones; Argentina	Male	53.9	18.78	18.8	5	4.61	5.06	4.81	4.33	10.66	12.49	23.06	24.19	12.78	23.31
Leptodactylus mystacinus	LGE 01695	PP El Piñalito; Misiones; Argentina	Male	52.88	17.94	18.39	5.5	5.04	5.37	4.7	3.63	9.75	12.51	23.44	23.93	12.9	24.76
Leptodactylus mystacinus	LGE 01696	PP El Piñalito; Misiones; Argentina	Male	52.59	18.38	18.47	5.05	4.93	5.21	4.24	3.96	9.3	11.73	22.94	23.07	12.26	24.16
Leptodactylus mystacinus	LGE 03952	Dos Hermanas; Misiones; Argentina	Male	51.76	17.99	19.14	5.11	4.62	5.67	4.31	3.55	11.51	11.63	24.51	24.86	13.59	25.2
Leptodactylus mystacinus	LGE 03982	PN Iguazí; Misiones; Argentina	Male	51.49	16.78	18.06	5.22	5.21	4.46	3.81	2.79	10.11	11.44	19.9	21.94	12.65	20.65
Leptodactylus mystacinus	LGE 03998	RNE San Antonio; Misiones; Argentina	Male	54.51	17.51	18.93	4.95	5.61	4.97	3.72	4.25	9.75	12.32	20.94	23.04	13.61	24.1
Leptodactylus mystacinus	LGE 04238	Colonia Villa Bonita; Misiones; Argentina	Male	55.85	18.67	18.28	5.31	4.18	5.03	4.5	2.94	9.73	12.28	24.08	23.75	13.12	24.12
Leptodactylus mystacinus	LGE 04239	Colonia Villa Bonita; Misiones; Argentina	Male	51.01	18.21	18.06	5.18	4.59	5.57	4.21	3.66	8.96	13.15	23.77	23.7	12.73	23.31
Leptodactylus mystacinus	LGE 04258	Colonia Villa Bonita; Misiones; Argentina	Male	56.04	18.42	19.18	5.02	5.4	4.96	4.17	3.59	10.23	12.59	21.79	21.51	13.58	22.98
Leptodactylus mystacinus	LGE 04259	Colonia Villa Bonita; Misiones; Argentina	Male	57.12	19.54	19.12	5.48	4.92	5.37	4.47	3.66	10.26	12.15	21.77	24.71	13.91	26.45
Leptodactylus mystacinus	LGE 04508	Dos Hermanas; Misiones; Argentina	Male	50.44	17.75	18.52	5.31	4.83	4.81	4.2	3.94	8.6	12.27	21.27	22.84	12.35	22.96
Leptodactylus mystacinus	LGE 04511	Dos Hermanas; Misiones; Argentina	Male	52.83	17.54	18.14	5.2	5.42	4.65	3.8	2.96	8.86	12.25	23.84	22.66	12.98	24.88
Leptodactylus mystacinus	LGE 04678	Puerto Esperanza; Misiones; Argentina	Male	51.78	16.79	17.36	5.02	4.34	4.79	4.12	3.32	9.99	12	23.01	23.96	12.96	20.15
Leptodactylus mystacinus	LGE 04959	Dos Hermanas; Misiones; Argentina	Male	51.17	18.06	17.92	5.01	4.41	4.62	4.07	3.01	9.52	12.12	23.15	23.13	12.57	23.3
Leptodactylus mystacinus	LGE 04960	Dos Hermanas; Misiones; Argentina	Male	53.87	18.36	19.09	5.52	5.56	4.71	4.34	3.99	8.77	13.08	23.54	22.39	12.72	24.34
Leptodactylus mystacinus	LGE 05861	Campo Arminda; Misiones; Argentina	Male	51.56	19.44	18.56	4.05	3.66	4.26	3.48	3.34	7.13	10.11	18.76	19.03	10.47	18.38
Leptodactylus mystacinus	LGE 06913	Puerto Libertad; Misiones; Argentina	Male	48.08	16.35	18.32	5.15	5.38	4.88	3.81	3.61	9.1	11.35	23.5	22.42	12.16	21.04
Leptodactylus mystacinus	LGE 06923	PP Urugua-í; Misiones; Argentina	Male	49.39	17.59	18.19	5.09	4.71	4.78	4.28	3.46	9.15	12.29	20.53	22.41	12.06	22.53
Leptodactylus mystacinus	LGE 06940	Puerto Libertad; Misiones; Argentina	Male	45.77	18.16	17.08	4.94	4.48	4.42	3.37	3.52	7.99	9.89	18.98	20.6	11.65	21.11
Leptodactylus mystacinus	LGE 06954	Reserva San Jorge; Misiones; Argentina	Male	55.09	18.9	19.3	6.44	4.82	4.76	3.97	3.64	8.77	12.41	22.51	23.63	12.52	22.89
Leptodactylus mystacinus	LGE 07075	Santiago de Liniers; Misiones; Argentina	Male	49.47	17.52	16.66	5.13	4.6	4.72	4.38	3.91	8.57	11.52	21.57	21.86	12.75	23.71
Leptodactylus mystacinus	LGE 07076	Santiago de Liniers; Misiones; Argentina	Male	51.96	17.87	18.21	5.6	4.99	4.92	3.94	4.09	9.67	12.47	21.68	23.31	13.38	23.26
Leptodactylus mystacinus	LGE 07604	Bdo irigoyen; Misiones; Argentina	Male	52.28	17.75	18.32	5.2	5.22	5.31	4.12	3.99	9.57	13.21	22.44	23.82	13.25	25.06
Leptodactylus mystacinus	LGE 07605	Bdo irigoyen; Misiones; Argentina	Male	51.99	17.25	18.61	5.16	5.08	4.67	4.57	3.77	8.88	11.94	21.74	22.72	12.5	23.34
Leptodactylus mystacinus	LGE 07607	Andresito; Misiones; Argentina	Male	50.81	17.31	18.03	5.75	4.76	4.65	4.21	4.75	10.52	11.81	21.44	23.21	12.55	22.94
Leptodactylus mystacinus	LGE 07608	Andresito; Misiones; Argentina	Male	50.9	17.66	17.01	4.78	4.74	4.59	4.49	4.62	8.92	12.22	21.69	21.7	12.08	22.2
Leptodactylus mystacinus	LGE 07613	PP El Piñalito; Misiones; Argentina	Male	51.56	19.44	18.56	4.31	4.05	4.42	3.56	2.23	7.22	10.41	17.96	18.65	9.86	19.51
Leptodactylus mystacinus	LGE 07615	Andresito; Misiones; Argentina	Male	54.21	18.3	18.5	5.29	4.46	4.5	4.05	3.63	9.65	12.87	24.1	23.47	13.04	26.04
Leptodactylus mystacinus	LGE 07616	Andresito; Misiones; Argentina	Male	52.07	18.13	18.04	4.98	5.07	4.88	4.34	3.06	9.54	12.29	22.52	22.6	11.79	23.18
Leptodactylus mystacinus	LGE 07773	Los Gigantes; Córdoba; Argentina	Male	51.45	16.71	18.7	4.86	3.63	4.74	3.92	2.77	7.76	12.82	22.02	21.78	11.47	22.82
Leptodactylus mystacinus	LGE 07774	Los Gigantes; Córdoba; Argentina	Male	56.16	18.07	19.66	5.19	4.08	5.29	4.68	4.43	8.99	12.42	23.37	23.13	12.59	19.55
Leptodactylus mystacinus	LGE 07890	Itacaruaré; Misiones; Argentina	Male	46.15	17.64	16.6	4.56	3.92	4.96	3.47	3.32	8.23	11.9	20.72	21.11	11.28	22.2
Leptodactylus mystacinus	LGE 07904	Puerto Panambí; Misiones; Argentina	Male	49.21	16.59	17.32	5.26	4.73	4.94	3.99	3.19	9.96	11.37	21.55	22.25	12.09	22.87
Leptodactylus mystacinus	LGE 09072	Garruchos; Corrientes; Argentina	Male	48.54	16.63	17.74	4.8	3.92	4.34	3.53	2.99	8.44	11.57	22	21.41	11.85	21.39
Leptodactylus mystacinus	LGE 09073	Garruchos; Corrientes; Argentina	Male	47.65	17.37	17.28	4.13	4.64	4.75	3.62	3.25	8.2	11.72	21.02	21.76	11.92	21.73
Leptodactylus mystacinus	LGE 09074	Garruchos; Corrientes; Argentina	Male	51.14	17.23	17.64	4.94	4.91	4.79	3.76	3.64	8.36	11.79	21.94	21.61	12.02	21.96
Leptodactylus mystacinus	LGE 09343	Paraje Caabí Poí; Corrientes; Argentina	Male	53.09	17.41	17.99	5.43	4.83	4.62	3.83	3.52	8.83	11.22	21.73	20.85	11.33	19.73
Leptodactylus mystacinus	LGE 10543	Candiota; Rio Grande do Sul; Brazil	Male	52.15	17.49	18.97	5.79	3.81	4.47	4.14	3.59	10.94	13.18	23.05	23.24	13.49	23.54
Leptodactylus mystacinus	LGE 12411	Reserva de Biosfera Yabotí, Ruta Provincial Nº 21; Misiones; Argentina	Male	51.86	17.78	16.92	5.31	5.35	4.8	3.98	3.66	9.46	11.15	22.78	22.12	12.89	23.46
Leptodactylus mystacinus	LGE 14994	Andresito, Estancia La Blanquita; Misiones; Argentina	Male	52.21	17.81	17.22	5.64	5.01	5.09	4.59	3.79	9.13	11.95	14.64	21.75	13.35	23.17
Leptodactylus mystacinus	LGE 14995	Andresito, Estancia La Blanquita; Misiones; Argentina	Male	50.12	18.42	17.56	5.33	4.56	4.8	4.08	3.81	10.03	12.63	22.88	24.03	13.41	25.47
Leptodactylus mystacinus	LGE 14996	Andresito, Estancia La Blanquita; Misiones; Argentina	Male	48.24	17.27	17.28	5.19	4.73	5	4.35	3.68	8.85	12.54	22.72	23.05	12.45	24.63
Leptodactylus mystacinus	LGE 14997	Andresito, Estancia La Blanquita; Misiones; Argentina	Male	51.94	18.03	17.82	5.79	4.63	5.35	4.21	3.82	9.84	12.77	23.44	24.02	13.56	24.27
Leptodactylus mystacinus	LGE 15201	Chajarí; Entre Rios; Argentina	Male	50.67	17.17	17.69	4.79	4.08	4.59	3.74	2.99	11.3	10.83	22.33	22.39	12.1	22.24
Leptodactylus mystacinus	LGE 15202	Chajarí; Entre Rios; Argentina	Male	45.19	16.34	17.24	5.19	4.06	4.25	3.5	3.14	10.26	11.36	22.18	21.29	12.11	21.1
Leptodactylus mystacinus	LGE 15204	Chajarí; Entre Rios; Argentina	Male	48.75	16.27	17.73	4.97	4.2	4.77	3.66	3.36	8.5	11.47	21.8	20.93	12.03	20.79
Leptodactylus mystacinus	LGE 15206	Chajarí; Entre Rios; Argentina	Male	48.14	16.65	17.27	4.91	3.83	4.63	3.34	3.02	7.98	11.28	21.97	22.23	12.89	20.84
Leptodactylus mystacinus	LGE 15207	Chajarí; Entre Rios; Argentina	Male	48.05	16.59	17.67	4.53	4.01	4.95	3.97	3.95	11.54	10.43	20.54	23.56	12.28	22.53
Leptodactylus mystacinus	LGE 15209	Colonia Victoria; Misiones; Argentina	Male	53.85	18.4	18.58	5.37	5.12	5.16	4	3.54	8.03	13.35	NA	23.48	13.94	24.06
Leptodactylus mystacinus	LGE 15210	Colonia Victoria; Misiones; Argentina	Male	56.49	19.53	18.58	5.27	4.24	5.33	4.49	3.86	8.96	13.67	NA	25.69	13.01	23.95
Leptodactylus mystacinus	LGE 15211	Colonia Victoria; Misiones; Argentina	Male	52.25	17.49	17.25	5.95	5	4.62	4.06	3.26	8	12.76	21.3	22.2	13.26	24.26
Leptodactylus mystacinus	LGE 15212	Aristobulo del Valle, Balneario del Arroyo Cuña Pirú; Misiones; Argentina	Male	51.69	18.44	17.44	4.94	5.22	5.22	4.44	3.53	9.09	12.74	21.2	21.32	13.37	24.4
Leptodactylus mystacinus	LGE 15215	Jesús Maria; Córdoba; Argentina	Male	46.58	14.96	16.17	4.79	3.84	3.61	3.2	2.87	6.41	10.33	21.71	18.58	9.77	18.99
Leptodactylus mystacinus	LGE 15216	Ñu Pyahú, Ruta Provincial Nº 3; Misiones; Argentina	Male	50.78	17.82	17.95	4.67	5.11	4.43	3.99	3.3	8.3	11.08	20.53	21.51	11.14	16.63
Leptodactylus mystacinus	LGE 15217	Ñu Pyahú, Ruta Provincial Nº 3; Misiones; Argentina	Male	49.89	17.52	17.26	6.27	4.25	4.53	3.76	3.26	8.16	11.96	16.29	21.27	11.86	22.14
Leptodactylus mystacinus	LGE 15218	Ñu Pyahú, Ruta Provincial Nº 3; Misiones; Argentina	Male	48.18	17.15	16.94	5.11	4.24	4.35	4.08	3.03	8.09	10.78	15.18	20.73	11.41	21.09
Leptodactylus mystacinus	LGE 15219	Parque Provincial Moconá; Misiones; Argentina	Male	50.54	17.44	18.5	5.25	4.13	5.42	4.72	4.01	10.79	10.62	23.64	23.69	13.11	24.11
Leptodactylus mystacinus	LGE 15220	Parque Provincial Moconá; Misiones; Argentina	Male	55.93	18.55	19.84	5.79	5.13	5.52	3.66	4.14	9.95	12.5	21.78	22.39	13.21	23.91
Leptodactylus mystacinus	LGE 15221	Parque Provincial Moconá; Misiones; Argentina	Male	59.76	19.51	19.7	6.17	5.12	4.64	4.79	4.41	10.75	12.64	21	24.07	14.48	24.7
Leptodactylus mystacinus	LGE 15222	Puerto Andresito; Misiones; Argentina	Male	48.03	17.34	17.41	5.15	4.45	4.81	3.96	3.22	8.72	12.39	21.89	22.23	12.13	22.86
Leptodactylus mystacinus	LGE 15224	Puerto Andresito; Misiones; Argentina	Male	50.14	17.2	18.64	5.8	4.85	4.52	4.33	3.13	8.92	12.21	22.59	23.94	13.36	23.9
Leptodactylus mystacinus	LGE 15225	Puerto Iguazú, 600 hectáreas; Misiones; Argentina	Male	49.44	17.16	17.75	5.02	4.26	5.04	4.46	3.7	8.87	11.2	21.76	23.15	13.26	22.74
Leptodactylus mystacinus	LGE 15233	Jesús Maria; Córdoba; Argentina	Male	49.69	16.06	15.59	5.06	3.89	4.21	3.3	2.88	7.4	10.48	11.22	16.34	9.98	19.69
Leptodactylus mystacinus	LGE 15235	Andresito; Misiones; Argentina	Male	49.89	16.47	18.12	4.93	4.34	5.01	3.54	4.17	8.71	12.75	24.13	23.13	11.19	24.31
Leptodactylus mystacinus	LGE 15237	Thompson; Entre Rios; Argentina	Male	50.8	16.62	19.44	4.18	4.02	2.99	4.09	3.3	9.66	12.15	14.12	22.21	12.53	20.24
Leptodactylus mystacinus	LGE 15245	San Sebastián de la Selva; Misiones; Argentina	Male	48.81	17.68	17.66	5.31	4.27	4.57	3.46	3.61	9.65	12.02	22.62	23.25	12.89	24.6
Leptodactylus mystacinus	LGE 15246	San Sebastián de la Selva; Misiones; Argentina	Male	51.44	18.46	19.77	5.37	4.3	4.08	4.67	3.82	9.7	13.36	23.94	24.8	14.45	26.79
Leptodactylus mystacinus	LGE 15252	Santiago Vázquez; Montevideo ; Uruguay	Male	49.36	17.33	17.92	5.37	4.05	4.5	3.82	3.31	9.02	11.59	21.52	20.73	11.27	20.47
Leptodactylus mystacinus	LGE 15253	Santiago Vázquez; Montevideo ; Uruguay	Male	51.38	17.25	18.14	5.49	3.82	4.54	4	3.44	8.87	12.19	21.94	22.93	12.03	22.06
Leptodactylus mystacinus	LGE 15254	Santiago Vázquez; Montevideo ; Uruguay	Male	47.45	15.77	17.09	4.95	3.82	4.44	3.68	3.26	9.76	11.2	21.41	20.62	11.77	21.01
Leptodactylus mystacinus	LGE 15255	Quebrada de los Cuervos; Treinta y Tres; Uruguay	Male	51.56	15.55	16.69	5.65	4.01	4.49	3.6	2.76	7.48	11.04	18.81	20.34	10.34	20.29
Leptodactylus mystacinus	LGE 15257	Bella Unión; Artigas; Uruguay	Male	47.11	16.13	17.51	5.12	3.9	4.2	3.53	3.44	8.33	12.05	20.5	20.95	11.73	22.34
Leptodactylus mystacinus	LGE 15258	Termas de Arapey; Salto; Uruguay	Male	48.85	15.84	17.58	3.97	3.81	4.2	3.51	3.55	9.37	11.16	19.03	20.18	11.07	19.83
Leptodactylus mystacinus	LGE 15261	Bañado de los Oliveras; Treinta y Tres; Uruguay	Male	50.53	16.27	18.02	5.57	3.92	4.56	3.96	3.13	8.94	12.8	23.39	21.47	12.24	21.85
Leptodactylus mystacinus	LGE 15262	34,5 km NW Rocha; Rocha; Uruguay	Male	51.58	17.37	18.47	5.65	4.45	4.69	3.85	3.55	8.92	12.1	17.75	22.73	13.77	22.94
Leptodactylus mystacinus	LGE 15263	La Pedrera; Rocha; Uruguay	Male	54.11	18.37	18.9	5.6	4.65	4.46	3.91	3.69	8.7	13.31	NA	18.41	12.89	22.91
Leptodactylus mystacinus	LGE 15266	Cementerio de los Fleitas; Treinta y Tres; Uruguay	Male	53.47	18.87	19.86	5.97	4.62	4.63	4.38	3.45	8.02	13.54	17.25	22.94	13.69	21.48
Leptodactylus mystacinus	LGE 15277	San Sebastián de la Selva; Misiones; Argentina	Male	50.8	17.47	17.41	5.54	5.01	4.53	4.18	3.17	8.57	12.42	21.29	23.59	13.2	23.87
Leptodactylus mystacinus	LGE 15278	San Sebastián de la Selva; Misiones; Argentina	Male	51.39	17.17	18.75	5.04	4.88	4.7	4.09	3.83	9.35	13.87	23.99	24.54	13.42	25.93
Leptodactylus mystacinus	LGE 15281	Ñu Pyahú, Ruta Provincial Nº 3; Misiones; Argentina	Male	48.15	15.79	16.23	5.07	4.62	4.12	3.37	3.45	9.11	10.65	21.72	20.75	10.77	21.93
Leptodactylus mystacinus	LGE 16441	Aristobulo del Valle, Balneario del Arroyo Cuña Pirú; Misiones; Argentina	Male	52.89	18.04	17.87	4.64	4.1	4.77	3.67	3.72	10.07	12.97	24.59	23.45	13.16	23.48
Leptodactylus mystacinus	LGE 16463	Aristobulo del Valle, Balneario del Arroyo Cuña Pirú; Misiones; Argentina	Male	54.11	18.25	17.85	5.26	5.14	4.69	4.5	3.53	8.87	12.77	23.33	23.7	13.11	22.76
Leptodactylus mystacinus	LGE 16483	Aristobulo del Valle, Balneario del Arroyo Cuña Pirú; Misiones; Argentina	Male	51.93	18	18.92	5.13	5.06	5.07	3.87	3.28	9.69	12.6	23.05	23.73	13.14	23.17
Leptodactylus mystacinus	LGE 16560	Balneario El Bonito, Villa Bonita; Misiones; Argentina	Male	53.35	18.29	18.67	5.12	4.71	4.79	4.17	3.5	10.49	12.08	24.29	24.47	13.53	23.89
Leptodactylus mystacinus	LGE 16561	Balneario El Bonito, Villa Bonita; Misiones; Argentina	Male	54.83	18.95	20.31	5.58	5.07	4.74	4.03	3.82	8.54	12.97	22.62	23.89	14.06	20.82
Leptodactylus mystacinus	LGE 16568	Balneario El Bonito, Villa Bonita; Misiones; Argentina	Male	54.49	18.23	17.3	5.38	4.86	4.57	4.33	3.49	9.88	11.99	24.38	23.64	12.61	22.72
Leptodactylus mystacinus	LGE 18772	Villaguay; Entre Rios; Argentina	Male	51.6	18.14	18.07	5.44	4.11	4.59	3.96	3.84	9.2	12.88	23.29	23.53	12.11	23.01
Leptodactylus mystacinus	LGE 18773	Villaguay; Entre Rios; Argentina	Male	52.19	18.53	19.15	6.17	4.09	4.63	3.75	3.27	9.19	12.68	23.09	23.49	12.02	21.98
Leptodactylus mystacinus	LGE 18887	Federal; Entre Rios; Argentina	Male	57.24	19.78	20.07	6.04	4.38	4.34	3.88	3.72	10.74	13.07	24.5	23.48	13.42	24.66
Leptodactylus mystacinus	LGE 18888	Federal; Entre Rios; Argentina	Male	52.8	18.4	17.87	5.63	4.28	4	3.58	3.54	8.95	12.04	21.92	21.2	11.72	22.89
Leptodactylus mystacinus	LGE 18889	Federal; Entre Rios; Argentina	Male	51.83	18.48	18.37	5.84	4.23	4.34	3.73	3.43	8.51	12.68	21.1	20.3	12.02	22.79
Leptodactylus mystacinus	LGE 18890	Federal; Entre Rios; Argentina	Male	51.71	17.85	17.51	5.37	3.84	4.71	3.38	3.39	9.64	11.28	20.65	21.58	11.42	22.12
Leptodactylus mystacinus	MACN 13106	Mburucuya; Corrientes; Argentina	Male	47.61	17.73	16.34	5.08	4.24	4.27	3.75	2.79	7.77	11.13	18.33	20.51	11.17	21.1
Leptodactylus mystacinus	MACN 13111	Mburucuya; Corrientes; Argentina	Male	47.87	17.78	16.92	5.19	3.62	4.02	3.18	4.36	10.1	11.06	19.54	21.02	11.67	19.3
Leptodactylus mystacinus	MACN 18316	General Pico; La Pampa; Argentina	Male	48.74	18.44	18.2	4.83	3.95	4.8	4.02	3.19	9.02	11.77	21.06	21.22	11.42	19.86
Leptodactylus mystacinus	MACN 19273	General Pico; La Pampa; Argentina	Male	46.5	20.07	17.84	5.04	3.84	4.44	3.72	3.07	8.92	12.12	18.47	21.59	12.06	21.42
Leptodactylus mystacinus	MACN 19441	General Pico; La Pampa; Argentina	Male	46.34	18.01	16.89	4.65	3.91	4.34	3.64	3.13	10.17	11.57	20.28	21.67	11.68	21.19
Leptodactylus mystacinus	MACN 20995	General Pico; La Pampa; Argentina	Male	45.19	18.2	16.97	5	3.65	4.41	4	3.16	7.75	11.18	17.44	21.75	11.58	19.63
Leptodactylus mystacinus	MACN 23270	Cerro Quemado; La Pampa; Argentina	Male	49.35	18.56	17.68	4.68	3.85	4.49	3.71	3.52	9.35	11.05	20.95	21.86	12.56	20.61
Leptodactylus mystacinus	MACN 23272	Cerro Quemado; La Pampa; Argentina	Male	49.56	18.58	17.19	5.39	3.94	4.35	3.48	2.93	8.83	10.49	18.76	21.26	11.63	19.68
Leptodactylus mystacinus	MACN 23709	Las Rosas; Santa Fe; Argentina	Male	47.03	18.65	16.79	4.96	3.58	4.15	3.31	3.22	9.49	11.56	18.96	21.19	12.02	20.79
Leptodactylus mystacinus	MACN 24228	Las Rosas; Santa Fe; Argentina	Male	51.56	17.24	15.28	4.51	3.9	4.32	3.55	3.04	8.52	10.56	16.35	18.8	10.6	19.55
Leptodactylus mystacinus	MACN 24229	Las Rosas; Santa Fe; Argentina	Male	45.24	17.72	16.3	4.58	3.76	4.52	3.83	3.62	9.2	10.81	15.83	21.21	11.72	20.47
Leptodactylus mystacinus	MACN 24230	Las Rosas; Santa Fe; Argentina	Male	47.48	16.69	16.17	4.64	3.75	4.66	4.01	2.56	8.61	10.4	18.81	20.31	11.96	20.5
Leptodactylus mystacinus	MACN 24231	Las Rosas; Santa Fe; Argentina	Male	48.24	17.36	16.53	4.86	3.72	4.78	3.62	2.9	9.87	12.17	18.15	22.06	12.46	21.45
Leptodactylus mystacinus	MACN 24232	Las Rosas; Santa Fe; Argentina	Male	45.28	16.37	15.28	3.95	3.86	4.25	3.36	3.11	9.34	10.95	17.37	20.13	10.95	20.65
Leptodactylus mystacinus	MACN 25175	Concepcion; Entre Rios; Argentina	Male	50.84	20.52	18.27	5.29	3.53	1.95	3.62	3.47	9.91	NA	21.76	21.29	20.97	21.03
Leptodactylus mystacinus	MACN 25176	Concepcion; Entre Rios; Argentina	Male	51.64	17.94	17.65	4.93	3.87	4.36	3.49	3.25	11.56	11.92	20.05	21.34	13.35	22.65
Leptodactylus mystacinus	MACN 26389	Ojo de agua; Santiago del Estero; Argentina	Male	49.81	18.45	17.47	4.8	3.48	4.09	3.55	2.9	7.95	11.5	21.74	21.23	10.76	20.81
Leptodactylus mystacinus	MACN 26390	Ojo de agua; Santiago del Estero; Argentina	Male	46.53	17.56	15.62	3.94	3.45	4.16	3.35	2.9	7.49	10.31	15.8	18.53	10.49	18.74
Leptodactylus mystacinus	MACN 26391	Ojo de agua; Santiago del Estero; Argentina	Male	51.28	21.86	17.48	4.35	3.71	4.24	3.59	3.46	8.19	11.27	16.61	18.12	10.48	20.77
Leptodactylus mystacinus	MACN 27590	Pronunciamiento; Entre Rios ; Argentina	Male	49.2	16.67	17.88	6.23	3.52	4.75	4.01	2.79	10.01	11.99	19.64	22.62	11.08	11.08
Leptodactylus mystacinus	MACN 29585	San Carlos; Corrientes; Argentina	Male	51.56	18.09	15.51	4.44	4.06	4.66	3.22	4.09	8.25	11.18	16.42	22.08	11.4	21.39
Leptodactylus mystacinus	MACN 29591	San Carlos; Corrientes; Argentina	Male	49.08	19.35	17.64	5.06	4.87	4.31	3.82	3.08	9.27	11.71	18.36	23.52	12.15	21.62
Leptodactylus mystacinus	MACN 33440	Verde; Córdoba; Argentina	Male	48.11	19.12	17.58	5.35	3.72	4.17	3.81	3.08	8.43	11.54	21.75	20.93	11.23	21.44
Leptodactylus mystacinus	MACN 36675	Santa Rosa de Conlara; San Luis; Argentina	Male	51.56	15.49	14.85	4.7	3.14	3.67	3.16	2.58	8.3	NA	16.72	17.12	9.97	18.56
Leptodactylus mystacinus	MACN 38112	Villaguay; Entre Rios; Argentina	Male	49.72	17.72	18.5	5.43	4.15	4.14	4.17	3.42	8.17	12.82	19.91	23.28	11.39	23.9
Leptodactylus mystacinus	MACN 38113	Villaguay; Entre Rios; Argentina	Male	52.15	19.83	18.06	4.77	3.86	4.94	3.91	4.41	9.66	12.23	21.03	22.8	12.64	23.05
Leptodactylus mystacinus	MACN 38114	Villaguay; Entre Rios; Argentina	Male	49.5	18.09	17.29	4.42	4.26	4.71	3.69	3.23	8.73	12.44	20.42	21	11.13	22.51
Leptodactylus mystacinus	MACN 40507	Junin; San Luis; Argentina	Male	53.11	22.46	18.99	5.04	3.64	4.21	4.02	NA	8.68	12.4	19.56	21.16	11.19	20.74
Leptodactylus mystacinus	MACN 45113	Junin; San Luis; Argentina	Male	49.39	19.89	17.21	4.39	3.79	4.25	3.74	3.43	8.61	10.82	20.12	20.71	11.5	20.39
Leptodactylus mystacinus	MACN 46206	Junin; San Luis; Argentina	Male	51.21	19.7	18.11	5.91	4.05	4.15	3.94	2.7	9.51	11.75	21.86	21.18	11.84	21.56
Leptodactylus mystacinus	MACN 46207	Junin; San Luis; Argentina	Male	49.87	18	16.63	4.77	3.77	4.05	3.69	3.36	8.87	11.98	20.89	21.49	11.59	22.18
Leptodactylus mystacinus	MACN 46254	Villa Larca; San Luis; Argentina	Male	51.88	19.99	18.99	5.24	4	4.85	3.6	3.64	9.17	12.14	21.07	21.33	12.42	23.33
Leptodactylus mystacinus	MACN 46520	La Paz; Entre Rios; Argentina	Male	48.72	17.15	16.61	4.81	3.86	4.65	3.72	3.69	8.85	11.04	21.36	20.66	10.59	20.79
Leptodactylus mystacinus	MACN 47303	La Paz; Entre Rios; Argentina	Male	49.22	18.96	16.93	4.88	3.67	4.23	4.08	NA	10.16	12.08	20.39	21.31	10.98	21.43
Leptodactylus mystacinus	MACN 47304	La Paz; Entre Rios; Argentina	Male	47.29	18.96	16.73	4.47	3.43	4.06	3.31	3.34	9.02	11.41	19.99	20.22	11.85	20.25
Leptodactylus mystacinus	MACN 47306	La Paz; Entre Rios; Argentina	Male	46.98	18.31	16.22	4.82	3.44	4.1	3.68	4.03	7.92	10.61	19.88	20.93	10.66	20.32
Leptodactylus mystacinus	MACN 47307	La Paz; Entre Rios; Argentina	Male	48.74	18.23	17.27	4.93	3.55	4.39	3.82	4.04	7.68	11.37	19.69	20.57	10.22	20.9
Leptodactylus mystacinus	MACN 49168	Junin; San Luis; Argentina	Male	53.89	18.74	17.4	5.37	3.43	4.6	3.65	3.84	8.52	12.54	22.9	21.77	11.46	22.6
Leptodactylus mystacinus	MACN 6913	Conhelo; La Pampa; Argentina	Male	47.86	18.56	17.76	5.62	3.89	4.57	3.65	3.26	8.6	11.78	20.58	21.13	12.07	21.1
Leptodactylus mystacinus	MACN 46313	Villaguay; Entre Rios; Argentina	Male	50.72	19.48	17.59	5.25	4.19	4.48	4.05	3.86	8.99	12.43	22.11	22.7	13.1	22.87
Leptodactylus mystacinus	MCP 00648	Itá; Santa Catarina; Brazil	Male	53.93	21.63	17.51	5.31	4.61	4.65	4.03	3.85	11.45	13.19	22.23	23.29	12.63	24.23
Leptodactylus mystacinus	MCP 00793	Garruchos; Rio Grande do Sul; Brazil	Male	51.85	20.19	18.37	5.48	4.04	4.2	3.49	3.71	10.1	10.96	20.96	22.6	11.6	22.64
Leptodactylus mystacinus	MCP 01583	Derrubadas; Rio Grande do Sul; Brazil	Male	50	21.14	18.64	5.65	4.42	4.88	3.58	4.12	9.35	11.42	21.2	21.88	13.23	23.23
Leptodactylus mystacinus	MCP 02047	Barragem Tacuarembó; Rio Grande do Sul; Brazil	Male	50.42	19.11	17.85	5.6	4.64	4.8	3.28	3.08	9.52	11.54	21.56	22.83	12.53	22.24
Leptodactylus mystacinus	MCP 02049	Reservatorio Rio Jordao; Paraná; Brazil	Male	52.84	19.25	18.84	4.95	4.4	4.8	3.81	3.45	10.95	11.91	19.97	22.95	13.34	23.9
Leptodactylus mystacinus	MCP 02346	U.H.E. Serra da Mesa; Goiás; Brazil	Male	58.52	22.61	21.28	6.09	4.8	5.23	3.97	4.05	10.53	12.93	26.53	24.92	13.15	25.04
Leptodactylus mystacinus	MCP 02574	Parque Florestal Estadual do turvo; Rio Grande do Sul; Brazil	Male	52.04	20.49	18.58	5.18	4.01	4.76	3.92	4.06	9.97	12.77	22.78	24.08	12.66	25.22
Leptodactylus mystacinus	MCP 02937	U.H.E. Serra da Mesa; Goiás; Brazil	Male	55.94	24.71	20.6	6.33	4.83	5.22	4.69	NA	10.85	12.64	22.05	26.21	15.46	26.67
Leptodactylus mystacinus	MCP 02938	U.H.E. Serra da Mesa; Goiás; Brazil	Male	51.56	17.77	16.69	4.81	4.15	3.91	3.19	3.5	7.45	10.44	17.12	18.88	10.51	20.1
Leptodactylus mystacinus	MCP 03231	Caçapava do Sul ; Rio Grande do Sul; Brazil	Male	48.04	18.33	16.65	4.98	3.46	4.15	4.03	NA	8.85	12.66	18.1	19.55	11.45	20.95
Leptodactylus mystacinus	MCP 03606	Flor da Serra do Sul; Paraná; Brazil	Male	53.42	20.97	19.41	5.58	4.43	5.24	3.72	4.74	9.31	12.94	24.01	24.67	14.16	24.74
Leptodactylus mystacinus	MCP 04243	Candiota; Rio Grande do Sul; Brazil	Male	51.33	20.11	17.4	5.05	3.92	4.24	3.17	3.01	10.08	11.78	22.53	21.29	11.9	22.85
Leptodactylus mystacinus	MCP 04244	Candiota; Rio Grande do Sul; Brazil	Male	49.38	20.62	18.24	6.25	3.82	3.91	3.67	3.95	9.76	12.6	21.7	21.71	11.84	23.57
Leptodactylus mystacinus	MCP 04299	Candiota; Rio Grande do Sul; Brazil	Male	50.57	19.92	17.51	5.8	3.68	3.99	4.2	2.68	9.52	11.65	19.79	20.17	10.39	21.62
Leptodactylus mystacinus	MCP 04372	Parque Florestal Estadual do turvo; Rio Grande do Sul; Brazil	Male	49.79	21.7	18.47	5.69	4.52	4.28	3.78	3.63	9.66	12.8	22.32	23.89	12.53	25.52
Leptodactylus mystacinus	MCP 04406	Candiota; Rio Grande do Sul; Brazil	Male	53.24	18.62	18.13	5.53	4.2	4.32	3.33	3.65	8.93	12.71	21.61	21.66	10.93	23.41
Leptodactylus mystacinus	MCP 07256	Santa Cruz do Sul; Rio Grande do Sul; Brazil	Male	48.42	18.7	17.15	5.72	3.87	3.65	3.31	3.55	9.81	12.17	21.27	20.1	10.41	23.32
Leptodactylus mystacinus	MCP 08208	São Jerónimo; Rio Grande do Sul; Brazil	Male	51.56	15.76	14.93	3.58	3.21	4.2	2.76	3	7.48	10.06	17.96	17.95	9.85	19.08
Leptodactylus mystacinus	MCP 08669	Estrada Seará; Santa Catarina; Brazil	Male	56.78	23.07	20.29	5.62	5.27	5.78	4.17	4.37	10.55	13.41	25.25	23.17	12.91	25.7
Leptodactylus mystacinus	MCP 09764	Xaxim; Santa Catarina; Brazil	Male	52.12	20.17	17.88	4.97	4.55	4.85	3.75	3.69	10.09	13.06	21.22	24.15	14.19	25.72
Leptodactylus mystacinus	MCP 10004	Dom Pedrito; Rio Grande do Sul; Brazil	Male	48.95	20.83	17.52	4.75	3.79	4.39	3.65	3.99	10.14	12.03	19.43	21.06	12.29	22.21
Leptodactylus mystacinus	MCP 10689	Passo do Vigario; Rio Grande do Sul; Brazil	Male	53.43	19.29	17.63	5.27	4.18	4.72	4.2	3.73	9.94	11.94	22.05	22.58	11.82	21.41
Leptodactylus mystacinus	MCP 10867	Sentinela do Sul; Rio Grande do Sul; Brazil	Male	45.1	18.35	17.42	5.25	3.27	3.97	3.27	3.46	8.73	11.5	18.78	19.54	11.43	21.46
Leptodactylus mystacinus	MCP 10892	Dom Pedrito; Rio Grande do Sul; Brazil	Male	47.07	18.4	17.05	4.56	3.77	4.03	3.97	3.33	9.03	11.99	21.8	21.52	11.03	23.79
Leptodactylus mystacinus	MCP 12305	Bom Progreso; Rio Grande do Sul; Brazil	Male	55.05	20.87	18.91	5.18	4.64	5.37	3.73	3.53	10.73	12.68	21.2	24.79	13.95	22.22
Leptodactylus mystacinus	MCP 12777	Brazilia; Goiás; Brazil	Male	49.25	19.9	17.67	3.8	4.16	4.22	3.57	3.59	9.57	12.2	22.49	22.09	11.85	23.3
Leptodactylus mystacinus	MCP 12824	Ortigueira; Paraná; Brazil	Male	51.72	24.14	18.89	4.71	4.18	4.41	4.43	3.81	8.99	11.93	21.76	22.56	12.87	22.29
Leptodactylus mystacinus	MNRJ 1050	Lagoa Santa ; Minas Gerais; Brazil	Male	55.57	19.9	18.5	6.19	4.73	4.72	3.11	3.53	9.48	13.86	22.88	25.07	14.73	26.66
Leptodactylus mystacinus	MNRJ 12423	Brazilia; Goiás; Brazil	Male	53.7	20.18	19.83	6.9	4.17	4.74	3.64	3.82	11.31	12.86	23.76	23.42	12.42	23.63
Leptodactylus mystacinus	MNRJ 18762	Santa Maria; Rio Grande do Sul; Brazil	Male	53.29	20.06	18.64	6.25	4.7	4.61	3.72	3.85	10.51	13.31	22.61	23.32	13.18	24.39
Leptodactylus mystacinus	MNRJ 19309	Botucatu; São Paulo; Brazil	Male	49.58	19.5	17.88	5.7	4.77	4.32	3.5	3.46	9.49	11.93	21.19	22.65	13.39	21.64
Leptodactylus mystacinus	MNRJ 19310	Botucatu; São Paulo; Brazil	Male	51.05	18.97	17.74	5.58	5.07	4.44	3.82	3.3	9.19	12.01	21.64	21.56	12.78	22.67
Leptodactylus mystacinus	MNRJ 19311	Botucatu; São Paulo; Brazil	Male	53	19.78	18.2	5.65	4.31	4.43	3.78	3.87	10.34	12.36	22.09	22.78	12.87	23.49
Leptodactylus mystacinus	MNRJ 20169	Serra d a Mesa; Goiás; Brazil	Male	45.98	18.07	17.41	6.23	4.17	4.1	3.64	3.14	9.07	11.02	19.37	20.66	10.62	20.71
Leptodactylus mystacinus	MNRJ 20171	Serra d a Mesa; Goiás; Brazil	Male	46.35	17.59	15.91	5.86	4.23	3.91	3.46	2.77	9.43	10.79	18.86	21.05	10.56	21.01
Leptodactylus mystacinus	MNRJ 20172	Serra d a Mesa; Goiás; Brazil	Male	54.2	20.08	20.05	6.16	4.68	4.77	3.74	4.48	9.61	13.09	23.12	24.51	13.57	24.5
Leptodactylus mystacinus	MNRJ 20173	Serra d a Mesa; Goiás; Brazil	Male	58.02	21.5	20.62	6.22	4.93	5.31	3.99	NA	12.73	11.8	24.32	26.56	14.49	24.47
Leptodactylus mystacinus	MNRJ 20179	Serra d a Mesa; Goiás; Brazil	Male	49.54	19.02	18.51	5.93	4.5	4.71	3.8	3.58	9.56	12.1	21.18	22.75	11.31	23.51
Leptodactylus mystacinus	MNRJ 20180	Serra d a Mesa; Goiás; Brazil	Male	60.39	22.26	21.05	6.69	5.54	5.23	4.32	NA	12.8	13.31	25.35	26.14	14.68	25.91
Leptodactylus mystacinus	MNRJ 20182	Serra d a Mesa; Goiás; Brazil	Male	46.4	18.39	17.27	5.18	4.13	4.87	3.54	3.57	9.43	11.88	19.37	21.3	12.42	22.31
Leptodactylus mystacinus	MNRJ 20184	Serra d a Mesa; Goiás; Brazil	Male	58.71	21.31	20.46	6.42	5.26	5.63	4.42	NA	9.32	14.43	23.51	24.93	14.56	25.41
Leptodactylus mystacinus	MNRJ 20185	Serra d a Mesa; Goiás; Brazil	Male	58.08	20.61	19.72	5.82	4.76	5.02	3.42	3.5	9.83	13.42	25.18	25.67	14.59	25.81
Leptodactylus mystacinus	MNRJ 20186	Serra d a Mesa; Goiás; Brazil	Male	48.46	18.74	18.5	5.27	4.21	4.24	3.55	3.58	11.13	11.71	20.32	22.26	13.14	23.82
Leptodactylus mystacinus	MNRJ 25449	Palmital; Rio de Janeiro; Brazil	Male	47.57	18.07	16.4	5.7	3.86	3.81	3.15	3.15	11.06	11.01	20.02	20.61	10.94	21.96
Leptodactylus mystacinus	MNRJ 25675	Guaratinga; Bahia; Brazil	Male	52.27	20.03	19.69	6.1	4.57	5.15	3.91	4.18	9.77	13.49	23.64	23.39	12.58	25.1
Leptodactylus mystacinus	MNRJ 2714	Brazilia; Goiás; Brazil	Male	47	18.27	18.74	6.05	4.07	5.2	3.76	3.55	11.05	12.52	21.98	22.08	12.46	23.23
Leptodactylus mystacinus	MNRJ 32353	Piraju; São Paulo; Brazil	Male	49.95	19.56	17.86	5.47	5.12	4.95	3.93	2.76	9.89	12.63	23.43	24.18	13.16	24.75
Leptodactylus mystacinus	MNRJ 32354	Piraju; São Paulo; Brazil	Male	49.83	20.19	18.6	5.8	4.91	4.52	4.13	3.84	8.79	11.28	22.43	22.81	12.91	22.31
Leptodactylus mystacinus	MNRJ 32355	Piraju; São Paulo; Brazil	Male	53.35	19.66	17.93	6.43	5.15	4.71	3.7	3.52	9.87	12.09	23.94	23.95	13.44	23.73
Leptodactylus mystacinus	MNRJ 32356	Piraju; São Paulo; Brazil	Male	52.07	19.48	17.84	5.27	5.06	5.1	3.91	3.34	9.26	12.69	23.74	23.56	12.39	24.46
Leptodactylus mystacinus	MNRJ 32358	Piraju; São Paulo; Brazil	Male	53.39	20.18	18.66	5.9	5.87	4.83	4.7	3.4	9.82	11.97	23.7	23.64	12.98	23.14
Leptodactylus mystacinus	MNRJ 32359	Piraju; São Paulo; Brazil	Male	49.86	19.03	17.81	5.42	4.71	4.93	3.39	4.11	8.74	11.17	21.77	22.26	11.8	21.85
Leptodactylus mystacinus	MNRJ 32361	Piraju; São Paulo; Brazil	Male	51.91	18.98	16.97	5.66	4.7	4.63	3.51	3.14	9.23	11.82	22.02	21.71	12.39	22.94
Leptodactylus mystacinus	MNRJ 32362	Piraju; São Paulo; Brazil	Male	50.62	19.65	18.05	5.53	5.51	4.85	3.93	3.92	9.4	10.62	22	21.51	12.56	21.75
Leptodactylus mystacinus	MNRJ 32363	Piraju; São Paulo; Brazil	Male	51.59	19.66	18.26	5.9	4.83	4.92	4.07	3.57	9.49	11.8	20.92	22.01	12.56	22.87
Leptodactylus mystacinus	MNRJ 329	Botucatu; São Paulo; Brazil	Male	54.8	19.8	18.67	6	4.99	5.21	4.05	3.51	10.55	12.51	23.68	24.28	13.6	24.39
Leptodactylus mystacinus	MNRJ 330	Botucatu; São Paulo; Brazil	Male	50.94	20.55	18.42	5.36	4.94	4.98	4.01	3.1	9.77	12.59	22.62	23.62	13.1	24.36
Leptodactylus mystacinus	MNRJ 331	Botucatu; São Paulo; Brazil	Male	50.83	19.78	17.65	5.41	4.95	4.73	3.78	3.16	10.18	12.3	22.69	23.35	12.29	23.96
Leptodactylus mystacinus	MNRJ 34493	Turmalina; Minas Gerais; Brazil	Male	48.92	18.14	17.06	5.36	4.29	4.52	3.55	2.86	11.09	11.63	18.54	20.77	12.44	21.23
Leptodactylus mystacinus	MNRJ 34494	Turmalina; Minas Gerais; Brazil	Male	49.05	18.26	16.92	6.35	4.89	4	3.76	3.21	9.53	11.19	20.49	21.62	12.05	22
Leptodactylus mystacinus	MNRJ 34496	Turmalina; Minas Gerais; Brazil	Male	48.29	18.97	17.64	5.85	4.32	4.47	3.94	NA	11.06	11.27	21.62	22.22	12.64	23.94
Leptodactylus mystacinus	MNRJ 35004	Linhares; Espiritu Santo; Brazil	Male	53.88	20.58	20.56	6.42	4.86	4.95	4.04	3.98	11.05	13.84	24.16	23.95	12.55	25.08
Leptodactylus mystacinus	MNRJ 398	Botucatu; São Paulo; Brazil	Male	49.96	18.28	17.35	5.56	4.94	4.37	3.87	3.75	9.79	11.36	21.17	21.58	12.85	22.92
Leptodactylus mystacinus	MNRJ 399	Botucatu; São Paulo; Brazil	Male	49.84	19.67	18.24	5.25	4.81	5.08	4.01	3.78	9.35	11.95	22.22	22.59	12.7	23.51
Leptodactylus mystacinus	MNRJ 40584	Cristália; Minas Gerais; Brazil	Male	56.47	20.78	20.06	6.26	4.8	4.54	3.59	3.16	10.02	12.67	23.59	23.31	11.73	24.4
Leptodactylus mystacinus	MNRJ 436	Botucatu; São Paulo; Brazil	Male	52.98	20.28	18.15	5.94	4.53	4.83	3.81	3.49	10.02	12.2	23.68	23.88	13.43	24.47
Leptodactylus mystacinus	MNRJ 45739	Arraial do cabo ; Rio de Janeiro; Brazil	Male	51.56	16.02	14.22	5.4	3.14	3.81	2.95	2.19	7.04	NA	16.29	16.6	NA	16.01
Leptodactylus mystacinus	MNRJ 46851	Itamaraju; Bahia; Brazil	Male	51.94	20.85	19.91	6.02	4.75	5.09	3.97	3.22	10.84	12.97	22.94	22.89	12.79	25.13
Leptodactylus mystacinus	MNRJ 47537	Cabo Frio; Rio de Janeiro; Brazil	Male	45.24	17.88	17.02	5.94	3.64	3.9	3.22	2.85	9.1	9.86	19.38	19.37	11.06	19.06
Leptodactylus mystacinus	MNRJ 5411	Teresopolis; Rio de Janeiro; Brazil	Male	49.32	18.73	17.68	5.48	4.71	4.21	3.37	3.63	11.19	11.76	22.92	21.68	13.87	22.51
Leptodactylus mystacinus	MNRJ 54952	Porto do Açu; Rio de Janeiro; Brazil	Male	47.42	16.69	16.08	5.49	3.83	3.73	2.73	3.5	8.38	9.12	17.27	16.65	9.91	18.44
Leptodactylus mystacinus	MNRJ 54954	Porto do Açu; Rio de Janeiro; Brazil	Male	47.55	18.45	17.51	5.18	3.56	4.66	3.22	3.57	8.51	10.55	18.67	20.28	11.15	19.87
Leptodactylus mystacinus	MNRJ 54955	Porto do Açu; Rio de Janeiro; Brazil	Male	51.56	16.09	15.85	6.01	3.5	4.25	2.85	2.42	8.27	NA	16.63	16.95	9.77	18.17
Leptodactylus mystacinus	MNRJ 55716	Iguaba Grande; Rio de Janeiro; Brazil	Male	48.13	18.74	17.43	5.65	4.44	4.71	3.51	3.43	8.27	11.98	21.37	20.8	10.92	21.94
Leptodactylus mystacinus	MNRJ 55717	Iguaba Grande; Rio de Janeiro; Brazil	Male	51.56	17.43	15.72	5.17	3.93	3.94	2.8	2.93	8.12	10.73	19.56	18.96	11.27	19.74
Leptodactylus mystacinus	MNRJ 56607	Iguaba Grande; Rio de Janeiro; Brazil	Male	51.05	18.09	16.96	5.81	4.17	3.93	3.17	3	8.48	12.3	21.01	19.35	11.58	20.7
Leptodactylus mystacinus	MNRJ 56608	Iguaba Grande; Rio de Janeiro; Brazil	Male	45.81	17	16.5	5.64	3.7	4.14	2.89	3.49	NA	NA	17.29	19.07	10.61	NA
Leptodactylus mystacinus	MNRJ 59404	Iguaba Grande; Rio de Janeiro; Brazil	Male	51.4	18.52	18.27	5.56	4.14	4.77	3.48	3.53	9.21	10.65	20.49	21.42	11.47	21.17
Leptodactylus mystacinus	MNRJ 60475	Catas Altas; Minas Gerais; Brazil	Male	49.87	18.83	18.1	6.34	4.83	4.61	3.7	3.75	9.04	12.53	22.3	22.47	12.65	23.95
Leptodactylus mystacinus	MNRJ 66171	Mimoso do Sul; Espiritu Santo; Brazil	Male	46.88	18.39	15.93	5.1	4.02	4.21	3.18	3.8	9.84	11.58	20.58	21.2	12.18	22.36
Leptodactylus mystacinus	MNRJ 66172	Mimoso do Sul; Espiritu Santo; Brazil	Male	49.66	19.89	18.11	5.46	4.44	4.99	3.04	4.26	10.27	11.47	21.35	21.42	12.09	23.26
Leptodactylus mystacinus	MNRJ 66430	Carapebus; Rio de Janeiro; Brazil	Male	51.47	18.5	18.42	5.6	4.43	4.74	3.36	3.5	9.48	11.71	21.24	21.15	11.49	21.91
Leptodactylus mystacinus	MNRJ 68450	Carapebus; Rio de Janeiro; Brazil	Male	48.78	18.06	16.79	5.58	4.07	3.81	3.2	3.13	9.89	10.86	18.99	20.28	11.07	21.89
Leptodactylus mystacinus	MNRJ 69321	Botucatu; São Paulo; Brazil	Male	50.61	19.84	17.92	5.92	4.89	4.77	3.72	3.6	9.32	12.12	23.45	23.1	13.6	23.61
Leptodactylus mystacinus	MNRJ 69322	Botucatu; São Paulo; Brazil	Male	50.84	20.49	18.31	5.24	4.72	4.55	3.78	3.79	9.57	11.97	23.18	22.81	13.52	22.18
Leptodactylus mystacinus	MNRJ 69323	Botucatu; São Paulo; Brazil	Male	50.15	18.2	16.74	5.73	4.71	4.51	3.83	3.06	9.27	11.53	21.52	21.84	11.75	22.24
Leptodactylus mystacinus	MNRJ 70495	Carapebus; Rio de Janeiro; Brazil	Male	46.83	17.28	15.62	4.93	4.02	4.98	3.38	3.53	9.79	10.85	21.71	20.7	11.08	21.88
Leptodactylus mystacinus	MNRJ 70632	Botucatu; São Paulo; Brazil	Male	49.39	18.17	17.36	5.19	4.93	4.62	3.53	3.36	8.67	11.4	22.49	21.48	12.83	22.52
Leptodactylus mystacinus	MNRJ 70633	Botucatu; São Paulo; Brazil	Male	50.59	18.82	16.85	5.62	4.35	4.79	3.68	3.07	10.5	11.34	22.03	21.32	12.23	23.67
Leptodactylus mystacinus	MNRJ 70635	Botucatu; São Paulo; Brazil	Male	54.48	20.74	19.33	6.46	5.46	4.81	3.75	3.65	10.16	12.62	23.26	24.75	13.99	24.84
Leptodactylus mystacinus	MNRJ 70640	Caaguazu; ; Paraguay	Male	46.05	17.44	16.27	5.01	4.06	3.84	3.72	3.52	8.38	11.81	20.87	21.99	11.25	22.67
Leptodactylus mystacinus	MNRJ 70641	Caaguazu; ; Paraguay	Male	53.4	19.38	17.92	5.77	4.86	4.61	3.39	4.02	10.97	11.67	22.92	23.99	12.41	24.69
Leptodactylus mystacinus	MNRJ 72831	Catas Altas; Minas Gerais; Brazil	Male	49.92	19.39	17.17	5.79	4.01	4.32	3.41	3.64	10.88	12.31	23.18	23.08	12.71	24.77
Leptodactylus mystacinus	MNRJ 73427	Silva Jardim; Rio de Janeiro; Brazil	Male	51.12	18.65	17.51	5.81	4.4	4.64	3.28	3.7	10.54	11.58	21.43	21.29	11.34	22.78
Leptodactylus mystacinus	MNRJ 73428	Silva Jardim ; Rio de Janeiro; Brazil	Male	51.85	19.29	17.9	6.31	4.93	4.42	3.34	3.31	10.8	11.63	22.95	22.08	12.51	24.9
Leptodactylus mystacinus	MNRJ 73722	Botucatu; São Paulo; Brazil	Male	57.84	20.69	18.75	6.52	5.12	4.98	4.07	3.57	10.11	12.72	22.64	22.83	12.37	23.96
Leptodactylus mystacinus	MNRJ 73871	Botucatu; São Paulo; Brazil	Male	53.33	21.16	19.27	6.31	5.76	4.91	4.17	3.41	9.62	13.23	23.36	25.29	14.44	24.05
Leptodactylus mystacinus	MNRJ 73872	Botucatu; São Paulo; Brazil	Male	50.51	19.53	17.68	6.49	5.14	4.44	3.97	3.62	8.87	12.28	21.93	22.35	13.06	22.66
Leptodactylus mystacinus	MNRJ 73873	Botucatu; São Paulo; Brazil	Male	51.09	20.35	18.05	6.56	5.32	4.91	4.07	4.05	10.52	11.69	21.63	23.1	12.76	24.14
Leptodactylus mystacinus	MNRJ 73874	Botucatu; São Paulo; Brazil	Male	50.23	20.11	18.24	6.2	5.12	4.55	3.81	3.98	9.12	12.14	22.34	22.92	12.43	23.95
Leptodactylus mystacinus	MNRJ 73878	Botucatu; São Paulo; Brazil	Male	50.68	19.48	18.27	5.68	5.13	4.7	3.7	3.17	10.45	12.1	22.32	20.98	12.7	24.2
Leptodactylus mystacinus	MNRJ 74033	Jardim Silveira; São Paulo; Brazil	Male	50.27	19.18	17.73	5.97	4.57	4.9	3.8	3.19	10.06	12.66	22.33	22.37	12.85	23.19
Leptodactylus mystacinus	MNRJ 74513	Botucatu; São Paulo; Brazil	Male	51.26	19.33	18.07	6.02	4.87	4.74	3.99	3.35	9.48	11.75	23.01	23.79	14.21	24.13
Leptodactylus mystacinus	MNRJ 75224	Botucatu; São Paulo; Brazil	Male	52.32	19.69	18.46	5.7	4.76	4.46	4.07	3.56	10.29	11.44	22.77	22.78	12.72	23.99
Leptodactylus mystacinus	MNRJ 77818	Espraiado; Rio de Janeiro; Brazil	Male	50.81	19.29	17.85	6.46	4.76	4.75	3.6	3.31	9.44	11.77	23.23	22.78	12.05	21.78
Leptodactylus mystacinus	MNRJ 81618	Botucatu; São Paulo; Brazil	Male	52.99	18.79	17.53	5.49	5.49	4.34	3.87	3.54	8.73	12.41	22.17	23.28	13.67	24.45
Leptodactylus mystacinus	MNRJ 82058	Botucatu; São Paulo; Brazil	Male	54.81	20.3	17.96	5.81	5.15	4.62	3.86	3.47	10.33	12.49	23.78	23.6	13.66	26.26
Leptodactylus mystacinus	MNRJ 82059	Botucatu; São Paulo; Brazil	Male	50.22	19.54	16.83	5.51	4.94	4.8	3.85	3.26	10.16	11.41	21.71	21.79	11.82	22.03
Leptodactylus mystacinus	MNRJ 82060	Botucatu; São Paulo; Brazil	Male	49.15	18.69	16.94	6.01	5.01	4.53	3.71	3.52	8.81	12.61	22	21.8	11.86	22.49
Leptodactylus mystacinus	MNRJ 83438	Botucatu; São Paulo; Brazil	Male	52.53	20.27	18.55	5.75	5.15	5.24	4.09	3.77	10.69	12.76	22.82	23.93	12.49	23.93
Leptodactylus mystacinus	MNRJ 83439	Botucatu; São Paulo; Brazil	Male	55.19	21.55	18.76	6.14	5.63	5.31	3.94	3.91	10.52	12.41	23.47	24.24	14.17	24.12
Leptodactylus mystacinus	MNRJ 83440	Botucatu; São Paulo; Brazil	Male	48.78	19.14	17.17	4.86	4.62	5.08	3.49	3.2	9.97	12.22	22.29	21.97	13.86	23.47
Leptodactylus mystacinus	MNRJ 84229	Itaperuna; Rio de Janeiro; Brazil	Male	54.58	20.16	20.32	5.84	4.65	4.94	3.86	3.14	8.91	12.52	22.55	22.65	11.77	23.18
Leptodactylus mystacinus	MNRJ 84230	Itaperuna; Rio de Janeiro; Brazil	Male	48.54	18.39	17.18	5.73	4.39	4.24	3.59	2.92	10.27	11.59	20.3	20.85	11.15	20.49
Leptodactylus mystacinus	MNRJ 85549	Pirenópolis; Goiás; Brazil	Male	57.75	21.88	20.25	6.68	5.45	5.62	4.39	4.48	11.7	13.5	26.26	24.86	14.01	25.64
Leptodactylus mystacinus	MNRJ 85550	Pirenópolis; Goiás; Brazil	Male	59.78	21.61	20.71	6.16	4.92	5.2	4.45	4.31	10.72	13.54	25.71	25.07	13.52	25.97
Leptodactylus mystacinus	MNRJ 86720	Guapiaçu; Rio de Janeiro; Brazil	Male	49.78	18.89	18.78	6.1	4.38	4.12	3.19	3.28	11.49	10.69	22.15	22.24	10.91	21.23
Leptodactylus mystacinus	MNRJ 87158	Rosario Oeste; Mato Grosso; Brazil	Male	53.47	20.99	19.29	6.44	4.37	5.13	3.78	3.67	11.28	12.74	24.1	24.67	13.49	24.69
Leptodactylus mystacinus	MNRJ 87159	Rosario Oeste; Mato Grosso; Brazil	Male	51.29	20.01	18.45	5.55	4.71	5.33	3.53	3.57	11.51	12.55	23.11	23.24	12.6	24.04
Leptodactylus mystacinus	MNRJ 87639	Iramaia; Bahia; Brazil	Male	49.11	18.78	17.71	5.06	4.03	4.81	3.07	3.48	11	12.27	18.95	21.56	12.09	23.33
Leptodactylus mystacinus	MNRJ 87640	Iramaia; Bahia; Brazil	Male	48.83	18.12	17.51	5.88	3.9	4.35	3.34	3.47	8.84	11.94	21.05	20.6	11.92	21.9
Leptodactylus mystacinus	MNRJ 87981	Carapebus; Rio de Janeiro; Brazil	Male	46.39	19.16	17.43	5.65	3.74	4.07	3.02	2.98	8.38	10.57	19.75	19.59	11.34	20.29
Leptodactylus mystacinus	MNRJ 87983	Carapebus; Rio de Janeiro; Brazil	Male	49.65	18.87	17.36	6.69	4.61	4.38	3.17	4.19	9.78	11.13	21.68	20.93	11.18	21.81
Leptodactylus mystacinus	MNRJ 87984	Carapebus; Rio de Janeiro; Brazil	Male	48.38	19.93	17.57	5.89	4.66	4.99	3.49	3.67	9.97	11.45	22.39	22.34	12.25	22.39
Leptodactylus mystacinus	MNRJ 87985	Carapebus; Rio de Janeiro; Brazil	Male	54.2	20.33	19.58	6.54	4.87	4.71	3.59	3.95	10.05	11.35	21.18	21.67	12.29	NA
Leptodactylus mystacinus	MNRJ 87987	Carapebus; Rio de Janeiro; Brazil	Male	51.3	19.2	17.89	5.86	4.3	4.25	3.29	3.35	10.7	11.61	16.72	22.41	11.73	22.7
Leptodactylus mystacinus	MNRJ 87989	Carapebus; Rio de Janeiro; Brazil	Male	52.26	20.27	19.81	5.99	4.45	4.34	3.83	3.6	9.42	11.23	23.07	22.09	11.25	22.24
Leptodactylus mystacinus	MNRJ 88950	Grão Mogol; Minas Gerais; Brazil	Male	48.39	18.71	17.72	5.55	4.56	4.63	3.53	3.56	10.04	12.18	19.3	20.56	11.38	22.31
Leptodactylus mystacinus	MNRJ 88956	Grão Mogol; Minas Gerais; Brazil	Male	55.18	19.78	19.28	6.45	5.17	5.21	3.95	3.12	10.32	13.43	23.72	23.09	12.67	24.73
Leptodactylus mystacinus	MNRJ 89254	Carapebus; Rio de Janeiro; Brazil	Male	49.3	19.08	18.36	5.56	4.7	4.25	3.53	3.56	9.14	11.04	20.3	20.47	11.75	21.05
Leptodactylus mystacinus	MNRJ 89255	Carapebus; Rio de Janeiro; Brazil	Male	48.77	18.79	18.18	5.88	4.44	4.09	3.53	3.68	10.2	11.04	21.2	20.28	11.8	21.79
Leptodactylus mystacinus	MNRJ 90172	Macaé; Rio de Janeiro; Brazil	Male	57.38	20.26	18.96	6.08	4.9	4.2	3.78	3.16	10.24	12.83	22.12	23.27	12.9	23.49
Leptodactylus mystacinus	MNRJ 90173	Carapebus; Rio de Janeiro; Brazil	Male	50.39	19.4	17.98	5.64	4.32	4.69	3.58	3.61	8.38	11.84	20.79	21.59	11.71	23.2
Leptodactylus mystacinus	MNRJ 90174	Carapebus; Rio de Janeiro; Brazil	Male	53.73	20.47	19.59	6.15	4.78	5.06	3.33	4.1	9.47	12.94	22.17	22.74	12.21	25.2
Leptodactylus mystacinus	MNRJ 90269	Juiz de Fora; Minas Gerais; Brazil	Male	51.36	18.61	17.38	5.48	4.49	4.06	3.58	3.27	10	10.93	20.89	22.4	13.26	20.97
Leptodactylus mystacinus	MNRJ 90270	Juiz de Fora; Minas Gerais; Brazil	Male	51.84	18.85	17.62	6.25	4.62	5.02	3.44	3.39	9.55	12.17	20.56	21.41	12.87	21.55
Leptodactylus mystacinus	MNRJ 91251	Patrocinio Paulista; São Paulo; Brazil	Male	53.7	20.77	19.16	6.1	5.17	5.4	3.84	3.79	9.88	12.79	23.69	24.22	12.79	26.05
Leptodactylus mystacinus	MNRJ 91466	Sao Joao Marcos; Rio de Janeiro; Brazil	Male	48.36	19.26	17.84	5.16	4.81	4.25	3.57	3.94	9.31	11.22	23.08	22.55	13.05	22.12
Leptodactylus mystacinus	MNRJ 91467	Sao Joao Marcos; Rio de Janeiro; Brazil	Male	49.37	19.07	16.68	4.83	4.3	5.05	3.27	3.71	9.86	8.92	21.05	22.05	12.04	21.74
Leptodactylus mystacinus	MNRJ 91556	Morro do Chapéu; Bahia; Brazil	Male	52.57	19.75	18.63	6.06	4.48	4.38	3.33	3.23	10.58	12.08	22.11	23.11	11.2	23.66
Leptodactylus mystacinus	MTR 23676	Cabeça de Boi ; Minas Gerais; Brazil	Male	51.56	17.68	16.9	4.6	3.62	4.42	3.01	3.5	8.84	11.49	18.94	20.54	11.91	21.62
Leptodactylus mystacinus	MTR 23786	Cabeça de Boi ; Minas Gerais; Brazil	Male	47.86	18.27	16.84	5.6	4.16	5.02	3.45	3.21	9.53	11.85	22.68	22.47	12.11	21.32
Leptodactylus mystacinus	MTR 23805	Cabeça de Boi ; Minas Gerais; Brazil	Male	45.56	17.24	16.38	5.35	4.15	4.44	3.07	3.1	9.12	12.06	20.56	23.22	12.55	22.97
Leptodactylus mystacinus	MTR 24976	Gruta do Caiçara; Bahia; Brazil	Male	50.77	18.69	18.39	4.39	3.7	4.45	3.6	3.46	9.17	12.77	22.23	21.79	11.67	22.44
Leptodactylus mystacinus	MZUSP 008697	Nova Teutonia; Santa Catarina; Brazil	Male	49.59	18.14	17.41	4.54	4.45	4.58	3.61	3.47	7.04	11.25	21.04	21.88	11.78	22.12
Leptodactylus mystacinus	MZUSP 015300	Aquidauana; Mato Grosso; Brazil	Male	51.56	16.13	14.67	4.86	3.69	3.46	3.08	2.89	7.2	10.05	16.14	18.63	10.55	17.42
Leptodactylus mystacinus	MZUSP 015877	Lagoa Santa; Minas Gerais; Brazil	Male	50.23	18.96	19.49	5.64	4.36	4.67	4.04	NA	8.94	13.06	23.01	23.36	12.04	23.94
Leptodactylus mystacinus	MZUSP 022640	Canelones; ; Uruguay	Male	52.41	19.53	18.28	5.99	4.21	4.59	3.37	3.2	10.62	11.94	19.33	22.27	12.65	22.29
Leptodactylus mystacinus	MZUSP 022641	Canelones; ; Uruguay	Male	56.36	19.64	18.48	6.03	3.99	4.57	3.52	3.25	10.18	12.57	18.89	24.99	13.36	24.33
Leptodactylus mystacinus	MZUSP 024155	Santo Antonio da Platina ; Paraná; Brazil	Male	54	19.73	19.21	6.18	4.77	5.43	3.5	3.55	10.1	11.96	23.5	24.88	13.44	22.59
Leptodactylus mystacinus	MZUSP 025456	Santa Branca; São Paulo; Brazil	Male	55.45	21.4	18.84	6.01	5.29	5.67	3.8	3.58	13.31	12.44	18.12	24.51	13.48	24.78
Leptodactylus mystacinus	MZUSP 050220	Lavalleja; ; Uruguay	Male	56.21	20.07	19.87	5.81	4.57	4.92	3.62	3.3	12.91	12.07	24.58	25.6	14.07	25.09
Leptodactylus mystacinus	MZUSP 053033	Serra da Bocaina; São Paulo; Brazil	Male	53.09	19.65	17.18	5.77	4.54	4.45	3.12	3.99	11.69	11.56	21.87	22.73	13.85	23.87
Leptodactylus mystacinus	MZUSP 053206	Serra da Bocaina; São Paulo; Brazil	Male	47.6	18.3	16.18	4.84	4.51	4.26	2.63	3.14	8.86	11.1	20.82	16.49	13.04	21.33
Leptodactylus mystacinus	MZUSP 053208	Serra da Bocaina; São Paulo; Brazil	Male	50.22	19.14	17.43	6	4.72	4.32	3.53	3.57	8.7	11.29	21.34	22.18	13.03	20.89
Leptodactylus mystacinus	MZUSP 053209	Serra da Bocaina; São Paulo; Brazil	Male	50.98	19.17	17.65	5.6	4.84	4.17	3.05	4.01	9.95	12.19	21.72	22.24	13.41	21.61
Leptodactylus mystacinus	MZUSP 053214	Serra da Bocaina; São Paulo; Brazil	Male	46.96	20.12	17.6	6.28	4.47	4.95	3.34	3.61	11.14	12.3	21.05	21.15	12.55	22.29
Leptodactylus mystacinus	MZUSP 053215	Serra da Bocaina; São Paulo; Brazil	Male	48	19.14	17.14	4.96	4.57	4.49	3.7	3.11	8.13	11.86	21.61	21.91	11.74	21.22
Leptodactylus mystacinus	MZUSP 083282	Felipe Sola; Buenos Aires; ARGENTINA	Male	51.21	19.61	19.72	6.06	3.91	4.71	3.62	3.48	9.63	11.99	22.59	22.9	12.7	22.94
Leptodactylus mystacinus	MZUSP 083285	Itu; São Paulo; Brazil	Male	52.19	18.4	17.22	5.71	5.02	4.52	3.88	3.28	11.06	11.57	18.89	23.35	11.84	23.03
Leptodactylus mystacinus	MZUSP 083296	Maldonado ; ; Uruguay	Male	57.52	19.73	20.71	6.02	4.17	4.62	3.63	3.14	13.23	12.59	20.93	25.38	13.73	23.11
Leptodactylus mystacinus	MZUSP 083593	Maracás; Bahia; Brazil	Male	51.42	19.04	18.43	5.94	4.24	4.29	2.91	3.08	10.1	12.93	21.55	22.71	11.18	23.42
Leptodactylus mystacinus	MZUSP 083594	Maracás; Bahia; Brazil	Male	48.36	18.9	18.23	4.74	4.17	4.13	2.91	3.11	9.54	12.37	19.78	21.21	11.45	22.17
Leptodactylus mystacinus	MZUSP 083595	Maracás; Bahia; Brazil	Male	52	19.8	19.18	5.47	4.47	4.29	3.87	2.95	10.32	13.17	23.9	23.11	12.83	24.29
Leptodactylus mystacinus	MZUSP 089748	UHE Serra da Mesa; Goiás; Brazil	Male	57.65	21.87	20.35	6.15	4.87	4.62	4.02	NA	11.53	13.4	21.83	26.72	14.04	24.84
Leptodactylus mystacinus	MZUSP 089751	UHE Serra da Mesa; Goiás; Brazil	Male	56.98	20.99	19.93	7.01	4.52	5.09	3.7	3.51	12.13	12.42	22.73	25.3	13.44	23.64
Leptodactylus mystacinus	MZUSP 089763	UHE Serra da Mesa; Goiás; Brazil	Male	60.87	22.73	20.82	6.31	5.06	5.74	4.24	4.39	12.38	14.3	25.07	27.96	15	27.16
Leptodactylus mystacinus	MZUSP 089776	UHE Serra da Mesa; Goiás; Brazil	Male	50.39	20.5	18.46	6.1	4.42	4.55	3.38	3.47	10.66	11.63	21.81	23.71	12.56	23.48
Leptodactylus mystacinus	MZUSP 089782	UHE Serra da Mesa; Goiás; Brazil	Male	46.28	17.01	17.22	5.29	4.28	4.39	3.34	3.6	9.43	10.89	18.29	21.17	11.62	21.48
Leptodactylus mystacinus	MZUSP 089783	UHE Serra da Mesa; Goiás; Brazil	Male	50.89	20.02	18.58	4.94	4.34	5.05	3.09	4.12	10.98	12.38	21.61	22.91	11.51	23.8
Leptodactylus mystacinus	MZUSP 089784	UHE Serra da Mesa; Goiás; Brazil	Male	55.5	20.31	19.35	6.38	5.27	4.44	3.99	3.06	10.02	13.02	21.43	24.51	12.59	24.81
Leptodactylus mystacinus	MZUSP 089787	UHE Serra da Mesa; Goiás; Brazil	Male	60.27	23.81	22.1	7.27	5.19	5.17	4.45	3.56	11.51	13.89	24.49	26.31	13.89	26.88
Leptodactylus mystacinus	MZUSP 089788	UHE Serra da Mesa; Goiás; Brazil	Male	55.03	22.21	19.95	6.94	4.6	4.69	4.08	3.92	12.06	12.76	23.14	26.51	13.06	24.76
Leptodactylus mystacinus	MZUSP 089789	UHE Serra da Mesa; Goiás; Brazil	Male	49.51	18.77	17.64	5.46	4.2	5.25	3.62	3.34	11.18	11.76	20.03	23.04	13.01	24.39
Leptodactylus mystacinus	MZUSP 089793	UHE Serra da Mesa; Goiás; Brazil	Male	52.59	19.74	19.11	5.34	4.53	5.17	3.65	3.62	10.98	12.19	22.47	24.56	13.8	25.57
Leptodactylus mystacinus	MZUSP 089798	UHE Serra da Mesa; Goiás; Brazil	Male	60.44	23.09	21.8	6.59	5.39	5.25	4.89	3.99	11.41	14.45	27	27.01	14.76	26.76
Leptodactylus mystacinus	MZUSP 089807	UHE Serra da Mesa; Goiás; Brazil	Male	52.19	20.01	18.4	5.76	4.66	5.23	3.86	3.35	8.65	12.59	21.5	23.08	12.49	24.64
Leptodactylus mystacinus	MZUSP 100960	UHE Manso; Mato Grosso; Brazil	Male	55.84	20.74	19.17	6.11	4.68	4.93	3.8	3.43	9.29	12.8	22.92	24.36	13.57	24.3
Leptodactylus mystacinus	MZUSP 100961	UHE Manso; Mato Grosso; Brazil	Male	59.59	23.91	21.1	7.37	5.06	4.96	3.76	3.59	11.27	12.14	22.68	24.72	14.93	25.19
Leptodactylus mystacinus	MZUSP 100962	UHE Manso; Mato Grosso; Brazil	Male	56.81	20.8	19.55	6.55	4.46	4.53	3.48	3.5	10.97	12.91	22.03	23.73	12.96	24.36
Leptodactylus mystacinus	MZUSP 100970	UHE Manso; Mato Grosso; Brazil	Male	52	20.1	17.63	5.62	4.64	5.24	3.04	3.85	9.61	12.64	23.27	23.48	13.21	23.22
Leptodactylus mystacinus	MZUSP 100971	UHE Manso; Mato Grosso; Brazil	Male	57.36	20.69	19.95	6.71	5.13	4.89	4.05	3.91	8.09	13.62	20.94	24.11	12.78	25.17
Leptodactylus mystacinus	MZUSP 100973	UHE Manso; Mato Grosso; Brazil	Male	46.61	19.13	18.21	5.24	4.23	4.69	3.46	3.41	8.28	12.19	20.54	22.85	11.98	21.08
Leptodactylus mystacinus	MZUSP 100974	UHE Manso; Mato Grosso; Brazil	Male	48.01	20.14	17.64	6.07	4.18	4.69	3.3	3.61	8.3	11.91	19.29	21.53	11.71	21.9
Leptodactylus mystacinus	MZUSP 100976	UHE Manso; Mato Grosso; Brazil	Male	56.7	20.47	20.91	5.83	4.47	4.78	3.92	NA	10.65	13.31	23.45	24.33	13.4	22.86
Leptodactylus mystacinus	MZUSP 100977	UHE Manso; Mato Grosso; Brazil	Male	49.26	21.89	17.75	5.56	4.71	5.01	3.39	3.62	10.08	11.91	21.74	23.74	12.93	22.4
Leptodactylus mystacinus	MZUSP 131608	Jaguaré; São Paulo; Brazil	Male	51.55	20.67	19.76	5.14	4.88	5.48	3.7	3.51	9.73	12.38	24.54	24.05	12.99	23.65
Leptodactylus mystacinus	MZUSP 134834	Buri; São Paulo; Brazil	Male	50.08	19.72	17.53	5.83	4.17	4.78	3.57	3.59	9.7	10.67	19.81	21.93	11.48	22.82
Leptodactylus mystacinus	MZUSP 134835	Buri; São Paulo; Brazil	Male	49.64	18.7	17.2	4.95	4.9	4.33	2.86	3.03	9.67	11.56	22.02	22.54	12.47	21.9
Leptodactylus mystacinus	MZUSP 134836	Buri; São Paulo; Brazil	Male	45.2	18.37	17.68	5.29	4.63	4.89	3.53	3.87	8.94	12.09	21.3	21.48	11.78	23.15
Leptodactylus mystacinus	MZUSP 134837	Buri; São Paulo; Brazil	Male	47.76	20.96	18.18	5.02	4.29	4.21	3.15	3.61	9.48	12.12	22.74	22.84	12.1	25.29
Leptodactylus mystacinus	MZUSP 138165	Itararé; São Paulo; Brazil	Male	55.27	22.12	19.76	5.88	5.02	5.49	3.76	3.57	10.86	12	22.91	24.06	13.33	23.86
Leptodactylus mystacinus	MZUSP 138167	Itararé; São Paulo; Brazil	Male	54.37	21.16	17.98	5.4	4.87	4.5	3.31	3.6	10.2	12.07	18.72	24.16	12.61	22.85
Leptodactylus mystacinus	MZUSP 138168	Itararé; São Paulo; Brazil	Male	51.8	21.08	19.18	5.48	5.47	4.77	3.89	3.08	13.3	12.97	21.29	25.22	13.37	24.53
Leptodactylus mystacinus	MZUSP 138175	Itararé; São Paulo; Brazil	Male	54.97	23.59	19.64	5.85	5.07	4.94	2.84	3.89	11.38	10.61	18.88	23.94	13.28	23.57
Leptodactylus mystacinus	MZUSP 138176	Itararé; São Paulo; Brazil	Male	51.31	19.74	18.18	5.38	4.45	5.42	3.37	3.41	11.45	12.79	20.4	24.52	13.5	24.24
Leptodactylus mystacinus	MZUSP 138177	Itapeva; São Paulo; Brazil	Male	53.32	20.22	18.27	5.36	4.43	4.95	4.01	3.89	11.11	11.51	20.97	23.42	12.77	22.65
Leptodactylus mystacinus	MZUSP 140858	UHE Corumbá; Goiás; Brazil	Male	52.95	20.66	19.32	5.9	4.36	4.94	3.51	4.25	9.35	13.24	24.3	23.85	12.59	22.89
Leptodactylus mystacinus	MZUSP 140860	UHE Corumbá; Goiás; Brazil	Male	52.73	20.08	17.44	5.71	4.62	4.12	3.14	3.27	9.36	13.02	24.66	24.07	12.22	24.97
Leptodactylus mystacinus	MZUSP 140865	UHE Corumbá; Goiás; Brazil	Male	51.87	19.82	18.04	6.19	4.43	4.43	3.65	3.62	9.78	12.34	23.82	22.6	12.97	23.28
Leptodactylus mystacinus	MZUSP 140866	UHE Corumbá; Goiás; Brazil	Male	53.11	21.58	18.92	6.36	4.5	5.23	4.05	3.78	10.75	13.2	22.64	24.03	13.56	24.24
Leptodactylus mystacinus	MZUSP 140867	UHE Corumbá; Goiás; Brazil	Male	51.39	20.32	18.47	6.58	4.71	4.72	3.78	3.68	9.77	14.37	23.93	23.52	12.94	24.33
Leptodactylus mystacinus	MZUSP 140948	UHE Corumbá; Goiás; Brazil	Male	46.78	19.97	17.78	5.75	4.23	4.86	2.87	3.5	10.94	11.88	20.8	22.27	12.72	22.37
Leptodactylus mystacinus	MZUSP 140951	UHE Corumbá; Goiás; Brazil	Male	54.87	20.28	19.21	5.74	4.38	5.12	4.15	3.66	10.19	13.44	22.32	22.66	13.55	24.12
Leptodactylus mystacinus	MZUSP 140955	UHE Corumbá; Goiás; Brazil	Male	55.07	20.08	18.7	6.1	4.33	5.18	3.73	3.33	11.81	12.87	23.81	23.98	13.72	24.07
Leptodactylus mystacinus	MZUSP 140956	UHE Corumbá; Goiás; Brazil	Male	53.13	21.19	19.51	5.02	4.18	4.65	3.39	3.65	9.64	13.28	24.06	23.8	13.69	24.48
Leptodactylus mystacinus	MZUSP 140958	UHE Corumbá; Goiás; Brazil	Male	57.14	21.02	19.56	5.49	5.16	5.29	3.81	3.59	12.28	12.92	24.8	25.64	13.69	24.86
Leptodactylus mystacinus	MZUSP 140961	UHE Corumbá; Goiás; Brazil	Male	54.06	20.41	17.9	5.27	4.42	4.98	3.03	3.5	9.96	12.03	20.98	22.95	13.27	22.58
Leptodactylus mystacinus	MZUSP 140961	UHE Corumbá; Goiás; Brazil	Male	54.26	20.2	18.52	5.62	4.83	5.48	4.03	NA	11.69	11.29	21.99	23.54	13.69	23.51
Leptodactylus mystacinus	MZUSP 140969	UHE Corumbá; Goiás; Brazil	Male	56.67	21.92	21.43	4.57	5.15	5.59	3.99	NA	12.21	13.06	22.57	24.31	12.6	25.59
Leptodactylus mystacinus	MZUSP 140970	UHE Corumbá; Goiás; Brazil	Male	60.53	22.79	21.26	6.37	5.49	5.79	3.65	3.49	11.18	13.55	25.7	26.46	14.93	27.64
Leptodactylus mystacinus	MZUSP 140978	UHE Corumbá; Goiás; Brazil	Male	54.67	21.02	19.22	5.92	4.33	5.05	3.45	3.52	10.78	11.87	22.12	23.51	12.01	23.36
Leptodactylus mystacinus	MZUSP 140982	UHE Corumbá; Goiás; Brazil	Male	52.89	19.69	19.57	6	4.3	4.51	3.83	3.61	12	10.19	21.74	23	12.94	23.71
Leptodactylus mystacinus	MZUSP 140983	UHE Corumbá; Goiás; Brazil	Male	46.68	17.45	16.44	4.95	3.98	4.32	4.19	NA	10.32	12.35	21.89	23.5	12.07	23.43
Leptodactylus mystacinus	MZUSP 141806	Tesouro; Mato Grosso; Brazil	Male	51.63	18.53	17.1	5.34	4.17	4.8	3.48	3.53	10.49	11.35	20.56	21.13	13.04	22.58
Leptodactylus mystacinus	MZUSP 141808	Tesouro; Mato Grosso; Brazil	Male	58.14	21.03	19.78	6.36	4.58	5.09	4.25	4.3	10.9	12.74	24.2	23.08	13.17	24.2
Leptodactylus mystacinus	MZUSP 141809	Tesouro; Mato Grosso; Brazil	Male	58.84	21.19	20.55	6.1	5.02	5.41	4.12	NA	10.69	12.66	24	23.93	13.95	23.92
Leptodactylus mystacinus	MZUSP 142474	Aiuruoca; Minas Gerais; Brazil	Male	54.56	20.51	18.36	5.06	4.48	5.01	3.54	3.57	8.55	11.4	20.95	21.96	12.56	22.61
Leptodactylus mystacinus	MZUSP 142811	Cachoeira do Itapemirim; Espiritu Santo; Brazil	Male	57.04	22.29	20.62	6.09	4.61	5.28	3.71	4.09	13	11.94	24.31	23.81	13.34	23.95
Leptodactylus mystacinus	MZUSP 143917	Limeira; São Paulo; Brazil	Male	47.78	18.42	17.12	5.62	4.7	4.97	3.63	3.3	10.73	11.28	22.31	21.95	11.91	22.69
Leptodactylus mystacinus	MZUSP 143927	Jaguariúna; São Paulo; Brazil	Male	51.96	20.36	17.78	5.43	4.62	4.82	3.77	3.36	10.48	11.37	22.6	22.81	13.01	22.77
Leptodactylus mystacinus	MZUSP 145678	Luziania; Goiás; Brazil	Male	51.79	19.05	17.5	6.27	4.43	4.14	3.57	3.98	8.85	11.82	22.23	21.66	11.89	23.4
Leptodactylus mystacinus	MZUSP 145679	Luziania; Goiás; Brazil	Male	57.42	20.21	20.55	6.79	4.65	4.75	4.27	4.47	9.18	13.01	23.56	24.31	11.92	25.23
Leptodactylus mystacinus	MZUSP 148939	Vila Bela da Santisima Tindade; Mato Grosso; Brazil	Male	55.46	20.34	19.12	6.44	4.36	4.65	3.18	3.81	9.89	13.26	21.95	23.64	13.07	24.77
Leptodactylus mystacinus	MZUSP 148940	Vila Bela da Santisima Tindade; Mato Grosso; Brazil	Male	59.56	22.89	20.86	6.49	4.92	5.6	3.58	3.99	10.7	14.64	23.57	26.14	13.91	20.85
Leptodactylus mystacinus	MZUSP 148941	Vila Bela da Santisima Tindade; Mato Grosso; Brazil	Male	54.93	21.96	21.3	6.28	4.81	5.11	4.37	4.14	11.71	13.95	24.31	24.87	14.31	25.73
Leptodactylus mystacinus	MZUSP 149704	Marliéria; Minas Gerais; Brazil	Male	56.15	21.64	20.14	6	4.66	5.38	4.02	NA	9.98	14.09	26.83	26.26	14.09	25.88
Leptodactylus mystacinus	MZUSP 152112	Alto Taquarí; Mato Grosso; Brazil	Male	52.11	19.89	19.25	5.86	4.3	4.77	4.21	4.5	9.33	12.17	20.52	22.15	11.36	24.47
Leptodactylus mystacinus	MZUSP 154604	Santa Barbara; São Paulo; Brazil	Male	53.43	19.91	18.92	6.54	4.9	4.45	4.01	3.67	8.6	12.36	24.56	23.05	13.27	24.18
Leptodactylus mystacinus	MZUSP 154605	Santa Barbara; São Paulo; Brazil	Male	53.39	20.61	19.25	5.78	5.15	5.35	3.8	3.55	9.99	13.13	24.05	24.24	13.8	24.14
Leptodactylus mystacinus	UFRGS 0755	Cachoeira do sul; Rio Grande do Sul; Brazil	Male	47.69	19.33	17.91	4.67	3.97	5	3.56	3.58	8.95	13.06	22.05	22.7	12.62	23.75
Leptodactylus mystacinus	UFRGS 1394	Nonoai; Rio Grande do Sul; Brazil	Male	53.84	21.8	18.9	5.13	4.44	4.72	3.66	3.94	9.85	13.46	24.32	23.98	14.08	26.05
Leptodactylus mystacinus	UFRGS 2640	Lavras; Rio Grande do Sul; Brazil	Male	48.83	19.81	18.29	5.86	3.89	4.37	3.56	3.76	9.16	12.59	23.22	22.53	11.63	23.56
Leptodactylus mystacinus	UFRGS 2663	Amaral Fenador; Rio Grande do Sul; Brazil	Male	51.56	17.01	15	4.39	3.47	4.12	3.4	3.68	6.84	10.05	17.61	17.26	NA	18.67
Leptodactylus mystacinus	UFRGS 2722	Alegrete; Rio Grande do Sul; Brazil	Male	47.18	19.06	18.54	5.12	3.84	3.89	3.35	3.83	9.6	9.64	21.66	22.48	12.14	21.87
Leptodactylus mystacinus	UFRGS 2856	Santana do Livramento; Rio Grande do Sul; Brazil	Male	46.78	18.42	16.74	4.45	3.93	4.59	3.52	3.56	10.08	9.71	20.61	20.46	11.02	20.45
Leptodactylus mystacinus	UFRGS 2878	Santana do Livramento; Rio Grande do Sul; Brazil	Male	47.24	19.08	15.69	5.04	3.71	4.76	4.01	NA	9.48	10.26	20.15	20.15	11.51	20.38
Leptodactylus mystacinus	UFRGS 3390	Cerro Largo; Rio Grande do Sul; Brazil	Male	52.66	19.87	18.43	4.87	4.17	4.91	3.52	3.75	10.45	11.77	22.26	23.28	13.55	23.11
Leptodactylus mystacinus	UFRGS 3737	Santana do Livramento; Rio Grande do Sul; Brazil	Male	51.25	19.47	16.64	5.57	4.3	4.62	3.16	3.41	10.66	12.68	20.48	21.25	11.4	22.7
Leptodactylus mystacinus	UFRGS 3738	Santana do Livramento; Rio Grande do Sul; Brazil	Male	50.64	19.03	17.27	4.92	4.04	4.8	3.73	3.53	9.62	13.26	20.73	21.73	12.13	22.26
Leptodactylus mystacinus	UFRGS 3739	Santana do Livramento; Rio Grande do Sul; Brazil	Male	55.54	20.34	19.05	4.79	4.58	5.26	3.89	3.65	11.1	12.28	21.88	23.13	13.15	23.41
Leptodactylus mystacinus	UFRGS 3740	Santana do Livramento; Rio Grande do Sul; Brazil	Male	56.48	20.44	18.14	5.03	4.5	4.61	3.59	3.6	9.82	12.37	22.03	23.33	14.67	23.56
Leptodactylus mystacinus	UFRGS 3885	Pelotas; Rio Grande do Sul; Brazil	Male	46.28	18.22	16.36	4.93	3.14	4.75	3.43	3.51	10.01	11.64	19.51	21.75	11.97	21.22
Leptodactylus mystacinus	UFRGS 4247	Manoel viana; Rio Grande do Sul; Brazil	Male	50.15	19.07	16.45	5.05	4.14	4.59	3.05	3.87	10.62	11.36	20.29	21.25	12.11	22.12
Leptodactylus mystacinus	UFRGS 4339	Derrubadas; Rio Grande do Sul; Brazil	Male	48.55	17.78	16.94	4.77	4.06	4.58	3.58	3.45	7.83	11.88	19.92	21.03	12.44	22.14
Leptodactylus mystacinus	UFRGS 4340	Derrubadas; Rio Grande do Sul; Brazil	Male	52.25	21.1	18.21	5.47	4.3	4.86	3.82	3.42	10.16	11.77	20.81	22.81	13.42	22.96
Leptodactylus mystacinus	UFRGS 4450	Manoel Viana; Rio Grande do Sul; Brazil	Male	52.12	20.1	17.98	5.58	4.14	4.42	3.4	3.69	9.39	12.03	22.13	21.42	11.7	21.77
Leptodactylus mystacinus	UFRGS 5117	Guaporé; Rio Grande do Sul; Brazil	Male	52.53	20.05	17.76	5.03	4.05	5.29	3.25	3.79	10.08	12.16	21.3	22.15	11.91	24.15
Leptodactylus mystacinus	UFRGS 5177	Arboredo; Santa Catarina; Brazil	Male	54.17	19.96	18.53	5.23	4.72	5.11	3.25	3.74	9.39	12.3	22.87	24.24	13.18	23.6
Leptodactylus mystacinus	UFRGS 5341	São Lorenco; Rio Grande do Sul; Brazil	Male	51.21	18.61	16.44	5.74	4.09	4.32	2.83	3.5	9.4	10.66	21.66	19.94	10.68	21.19
Leptodactylus mystacinus	UFRGS 5369	São Lorenco; Rio Grande do Sul; Brazil	Male	53.11	20.5	17.94	5.22	3.6	4.32	3.38	3.6	10.67	11.34	21.21	21.72	11.74	21.96
Leptodactylus mystacinus	UFRGS 7168	Itá; Santa Catarina; Brazil	Male	51.56	17.15	15.35	4.49	4.56	4.81	3.39	4.23	9.57	10.71	19.55	20.08	11.66	22.44
Leptodactylus mystacinus	ZUFSM 00087	Santa María; Rio Grande do Sul; Brazil	Male	46.37	19.92	16.64	5.7	3.37	4.22	2.95	2.93	9.92	11.79	19.27	20.41	11.93	21.83
Leptodactylus mystacinus	ZUFSM 00335	Santa María; Rio Grande do Sul; Brazil	Male	46.4	18.06	16.56	4.55	4	4.77	3.27	3.3	7.73	11.16	18.9	20.23	11.13	20.79
Leptodactylus mystacinus	ZUFSM 00373	Santa María; Rio Grande do Sul; Brazil	Male	47.48	19.48	17.04	5.13	3.63	4.11	3.8	2.95	8.48	11.46	18.6	20.51	10.61	21.86
Leptodactylus mystacinus	ZUFSM 00384	Santa María; Rio Grande do Sul; Brazil	Male	47.05	18.3	16.49	5.18	3.77	4.09	3.22	3.03	9.99	12.37	19.4	19.98	10.86	23.07
Leptodactylus mystacinus	ZUFSM 00452	Santa María; Rio Grande do Sul; Brazil	Male	46.95	18.57	18.3	5.56	3.88	4.34	3.55	3.2	10.69	10.97	18.61	20.93	11.66	23.34
Leptodactylus mystacinus	ZUFSM 00611	Santa María; Rio Grande do Sul; Brazil	Male	51.56	18.33	16.78	5.29	3.79	4.08	2.98	2.88	10.19	10.75	20.16	20.24	10.73	21.05
Leptodactylus mystacinus	ZUFSM 00651	Santa María; Rio Grande do Sul; Brazil	Male	49.1	18.76	17.63	5.47	3.77	4.59	3.35	3.09	10.91	11.22	20.72	21.77	11.96	22.97
Leptodactylus mystacinus	ZUFSM 00668	Santa María; Rio Grande do Sul; Brazil	Male	47.26	20.23	17.79	4.58	3.87	4.83	3.39	3.66	9.44	11	20.29	22.68	12.04	23.72
Leptodactylus mystacinus	ZUFSM 00707	Santa María; Rio Grande do Sul; Brazil	Male	53.27	19.85	19.6	4.83	4.03	5.01	4.07	NA	10.93	10.85	19.04	22.41	13.07	23.38
Leptodactylus mystacinus	ZUFSM 00907	Santa María; Rio Grande do Sul; Brazil	Male	52.07	20.94	19.28	5.48	4.24	4.62	3.65	3.02	8.89	13.4	20.36	23.73	13.49	21.91
Leptodactylus mystacinus	ZUFSM 01622	Santa María; Rio Grande do Sul; Brazil	Male	49.08	19.07	18.25	5.55	3.99	4.67	3.28	4.01	9.06	12.5	20.9	22.05	11.45	22.9
Leptodactylus mystacinus	ZUFSM 01668	Santa María; Rio Grande do Sul; Brazil	Male	49.42	20.88	18.71	5.68	4.17	4.95	3.2	3.53	9.44	13.28	19.55	22.45	13.22	23.72
Leptodactylus mystacinus	ZUFSM 01715	Santa María; Rio Grande do Sul; Brazil	Male	51.01	19.96	17.65	5.28	4	4.39	3.34	2.89	9.64	11.87	21.68	22.46	11.44	23.22
Leptodactylus mystacinus	ZUFSM 02370	Itá; Santa Catarina; Brazil	Male	55.83	23.84	19.77	5.49	4.88	5.42	4.22	4.05	9.34	14.14	22.5	24.26	13.12	25.85
Leptodactylus mystacinus	ZUFSM 02371	Itá; Santa Catarina; Brazil	Male	54.62	21.07	19.8	5.58	4.54	4.88	3.97	3.89	8.86	12.44	21.69	24.12	11.99	24.69
Leptodactylus mystacinus	ZUFSM 02432	Manoel Viana; Rio Grande do Sul; Brazil	Male	52.4	20.27	19.78	5.42	3.98	4.76	3.71	3.44	8.37	11.8	20.71	21.86	11.57	21.11
Leptodactylus mystacinus	ZUFSM 03008	Dom Feliciano; Rio Grande do Sul; Brazil	Male	46.86	18.5	16.04	5.67	3.77	4.46	2.82	2.47	8.74	11.46	16.85	20.38	11.3	20.59
Leptodactylus mystacinus	ZUFSM 03010	Dom Feliciano; Rio Grande do Sul; Brazil	Male	47.52	20.05	16.7	5.44	4.18	4.42	3.11	2.44	9.18	11.39	17.93	21.56	10.27	22.2
Leptodactylus mystacinus	ZUFSM 03011	Dom Feliciano; Rio Grande do Sul; Brazil	Male	45.72	18.53	15.84	5.64	3.64	3.54	3.76	3.33	8.54	10.86	16.4	20.1	10.56	20.17
Leptodactylus mystacinus	ZUFSM 03012	Dom Feliciano; Rio Grande do Sul; Brazil	Male	47.19	19.64	16.85	4.94	3.85	4.43	3.58	2.91	8.26	11.13	17.9	20.06	10.36	21.3
Leptodactylus mystacinus	ZUFSM 03013	Dom Feliciano; Rio Grande do Sul; Brazil	Male	45.93	19.52	16.83	5.47	3.79	4.58	3.1	3.64	7.96	11.19	16.98	19.97	10.86	20.79
Leptodactylus mystacinus	ZUFSM 03126	Santa María; Rio Grande do Sul; Brazil	Male	46.86	18.97	17.51	6.19	4.09	4.16	3.21	2.97	9.49	12.19	21	21.12	11.79	23.75
Leptodactylus mystacinus	ZUFSM 04066	Pinhal Grande; Rio Grande do Sul; Brazil	Male	51.46	22.14	19.09	5.64	4.11	4.6	3.77	3.23	9.87	12.41	21.54	21.74	12.51	24.19
Leptodactylus mystacinus	ZUFSM 04086	Ibarama; Rio Grande do Sul; Brazil	Male	53.51	20.37	18.38	6.1	4.18	4.45	3.77	3.74	9.87	13.18	19.69	21.32	12.03	24.51
Leptodactylus mystacinus	ZUFSM 04157	Santa María; Rio Grande do Sul; Brazil	Male	50.45	20.86	17.91	5.81	3.95	4.42	3.36	3.53	10.42	12.03	20.11	21.26	12.43	22.63
Leptodactylus mystacinus	ZUFSM 04268	Ibarama; Rio Grande do Sul; Brazil	Male	53.07	19.13	17.94	5.23	3.57	4.49	3.32	3.6	8.69	11.91	19.13	19.97	11.98	22.98
Leptodactylus mystacinus	ZUFSM 04289	São Francisco de Assis; Rio Grande do Sul; Brazil	Male	52.64	21.43	18.81	6.25	3.98	4.99	3.68	3.89	10.25	12.93	22.83	23.02	12.01	23.8
Leptodactylus mystacinus	ZUFSM 04401	Campo Novo; Rio Grande do Sul; Brazil	Male	52.4	20	17.62	4.81	4.06	5.03	3.52	3.72	8.27	13.34	20.29	22.41	11.87	22.79
Leptodactylus mystacinus	ZUFSM 04526	Derrubadas; Rio Grande do Sul; Brazil	Male	55.57	22.95	19.64	5.86	4.82	4.76	3.62	4.14	9.74	12.82	23.84	23.32	12.31	24.69
Leptodactylus mystacinus	ZUFSM 04592	Derrubadas; Rio Grande do Sul; Brazil	Male	54.46	21.32	18.93	5.96	5.16	4.15	4.5	NA	10.07	12.9	23.33	24.46	12.58	25.32
Leptodactylus mystacinus	ZUFSM 04730	São Gabriel; Rio Grande do Sul; Brazil	Male	51.99	21.49	18.98	5.38	4.21	4.62	3.47	3.38	11.93	11.61	24.21	22.7	12.07	23.22
Leptodactylus mystacinus	ZUFSM 04740	São Gabriel; Rio Grande do Sul; Brazil	Male	48.86	17.78	16.24	4.5	3.62	4.16	3.82	3.59	7.99	10.79	20.86	20.27	11.5	21.3
Leptodactylus mystacinus	ZUFSM 05196	Caçapava do Sul; Rio Grande do Sul; Brazil	Male	50.7	19.79	17.99	4.56	3.9	4.8	3.15	4.12	9.75	11.83	19.49	21.41	12.07	21.9
Leptodactylus mystacinus	ZUFSM 08164	Caçapava do Sul; Rio Grande do Sul; Brazil	Male	49.25	19.47	16.93	4.29	3.56	4.66	3.22	3.57	7.55	9.99	18.35	19.9	10.81	21.2
Leptodactylus mystacinus	ZUFSM 08460	Santana do Livramento; Rio Grande do Sul; Brazil	Male	52.35	21.61	19.52	5.9	4.14	4.91	3.72	3.56	8.54	12.07	24.29	23.18	11.57	23.22
Leptodactylus mystacinus	ZUFSM 08461	Santana do Livramento; Rio Grande do Sul; Brazil	Male	51.93	20.15	18.99	5.54	4.26	4.32	4.42	3.6	8.89	12.85	22.1	22.94	11.91	24.09
Leptodactylus mystacinus	ZUFSM 08462	Santana do Livramento; Rio Grande do Sul; Brazil	Male	49.97	19.55	17.24	5.21	3.71	4.75	3.18	3.57	8.02	13.2	21.46	21.33	11.16	22.74
Leptodactylus mystacinus	ZUFSM 08464	Santana do Livramento; Rio Grande do Sul; Brazil	Male	53.55	20.57	19.53	5.56	4.21	5.13	3.83	3.63	8.89	13.27	23.16	21.85	11.87	21.94
Leptodactylus mystacinus	ZUFSM 09400	São Gabriel; Rio Grande do Sul; Brazil	Male	54.64	20.88	19.39	5.12	4.05	4.94	3.78	3.2	9.35	12.96	23.18	23.26	12.37	22.66
Leptodactylus mystacinus	ZUFSM 09432	São Gabriel; Rio Grande do Sul; Brazil	Male	50.03	19.26	16.28	5.24	4.05	5.06	3.41	3.72	8.66	12.98	21.85	21.67	11.48	23.34
Leptodactylus mystacinus	ZUFSM 09437	São Gabriel; Rio Grande do Sul; Brazil	Male	50.82	19.67	16.93	4.9	3.97	5.02	3.66	4.01	8.64	12.96	24.36	22.38	13.1	22.79
Leptodactylus mystacinus	ZUFSM 09495	São Gabriel; Rio Grande do Sul; Brazil	Male	53.65	21.51	19.2	4.96	4.44	5.39	3.79	3.57	10.18	13.05	23.42	12.5	24.32	12.67
Leptodactylus mystacinus	ZUFSM 09500	São Gabriel; Rio Grande do Sul; Brazil	Male	51.39	19.87	17.4	4.84	3.91	5.22	3.58	3.8	9.02	11.93	20.2	18.87	11.14	21.57
Leptodactylus mystacinus	ZUFSM 09509	São Gabriel; Rio Grande do Sul; Brazil	Male	54.93	20.92	18.95	4.88	4.1	4.86	3.78	3.87	9.69	13.9	24.19	23.71	13.44	25.59
Leptodactylus mystacinus	ZUFSM 09513	São Gabriel; Rio Grande do Sul; Brazil	Male	56.57	20.66	17.93	5.63	3.94	5.36	3.43	3.52	9.35	14.32	22.2	23.02	11.79	24.33
Leptodactylus mystacinus	ZUFSM 09673	São Gabriel; Rio Grande do Sul; Brazil	Male	51.56	18.7	16.93	5.36	3.61	4.95	3.43	3.59	7.85	11.52	20.38	20.47	10.73	20.3
Leptodactylus mystacinus	ZUFSM 09686	São Gabriel; Rio Grande do Sul; Brazil	Male	45.14	19.58	17.22	5.61	3.79	3.67	3.07	3.2	8.38	11.97	20.94	20.71	11.28	21.99
Leptodactylus mystacinus	ZUFSM 10459	São Gabriel; Rio Grande do Sul; Brazil	Male	48.99	19.95	17	5.04	3.33	4.96	3.29	2.81	9.2	12.26	23.23	22.07	11.08	16.88
Leptodactylus mystacinus	ZUFSM 10562	Lavras do Sul; Rio Grande do Sul; Brazil	Male	49.3	20.77	17.02	5.21	3.91	4.8	3.09	2.83	8.81	11.69	21.69	21.76	11.53	22.08
Leptodactylus mystacinus	ZUFSM 10564	Lavras do Sul; Rio Grande do Sul; Brazil	Male	52.18	20.69	18.64	5.44	4.08	4.94	3.37	3.01	8.75	13.27	22.59	21.8	11.46	24.13
Leptodactylus mystacinus	ZUFSM 10565	Lavras do Sul; Rio Grande do Sul; Brazil	Male	50.08	20.98	17.9	5.5	4.02	5.11	3.97	3.2	9.57	11.53	21.58	21.32	12.64	22.95
Leptodactylus mystacinus	ZUFSM 10614	Jaguarão; Rio Grande do Sul; Brazil	Male	49.63	20.04	18.01	5.01	3.78	4.42	3.36	3.84	9.44	12.37	23.04	22.21	12.46	22.45
Leptodactylus mystacinus	ZUFSM 11406	São Rafael; Rio Grande do Sul; Brazil	Male	53.34	20.77	18.1	5.34	3.81	4.74	3.02	3.09	9.21	12.37	20.96	22.07	11.73	23.99
Leptodactylus mystacinus	ZUFSM 11426	São Rafael; Rio Grande do Sul; Brazil	Male	55.76	20.33	19.65	6.1	4.5	4.79	3.23	4.51	10.25	12.78	22.15	11.87	11.65	22.82
Leptodactylus mystacinus	ZUFSM 11548	São Rafael; Rio Grande do Sul; Brazil	Male	48.32	19.56	17.74	4.84	3.68	4.46	2.89	4.35	7.93	12.5	18.76	20.34	11.52	23.14
Leptodactylus mystacinus	ZUFSM 11556	São Rafael; Rio Grande do Sul; Brazil	Male	51.56	17.43	15.77	4.83	3.48	4.38	3.32	3.99	7.4	11.17	18.11	19.66	9.93	20.8
Leptodactylus mystacinus	ZUFSM 11587	São Luiz Gonzaga; Rio Grande do Sul; Brazil	Male	48.54	19.11	18.23	5.35	4.07	4.55	3.37	4.32	10.33	10.55	24.03	23.1	12.95	22.79
Leptodactylus mystacinus	ZUFSM 11720	São Gabriel; Rio Grande do Sul; Brazil	Male	51.51	20.4	17.4	4.74	4.24	4.87	3.77	3.56	8.06	12.97	21.62	21.87	13.06	22.86
Leptodactylus mystacinus	CFBH 03845	São Domingos; Santa Catarina; Brazil	Female	58.15	23.4	21.58	6.5	5.56	5.85	4.49	4.41	10.22	13.44	26.11	26.13	13.34	25.55
Leptodactylus mystacinus	CFBH 05540	Mucuri; Bahia; Brazil	Female	59.35	22.23	20.88	6.28	4.61	4.92	3.52	4.37	11.21	13.98	24.45	24.08	11.84	24.97
Leptodactylus mystacinus	CFBH 06432	Rio Claro; São Paulo; Brazil	Female	53.88	20.74	18.39	5.65	4.38	4.97	3.79	4.46	9.6	13.16	23.06	24.41	13.62	23.61
Leptodactylus mystacinus	CFBH 06434	Rio Claro; São Paulo; Brazil	Female	53.68	22.08	19.16	5.17	2.66	5.09	3.36	4.34	9.54	12.05	22.51	23.7	12.14	24.3
Leptodactylus mystacinus	CFBH 06518	Itirapina; São Paulo; Brazil	Female	55.3	21.69	18.71	5.19	4.55	3.74	3.78	3.66	10.13	12.22	23.12	24.74	13.27	25.03
Leptodactylus mystacinus	CFBH 09797	Itirapina; São Paulo; Brazil	Female	55.31	21.1	18.11	5.68	5	5.82	3.69	3.84	8.04	12.81	23.72	24.4	13.62	24.08
Leptodactylus mystacinus	CFBH 09995	Santana do Parnaíba; São Paulo; Brazil	Female	58.87	24.36	19.28	6.64	3.68	4.75	4.21	4.79	10.06	13.18	25.64	23.87	14.07	24.54
Leptodactylus mystacinus	CFBH 10222	Grão Mogol; Minas Gerais; Brazil	Female	53.41	20.9	18.61	6.51	4.68	4.94	3.52	3.42	8.61	12.2	21.87	22.22	12.1	23.38
Leptodactylus mystacinus	CFBH 13621	Campos Novos; Santa Catarina; Brazil	Female	62.31	23.76	20.13	5.5	5.37	5.52	3.88	4.43	9.76	12.28	26.02	24.58	14.56	25.88
Leptodactylus mystacinus	CFBH 18386	Teodoro Sampaio; São Paulo; Brazil	Female	57.37	22.07	19.5	5.84	4.72	4.85	4.28	3.14	9.56	13.62	22.72	23.89	13.58	24.39
Leptodactylus mystacinus	CFBH 19438	Linhares; Espiritu Santo; Brazil	Female	56.92	22.66	21.55	5.83	4.97	5.51	4.21	3.5	10.14	14.35	22.74	24.18	14.61	24.68
Leptodactylus mystacinus	CFBH 19610	Três Lagoas; Mato Grosso do Sul; Brazil	Female	59.2	22.86	21.08	5.37	5.6	5.16	4.56	4.39	11.76	12.86	NA	25.07	13.24	13.26
Leptodactylus mystacinus	CFBH 26089	São Carlos; São Paulo; Brazil	Female	58.69	21.12	18.43	5.69	4.46	5.11	3.61	3.82	11.87	13.43	NA	25.73	14.52	25.34
Leptodactylus mystacinus	CFBH 26118	Palmeiras de Goiás; Goias; Brazil	Female	61.52	22.68	21.59	5.74	5.71	5.5	4.6	NA	10.01	14.67	23.21	25.99	13.67	24.33
Leptodactylus mystacinus	CFBH 30127	Palmeiras; Bahia; Brazil	Female	56.05	20.92	20.19	6.28	4.17	4.71	3.77	4.94	8.92	14.27	23.18	22.57	11.97	22.54
Leptodactylus mystacinus	CFBH 33113	Luis Antônio; São Paulo; Brazil	Female	55.6	21.81	18.46	4.89	4.24	5.26	3.88	3.86	9.25	12.44	24.07	23.14	12.58	24.45
Leptodactylus mystacinus	CFBH 38859	Santa Rita do Passa Quatro; São Paulo; Brazil	Female	55.8	25	20.66	6.1	5.15	5.32	2.64	5.17	12.81	12.58	26.16	26.21	15.72	26.83
Leptodactylus mystacinus	CFBH 42770	Teresópolis; Rio de Janeiro; Brazil	Female	52.55	19.2	16.98	5.14	4.08	4.64	3.58	4.17	10.05	11.37	22.47	22.01	11.78	21.91
Leptodactylus mystacinus	CFBH 43297	Patrocínio Paulista; São Paulo; Brazil	Female	60.15	23.35	21.37	5.89	5.16	5.57	4.03	3.88	12.03	12.02	24.67	25.71	11.9	24.48
Leptodactylus mystacinus	CFBH 43387	São Joaquim da Barra; São Paulo; Brazil	Female	56.68	23.25	19.61	5.17	4.6	5.38	4.34	3.9	12.47	12.37	24.22	25.3	13.96	23.95
Leptodactylus mystacinus	IIBP 0050	Reserva Mbaracayú; Canindeyú; Paraguay	Female	54.38	20.13	19.41	5.19	4.24	5.49	4.11	4.42	8.95	14.21	24.57	25.14	13.8	25.39
Leptodactylus mystacinus	LGE 00015	Posadas; Misiones; Argentina	Female	49.92	17.08	18.37	5.92	5.22	5.36	3.84	3.59	8.08	11.55	20.99	21.57	10.89	21.41
Leptodactylus mystacinus	LGE 00419	Río Tercero; Córdoba; Argentina	Female	52.05	16.82	18.27	5.07	4.48	4.52	3.9	3.31	9.06	12.21	22.14	22.6	11.96	21.46
Leptodactylus mystacinus	LGE 03873	Garupá; Misiones; Argentina	Female	51.28	18.11	18.54	4.97	4.5	5.06	3.75	4.3	9.24	12.07	22.56	23.24	12.25	23.59
Leptodactylus mystacinus	LGE 03961	Dos Hermanas; Misiones; Argentina	Female	50.65	17.57	18.27	4.86	4.38	5.78	4.38	4.18	8.26	12.72	23.32	22.35	11.91	23.44
Leptodactylus mystacinus	LGE 03995	PN Iguazí; Misiones; Argentina	Female	52.85	18.31	18.72	5.64	5.14	5.46	4.41	3.03	9.81	12.66	22.1	25.63	14.47	24.26
Leptodactylus mystacinus	LGE 03996	RNE San Antonio; Misiones; Argentina	Female	52.82	17.26	20.13	5.33	4.26	5.35	4.38	3.93	11.2	13.37	23.55	25.47	15.23	24.68
Leptodactylus mystacinus	LGE 03997	PN Iguazí; Misiones; Argentina	Female	59.85	19.04	19.48	5.64	5.11	5.6	4.37	5.29	9.39	12.81	20.5	26.1	13.47	24.09
Leptodactylus mystacinus	LGE 04237	Villa Bonita; Misiones; Argentina	Female	64.25	20.56	21.53	6.12	5.71	5.33	5.27	4.37	10.01	13.52	NA	23.09	14.31	25.61
Leptodactylus mystacinus	LGE 04260	Villa Bonita; Misiones; Argentina	Female	57.48	19.32	20.42	5.73	5.43	5.78	4.22	3.58	10.11	11.99	NA	22.27	12.84	24
Leptodactylus mystacinus	LGE 04677	Puerto Libertad; Misiones; Argentina	Female	56.32	19.57	20.24	5.68	5.1	5.43	4.51	4.24	9.79	13.99	24.16	23.97	14.47	25.17
Leptodactylus mystacinus	LGE 05123	Campo Arminda; Misiones; Argentina	Female	54.06	19.36	20.23	6.11	5.31	5.33	4.6	3.95	9.21	14.36	24.11	25.71	13.96	26.41
Leptodactylus mystacinus	LGE 06813	PN Iguazí; Misiones; Argentina	Female	56.95	19.69	20.21	5.2	5.03	5.93	2.87	4.61	11.58	13.03	21.91	25.05	14.53	24.78
Leptodactylus mystacinus	LGE 06852	PN Iguazí; Misiones; Argentina	Female	54.56	18.86	20.35	5.55	5.24	5.03	4.12	3.99	9.55	12.95	22.95	25.46	14.37	24.61
Leptodactylus mystacinus	LGE 06914	Puerto Libertad; Misiones; Argentina	Female	53.99	18.99	18.14	5.7	4.79	5.43	4.62	4.41	8.95	12.82	23	24.2	12.92	23.51
Leptodactylus mystacinus	LGE 06936	PN Iguazí; Misiones; Argentina	Female	55.64	18.21	19.65	5.92	5.99	5.04	4.39	3.29	9.52	13.83	23.32	25.45	13.52	25.89
Leptodactylus mystacinus	LGE 06944	Puerto Libertad; Misiones; Argentina	Female	53.43	18.66	19.78	4.99	5.13	5.52	4.15	3.83	8.5	13.87	24.49	24.23	12.81	25.7
Leptodactylus mystacinus	LGE 06946	Puerto Libertad; Misiones; Argentina	Female	55	18.54	19.62	4.72	4.15	5.47	5.02	3.46	9.71	12.97	23.93	24.77	13.75	24.47
Leptodactylus mystacinus	LGE 06955	PN Iguazí; Misiones; Argentina	Female	54.52	19.38	19.24	5.43	5.08	5.36	4.17	3.75	8.98	13.22	23.03	25	13.08	25.48
Leptodactylus mystacinus	LGE 06965	PN Iguazí; Misiones; Argentina	Female	59.13	20.18	20.56	4.84	5.37	5.58	4.52	3.83	12.1	11.84	24.86	25.26	14.58	26.17
Leptodactylus mystacinus	LGE 07063	Santiago de Liniers; Misiones; Argentina	Female	53.5	18.95	18.99	5.37	5.04	5.5	4.12	3.76	11.45	13.65	22.7	25.4	13.7	25.64
Leptodactylus mystacinus	LGE 07606	Paraje Macaca; Misiones; Argentina	Female	54.81	18.41	19.09	5.39	4.53	4.8	4.37	3.76	9.05	12.66	23.4	23.46	12.23	25.07
Leptodactylus mystacinus	LGE 07903	Puerto Panambí; Misiones; Argentina	Female	50.56	17.07	17.68	5.27	4.2	4.58	4.2	3.46	10.09	11.93	23.86	23.18	12.26	23.02
Leptodactylus mystacinus	LGE 07929	Andresito; Misiones; Argentina	Female	58.21	18.77	18.42	5.02	5.11	5.38	4.21	3.11	10.6	13.12	17.27	22.7	14.5	23.61
Leptodactylus mystacinus	LGE 10541	Minaçu; Goias; Brazil	Female	45.47	14.79	16.34	4.7	4.16	4.83	3.97	2.83	7.52	11.38	17.47	19.74	11.3	20.47
Leptodactylus mystacinus	LGE 10542	Minaçu; Goias; Brazil	Female	63	20.79	22.62	6.07	4.31	5.78	5.13	4.09	10.9	14.23	24.25	25.69	14.71	24.83
Leptodactylus mystacinus	LGE 10544	Dom Pedrito ; Rio Grande do Sul; Brazil	Female	45.5	14.81	16.45	4.74	3.65	4.44	3.31	3.36	9.52	11	18.97	24.52	13.26	21.25
Leptodactylus mystacinus	LGE 12410	Reserva Biosfera Yabotí; Misiones; Argentina	Female	60.54	19.47	20.32	5.37	4.83	6.07	4.77	4.17	10.67	14.08	25.78	25.99	15.28	25.8
Leptodactylus mystacinus	LGE 14993	Andresito, Estancia La Blanquita; Misiones; Argentina	Female	56.35	19.84	18.46	5.62	5.14	5.47	4.45	3.68	11.04	13.15	19.1	22.72	14.02	26.05
Leptodactylus mystacinus	LGE 14999	Tanti, Villa Flor Serrana, Río Toro Muerto; Córdoba; Argentina	Female	54.54	18.1	18.56	4.88	4.01	5.01	3.99	3.17	8.24	12.55	22.45	21.71	21.72	21.81
Leptodactylus mystacinus	LGE 15203	Chajarí; Entre Rios; Argentina	Female	50.94	17.39	18.29	5.22	4.41	5.21	4.17	4.99	11.11	11.49	22.76	23.25	12.95	22.96
Leptodactylus mystacinus	LGE 15205	Chajarí; Entre Rios; Argentina	Female	53.11	16.92	19.47	5.86	4.03	4.96	3.55	3.53	11.07	12.19	22.99	23.21	14.02	22.62
Leptodactylus mystacinus	LGE 15208	Chajarí; Entre Rios; Argentina	Female	50.21	17.13	17.95	5.66	4.46	4.91	3.58	2.96	9.47	11.35	22.84	22.1	12.81	22.37
Leptodactylus mystacinus	LGE 15213	Aristobulo del Valle, Balneario del Arroyo Cuña Pirú; Misiones; Argentina	Female	57.12	18.5	19.89	5.68	4.29	4.97	4.63	3.32	8.88	12.76	23.58	25.04	12.57	23.61
Leptodactylus mystacinus	LGE 15223	Puerto Andresito; Misiones; Argentina	Female	54.16	17.24	19	4.7	4.32	5.06	4.2	3.95	10.51	12.2	25.15	24.61	14.09	24.68
Leptodactylus mystacinus	LGE 15226	Puerto Iguazú, 600 hectáreas; Misiones; Argentina	Female	56.93	18.45	20.09	5.52	4.85	5.11	4.22	4.14	9.28	13.7	NA	23.18	16.14	26.2
Leptodactylus mystacinus	LGE 15231	Peninsula Andresito, Arroyo Yacuy; Misiones; Argentina	Female	59.81	19.7	20.57	5.32	4.72	5.77	4.33	4.51	10.26	13	21.4	25.51	13.74	25.82
Leptodactylus mystacinus	LGE 15234	Río Tercero; Córdoba; Argentina	Female	51.93	15.74	17.58	5.9	4.16	4.55	3.87	4.1	9.81	11.44	18	22.42	12.14	23.09
Leptodactylus mystacinus	LGE 15239	PP Urugua-í; Misiones; Argentina	Female	54.59	19.17	20.87	6.05	4.65	5.26	4.55	4.59	9.92	12.86	23.4	26.42	14.37	25.48
Leptodactylus mystacinus	LGE 15242	San Sebastián de la Selva; Misiones; Argentina	Female	53.64	18.65	20.33	5.94	4.78	5.7	5.02	4.89	10.71	13.54	24.15	25.53	15.07	25.54
Leptodactylus mystacinus	LGE 15247	San Vicente; Misiones; Argentina	Female	56.29	17.7	18.79	4.89	4.53	5.22	4.2	4.09	10.25	13.84	16.53	25.18	14.01	25.85
Leptodactylus mystacinus	LGE 15260	Bañado de los Oliveras; Treita y Tres; Uruguay	Female	52.99	18.79	19.86	6.38	4.23	5.5	4.67	3.33	11.02	13.19	24.24	25.41	13.8	23.91
Leptodactylus mystacinus	LGE 15264	Río Negro; Uruguay	Female	62.02	20.09	19.92	5.59	5.04	5.35	3.83	3.12	11.05	13.56	17.58	25.71	14.88	25.74
Leptodactylus mystacinus	LGE 15267	Colonia Delta; San José; Uruguay	Female	52.91	17.41	18.16	5.12	4.15	4.96	3.93	2.93	8.71	12.89	22.63	22.35	12.28	22.7
Leptodactylus mystacinus	LGE 15269	Andresito; Misiones; Argentina	Female	53.11	19.61	19.43	6.79	4.57	5.56	5.02	4.47	9.8	12.58	24.29	24.27	13.54	23.35
Leptodactylus mystacinus	LGE 15270	PP Urugua-í; Misiones; Argentina	Female	57.91	18.99	20.35	5.97	5.11	5.52	4.24	4.11	10.14	14.2	14.66	23.15	14.45	25.98
Leptodactylus mystacinus	LGE 15271	Paraje Cabureí; Misiones; Argentina	Female	51.18	17.84	19.81	5.81	5.59	5.02	4.68	4.06	10.77	12.36	24.6	24.98	14.24	24.33
Leptodactylus mystacinus	LGE 15273	El Soberbio; Misiones; Argentina	Female	58.58	20.15	21.7	5.03	4.79	5.62	4.51	4.1	9.59	13.84	25.9	26.22	14.39	26.05
Leptodactylus mystacinus	LGE 16462	Aristobulo del Valle, Balneario del Arroyo Cuña Pirú; Misiones; Argentina	Female	56.63	18.51	19.12	4.94	4.44	5.69	4.67	4.92	10.29	13.13	24.21	25.12	13.9	24.12
Leptodactylus mystacinus	LGE 18886	Federal; Entre Rios; Argentina	Female	56.51	19.47	19.52	6.05	4.02	4.59	3.89	3.62	9.47	12.68	24.31	23.69	13.46	23.24
Leptodactylus mystacinus	MACN 20055	Concepcion; Entre Rios; Argentina	Female	50.19	18.84	17.6	5.13	3.22	4.72	4.07	3.7	9.58	13.08	21.28	21.91	13.29	21.3
Leptodactylus mystacinus	MACN 23269	Cerro Quemado; La Pampa; Argentina	Female	56.85	20.66	18.9	5.2	4.72	4.65	4.09	3.89	10.01	11.11	20.68	23.77	12.79	21.8
Leptodactylus mystacinus	MACN 23271	Cerro Quemado; La Pampa; Argentina	Female	56.41	22.43	19.82	5.05	4.68	5.21	3.94	3.87	11.29	11.07	NA	24.39	13.88	22.36
Leptodactylus mystacinus	MACN 26388	Ojo de agua; Santiago del Estero; Argentina	Female	51.5	18.56	18.01	4.92	4.34	4.77	3.65	2.79	8.75	11.66	18.72	21.81	11.69	20.85
Leptodactylus mystacinus	MACN 27589	Pronunciamiento; Entre Rios; Argentina	Female	47.9	18.32	17.84	5.13	3.88	4.6	3.62	3.33	10.87	12.73	18.24	23.03	12.15	24.19
Leptodactylus mystacinus	MACN 47305	La Paz; Entre Rios; Argentina	Female	53.48	20.39	18.28	5.11	3.65	4.29	3.55	3.57	10.17	11.74	22.69	22.03	11.62	21.15
Leptodactylus mystacinus	MACN 49169	Junin; San Luis; Argentina	Female	54.05	19.28	18.74	5.11	3.88	5.19	4.04	3.38	8.34	12.9	23.49	22.72	11.78	22.95
Leptodactylus mystacinus	MCP 00649	Itá; Santa Catarina; Brazil	Female	59.99	21.95	20	5.36	4.71	5.32	4.51	4.35	11.72	12.82	22.85	24.19	14.17	24.74
Leptodactylus mystacinus	MCP 02048	Reservatorio Río Jordão ; Paraná; Brazil	Female	57.07	21.09	20.6	5.09	4.76	5.28	4.47	4.27	12.01	12.53	22.65	25.38	13.75	24.69
Leptodactylus mystacinus	MCP 02050	Reservatorio Río Jordão ; Paraná; Brazil	Female	52.54	20.24	18.13	4.91	4.27	4.78	3.61	3.82	11.21	11.61	21.12	22.72	12.28	23.07
Leptodactylus mystacinus	MCP 02347	U.H.E. Serra da Mesa ; Goiás; Brazil	Female	61.17	24.32	22.72	6.39	4.77	5.56	5.06	4.57	10.68	14.57	24.73	25.46	13.68	26.7
Leptodactylus mystacinus	MCP 02939	U.H.E. Serra da Mesa ; Goiás; Brazil	Female	62.4	24.47	22.46	6.92	5.03	5.46	4.73	5.2	NA	NA	NA	NA	NA	NA
Leptodactylus mystacinus	MCP 04212	Arambaré; Rio Grande do Sul; Brazil	Female	50.99	19.61	18.99	4.72	3.78	3.84	3.69	3.83	9.59	11	20.37	19.61	10.6	20.48
Leptodactylus mystacinus	MCP 05474	Tangará do Sul; Mato Grosso; Brazil	Female	62.05	22.28	21.7	5.11	4.72	4.57	4.03	4.53	11.23	14.05	NA	NA	14.16	25.89
Leptodactylus mystacinus	MNRJ 19312	Botucatu; São Paulo; Brazil	Female	53.6	19.74	18.44	5.82	4.52	5.11	3.58	3.2	9.49	12.38	23.86	24.28	14.22	24.76
Leptodactylus mystacinus	MNRJ 19313	Botucatu; São Paulo; Brazil	Female	52.99	19.23	18.4	5.67	5.29	5.47	3.85	3.78	10.05	12.42	23.47	23.54	13.23	24.72
Leptodactylus mystacinus	MNRJ 20167	Serra da Mesa; Goiás; Brazil	Female	58.65	22.09	21.34	6.67	5.63	4.38	4.39	4.11	10.99	14.85	22.99	27.12	15.49	26.92
Leptodactylus mystacinus	MNRJ 20174	Serra da Mesa; Goiás; Brazil	Female	63.78	23.92	22.66	7.17	5.3	5.72	4.4	3.97	11.07	15.2	26.18	27.52	16.26	22.76
Leptodactylus mystacinus	MNRJ 20175	Serra da Mesa; Goiás; Brazil	Female	60.72	22.74	22.44	6.58	5.91	5.64	4.19	3.88	11.3	13.67	24.81	25.76	14.39	26.37
Leptodactylus mystacinus	MNRJ 20177	Serra da Mesa; Goiás; Brazil	Female	63.43	23.09	22.41	6.58	5.36	5.56	4.46	NA	12.19	13.93	25.51	26.91	14.98	24.04
Leptodactylus mystacinus	MNRJ 20181	Serra da Mesa; Goiás; Brazil	Female	62.73	22.71	22.15	5.97	5.13	5.44	4.27	1.79	12.72	14.52	26.05	28.55	14.45	27.24
Leptodactylus mystacinus	MNRJ 32352	Piraju; São Paulo; Brazil	Female	56.07	21.26	19.33	6.14	5.65	5.4	4.23	3.9	9.82	12.68	24.84	24.99	14.21	25.5
Leptodactylus mystacinus	MNRJ 32357	Piraju; São Paulo; Brazil	Female	49.95	20.12	17.59	5.74	5.47	4.77	4.04	3.35	9.81	12.46	22.91	23.28	12.19	22.95
Leptodactylus mystacinus	MNRJ 32360	Piraju; São Paulo; Brazil	Female	52.59	21.27	19.66	5.79	5.35	5.45	4.04	3.89	11.51	13.1	25.51	25.55	14.56	27.03
Leptodactylus mystacinus	MNRJ 34495	Turmalina; Minas Gerais; Brazil	Female	54.43	19.73	18.92	5.56	4.57	5.15	3.63	3.82	11.45	12.36	21.8	22.89	13.61	23.75
Leptodactylus mystacinus	MNRJ 43647	Volta Grande; Rio de Janeiro; Brazil	Female	53.51	18.53	17.33	5.54	4.52	4.46	3.91	3.69	9.1	11.4	21.68	22.46	11.18	22.36
Leptodactylus mystacinus	MNRJ 54949	Porto do Açu; Rio de Janeiro; Brazil	Female	45.47	16.59	19.84	4.75	4.1	3.92	2.99	3.59	NA	11	17.31	24.5	13.26	18.86
Leptodactylus mystacinus	MNRJ 56606	Iguaba Grande; Rio de Janeiro; Brazil	Female	49.31	17.82	16.6	5.89	4.16	4.49	3.05	3.16	9.38	11.53	21.04	22.7	12.26	21.81
Leptodactylus mystacinus	MNRJ 70634	Botucatu; São Paulo; Brazil	Female	57.06	20.46	18.57	5.68	4.87	5.47	3.6	3.14	10.59	12.5	23.5	22.81	13.54	24.42
Leptodactylus mystacinus	MNRJ 73703	Botucatu; São Paulo; Brazil	Female	50.92	19.28	18.06	5.63	5.18	5.19	4.12	3.35	11.02	11.53	21.81	22.61	12.06	24.03
Leptodactylus mystacinus	MNRJ 83437	Botucatu; São Paulo; Brazil	Female	56.12	21.27	19.68	6.33	5.2	4.8	3.88	3.39	11.84	12.32	23.31	23.42	13.12	25.43
Leptodactylus mystacinus	MNRJ 86010	Colinas do Sul; Goiás; Brazil	Female	58.79	22.05	20.96	5.94	4.88	5.43	4.37	4.18	13.28	14.39	27.21	26.44	15.26	27.49
Leptodactylus mystacinus	MNRJ 87245	Lambari D'Oeste; Mato Grosso; Brazil	Female	63.56	23.77	22.24	5.86	5.47	5.38	4.62	3.52	10.49	14.47	26.58	27.43	14.87	26.21
Leptodactylus mystacinus	MNRJ 87982	Carapebus; Río de Janeiro; Brazil	Female	52.4	19.48	18.73	5.92	4.45	4.8	3.71	3.59	8.99	12.1	21.99	23.15	11.94	23.27
Leptodactylus mystacinus	MNRJ 87986	Carapebus; Río de Janeiro; Brazil	Female	52.7	19.58	18.31	5.4	4.67	4.91	3.2	3.76	8.59	12.51	23	22.59	13.41	23.27
Leptodactylus mystacinus	MNRJ 87988	Carapebus; Río de Janeiro; Brazil	Female	55.51	21.01	20.96	6.09	4.73	5.38	3.54	3.81	11.43	11.81	23.94	23.95	12.6	24.95
Leptodactylus mystacinus	MNRJ 90020	Vila Bela da Santissima Trindade; Mato Grosso; Brazil	Female	62.5	22.64	20.57	6.23	5.6	5.9	4.33	3.8	11.64	14.42	25.41	27.1	15.38	25.98
Leptodactylus mystacinus	MTR 15558	Iperó; São Paulo; Brazil	Female	56.04	20.4	19.27	5.49	4.86	4.86	3.64	4.3	10.05	12.91	24.71	25.59	13.91	25.89
Leptodactylus mystacinus	MTR 38717	Monte Alegre; Bahia; Brazil	Female	57.8	21.47	20.82	6.65	4.95	5.14	4.44	4	11.73	12.81	24.45	24.2	12.51	24.72
Leptodactylus mystacinus	MZUSP 014907	Eugenio Lefevre; São Paulo; Brazil	Female	55.19	21.07	18.55	6.05	4.72	4.48	3.73	3.07	10.17	12.95	23.48	24.2	13.16	23.92
Leptodactylus mystacinus	MZUSP 053207	Serra da Bocaina; São Paulo; Brazil	Female	51.6	20.25	18.28	6.01	4.8	4.74	3.7	4.07	8.73	11.87	21.58	22.64	12.74	23.11
Leptodactylus mystacinus	MZUSP 089747	UHE Serra da Mesa; Goiás; Brazil	Female	61.46	22.4	22.03	5.61	4.84	5.63	3.77	3.54	10.21	13.53	25.54	26.05	14.98	25.82
Leptodactylus mystacinus	MZUSP 089749	UHE Serra da Mesa; Goiás; Brazil	Female	61.88	23.07	21.81	6.65	5.24	5.43	3.91	3.87	14.5	13.51	25.61	28.38	15.95	26.62
Leptodactylus mystacinus	MZUSP 089750	UHE Serra da Mesa; Goiás; Brazil	Female	63.54	24.36	22.28	6.92	5.64	5.39	4.6	3.65	14.55	14.52	25.32	30.08	14.37	27.38
Leptodactylus mystacinus	MZUSP 089754	UHE Serra da Mesa; Goiás; Brazil	Female	61.74	22.44	21.43	5.78	5.2	5.28	3.89	2.79	11.97	14.53	23.58	27.85	15.17	26.78
Leptodactylus mystacinus	MZUSP 089756	UHE Serra da Mesa; Goiás; Brazil	Female	61.67	23.28	22.33	6.9	5.65	5.63	4.37	NA	10.28	14.52	25.6	26.38	14.39	26.19
Leptodactylus mystacinus	MZUSP 089756	UHE Serra da Mesa; Goiás; Brazil	Female	65.44	27.12	22.63	6.5	5.18	5.36	3.91	3.54	14.25	14.88	25.25	28.8	15.55	26.19
Leptodactylus mystacinus	MZUSP 089772	UHE Serra da Mesa; Goiás; Brazil	Female	63.24	23.79	22.42	6.99	5.37	5.75	4.69	NA	11.04	14.42	27	29.09	16.94	28.57
Leptodactylus mystacinus	MZUSP 100963	UHE Manso; Mato Grosso; Brazil	Female	58.47	22.48	21.75	6.46	5.12	5.23	4.56	4.38	10.75	14.57	23.19	25.55	13.44	25.05
Leptodactylus mystacinus	MZUSP 100964	UHE Manso; Mato Grosso; Brazil	Female	56.45	22.26	20.64	6.03	4.64	5.43	3.88	3.97	10.4	13.59	24.4	25.88	15.22	25.98
Leptodactylus mystacinus	MZUSP 100965	UHE Manso; Mato Grosso; Brazil	Female	58.35	21.68	20.23	5.92	4.67	5	3.77	3.85	9.52	12.93	24.05	25.01	14.48	25.86
Leptodactylus mystacinus	MZUSP 100966	UHE Manso; Mato Grosso; Brazil	Female	55.31	22.68	21.08	5.29	5.16	5.07	3.67	3.83	9.64	13.32	23.56	25.18	13.71	24.49
Leptodactylus mystacinus	MZUSP 100968	UHE Manso; Mato Grosso; Brazil	Female	53.44	22.05	21.12	5.4	4.61	5.39	3.82	3.85	9.85	13.16	24.52	25.38	14.92	23.82
Leptodactylus mystacinus	MZUSP 100969	UHE Manso; Mato Grosso; Brazil	Female	59.83	24.18	23.15	6.45	5.16	5.45	3.95	3.88	11.17	14.08	25.37	26.56	14.27	27.36
Leptodactylus mystacinus	MZUSP 138161	Itararé; São Paulo; Brazil	Female	52.55	21.06	19.66	5.06	4.92	4.8	3.36	3.95	10.17	12.64	23.35	24.36	13.4	24.94
Leptodactylus mystacinus	MZUSP 138163	Itararé; São Paulo; Brazil	Female	57.06	20.2	19.19	5.65	4.91	4.79	3.6	2.92	10.86	12.74	23.29	24.68	13.31	25.22
Leptodactylus mystacinus	MZUSP 138169	Itararé; São Paulo; Brazil	Female	56.45	21.38	20.28	5.85	5.54	4.75	3.84	3.14	9.85	12.73	20.95	24.87	12.76	24.88
Leptodactylus mystacinus	MZUSP 140859	UHE Corumbá; Goiás; Brazil	Female	59.19	22.27	19.09	6.09	4.67	4.77	3.94	3.3	10.53	13.34	25.02	25.28	13.39	25.6
Leptodactylus mystacinus	MZUSP 140864	UHE Corumbá; Goiás; Brazil	Female	56.78	22.02	19.7	5.68	4.66	5.79	3.99	4.01	9.87	13.12	26.48	25.34	13.61	26.72
Leptodactylus mystacinus	MZUSP 140965	UHE Corumbá; Goiás; Brazil	Female	57.86	21.44	20.74	5.99	4.86	5.41	3.99	3.09	10.76	13.46	24.18	25.15	14.95	25.71
Leptodactylus mystacinus	MZUSP 140972	UHE Corumbá; Goiás; Brazil	Female	60.66	23.35	22.19	6.07	5.65	5.9	3.84	3.74	10.57	15.06	25.15	26.77	15.14	27.1
Leptodactylus mystacinus	MZUSP 140976	UHE Corumbá; Goiás; Brazil	Female	64.07	24.55	23.18	6.41	5.74	5.82	4.98	2.89	11.95	13.19	28.02	26.99	14.71	26.13
Leptodactylus mystacinus	MZUSP 140977	UHE Corumbá; Goiás; Brazil	Female	59.11	23.21	20.76	6.15	4.6	5.25	3.73	3.84	11.62	13.25	26.95	26.57	14.07	25.6
Leptodactylus mystacinus	MZUSP 140980	UHE Corumbá; Goiás; Brazil	Female	58.18	21.4	20.28	6.04	4.89	5.05	4.51	3.84	12.82	12.02	23.71	24.97	13.56	26.18
Leptodactylus mystacinus	MZUSP 141807	Tesouro; Mato Grosso; Brazil	Female	59.41	22.52	22.78	6.29	5.21	5.35	4.14	4.8	11.57	12.38	23.41	24.63	12.32	24.92
Leptodactylus mystacinus	MZUSP 142134	Sao Salvador; Tocantins; Brazil	Female	66.1	22.6	22.34	5.64	5.49	5.98	4.29	NA	10.76	14.79	27.72	28.17	15.21	26.26
Leptodactylus mystacinus	MZUSP 152113	Barra do garcas; Mato Grosso; Brazil	Female	57.5	20.88	19.69	6.12	4.55	5.28	4.05	4.21	10.25	13.21	24.11	25.66	14.62	25.64
Leptodactylus mystacinus	UFRGS 1702	Eldorado do Sul; Río Grande do Sul; Brazil	Female	52.07	19.6	17.8	4.81	3.65	4.65	3.25	3.8	10.18	11.67	19.71	21.64	11.51	22.71
Leptodactylus mystacinus	UFRGS 2202	Derrubadas; Río Grande do Sul; Brazil	Female	56.77	21.8	19.92	5.94	4.96	4.87	4.13	3.85	9.31	13	24.63	23.83	12.94	24.97
Leptodactylus mystacinus	UFRGS 6011	Alpestre; Río Grande do Sul; Brazil	Female	58.91	22.73	20.38	5.78	5.08	4.86	4.2	3.85	12.02	13.36	26.12	25.46	14.35	27.12
Leptodactylus mystacinus	ZUFSM 00356	Santa María; Río Grande do Sul; Brazil	Female	56.15	21.21	18.63	5.9	4.15	5.5	3.46	2.99	11.06	11.68	21.59	23.54	13.33	23.09
Leptodactylus mystacinus	ZUFSM 00674	Santa María; Río Grande do Sul; Brazil	Female	57.88	20.91	19.5	5.3	4.4	4.79	3.6	3.72	9.26	13.08	21.92	23.74	12.95	24.84
Leptodactylus mystacinus	ZUFSM 00887	Santa María; Río Grande do Sul; Brazil	Female	57.59	20.45	19.1	6.33	3.98	4.84	3.6	2.66	10.11	12.25	21.47	23.67	12.69	23.09
Leptodactylus mystacinus	ZUFSM 04473	Derrubadas; Río Grande do Sul; Brazil	Female	58.28	23.52	19.9	5.25	5.52	5.36	4.58	NA	10.32	13.61	22.3	25.72	12.73	25.35
Leptodactylus mystacinus	ZUFSM 04525	Derrubadas; Río Grande do Sul; Brazil	Female	57.36	22.4	19.61	5.63	4.37	4.76	3.89	3.75	9.28	13.54	22.24	24.83	12.55	26.22
Leptodactylus mystacinus	ZUFSM 09404	São Gabriel; Río Grande do Sul; Brazil	Female	53.43	21.19	19.41	5.57	4.64	5.72	3.39	4	11.36	12.51	24.83	23.47	11.64	24.54
Leptodactylus mystacinus	ZUFSM 09445	São Gabriel; Río Grande do Sul; Brazil	Female	54.89	20.94	18.67	6.17	4.06	5.48	3.89	3.86	9.48	12.93	24.05	23.61	12.09	22.57
Leptodactylus mystacinus	ZUFSM 09510	São Gabriel; Río Grande do Sul; Brazil	Female	52.67	22.18	19.45	6.15	4.24	5.04	4.02	3.66	9	13.19	24.12	22.76	13.04	22.1
Leptodactylus mystacinus	ZUFSM 11528	São Rafael; Río Grande do Sul; Brazil	Female	53.45	20.58	18.89	5.6	4.27	4.9	4.36	NA	9.37	12.54	19.87	22.75	12.18	23.07
Leptodactylus mystacinus	ZUFSM 11545	São Rafael; Río Grande do Sul; Brazil	Female	56.82	21.92	19.68	5.58	4.17	5.56	3.59	3.81	9.58	12.3	18.63	21.37	13.43	22.14
